# Supplementary material for: Ergothioneine exhibits longevity-extension effect in Drosophila melanogaster via regulation of cholinergic neurotransmission, tyrosine metabolism, and fatty acid oxidation
Source: Royal Society of Chemistry journal article supplement (doi:10.1039/d1fo02758a), 2021-11-20
Supplement: d1fo02758a1.pdf [file d1fo02758a1.pdf]

## SUPPLEMENTARY FIGURES AND INFORMATION

### Title

Ergothioneine exhibits longevity-extension effect in *Drosophila Melanogaster* via regulating of cholinergic neurotransmission, tyrosine metabolism, and fatty acid oxidation

### Authors

Hong-Yu Pan<sup>1,3</sup>, Zhi-Wei Ye<sup>1,3</sup>, Qian-Wang Zheng<sup>1,3</sup>, Fan Yun<sup>2</sup>, Ming-Zhen Tu<sup>1</sup>, Wei-Guo Hong<sup>1</sup>, Li-Qiong Guo<sup>1,3,\*</sup>, Jun-Fang Lin<sup>1,3,\*</sup>

1 College of Food Science & Institute of Food Biotechnology, South China Agricultural University, Guangzhou 510640, China

2 Guangzhou Alchemy Biotechnology Co., Guangzhou 510760, China

3 Research Center for Micro-Ecological Agent Engineering and Technology of Guangdong Province, Guangzhou 510640, China

\*Correspondence author Li-Qiong Guo (L. Q. Guo). E-mail address: guolq@scau.edu.cn

\*Correspondence author Jun-Fang Lin (J. F. Lin). E-mail address: linjf@scau.edu.cn

Table S1 Statistical analysis of lifespan experiments for Canton S and yw females and males

| Figure    | Genotype | Sex     | EGT concentration (uM) | Median | Number of flies | % Increase over flies on control food | Log-rank test comparison to control |
|-----------|----------|---------|------------------------|--------|-----------------|---------------------------------------|-------------------------------------|
| Figure 1A | Canton S | Females | 0                      | 85     | 129             |                                       |                                     |
|           | Canton S | Females | 10000                  | 86     | 138             | 1%                                    | P<0.0001                            |
|           | Canton S | Females | 1000                   | 94.5   | 114             | 11%                                   | P<0.0001                            |
|           | Canton S | Females | 100                    | 97.5   | 124             | 15%                                   | P<0.0001                            |
|           | Canton S | Females | 10                     | 94     | 138             | 11%                                   | P<0.0001                            |
|           | Canton S | Females | 1                      | 85     | 133             | 0%                                    | P<0.0001                            |
|           | Canton S | Females | 0.1                    | 87     | 116             | 2%                                    | P<0.0001                            |
| Figure 1B | Canton S | Males   | 0                      | 69     | 142             |                                       |                                     |
|           | Canton S | Males   | 10000                  | 66     | 147             | -4%                                   | p=0.311                             |
|           | Canton S | Males   | 1000                   | 77     | 147             | 12%                                   | p=0.0016                            |
|           | Canton S | Males   | 100                    | 75     | 152             | 9%                                    | p=0.0118                            |
|           | Canton S | Males   | 10                     | 72     | 143             | 4%                                    | p=0.5998                            |
|           | Canton S | Males   | 1                      | 65     | 146             | -6%                                   | p=0.0001                            |
|           | Canton S | Males   | 0.1                    | 66     | 140             | -4%                                   | p=0.0364                            |
| Figure 1C | YW       | Females | 0                      | 73     | 142             |                                       |                                     |
|           | YW       | Females | 10000                  | 69     | 129             | -5%                                   | p=0.0425                            |
|           | YW       | Females | 1000                   | 81     | 140             | 11%                                   | p<0.0001                            |
|           | YW       | Females | 100                    | 85     | 123             | 16%                                   | p<0.0001                            |
|           | YW       | Females | 10                     | 70     | 136             | -4%                                   | p=0.1002                            |
|           | YW       | Females | 1                      | 74     | 146             | 1%                                    | p=0.1067                            |
|           | YW       | Females | 0.1                    | 68     | 133             | -7%                                   | p=0.0009                            |
| Figure 1D | YW       | Males   | 0                      | 70     | 113             |                                       |                                     |
|           | YW       | Males   | 10000                  | 69     | 137             | -1%                                   | p=0.0135                            |
|           | YW       | Males   | 1000                   | 72     | 140             | 3%                                    | p=0.6320                            |
|           | YW       | Males   | 100                    | 75     | 145             | 7%                                    | p<0.0001                            |
|           | YW       | Males   | 10                     | 74     | 120             | 6%                                    | p<0.0001                            |
|           | YW       | Males   | 1                      | 60     | 143             | -14%                                  | p=0.9676                            |
|           | YW       | Males   | 0.1                    | 60     | 137             | -14%                                  | p=0.2175                            |

Table S2 Statistical analysis of lifespan experiments for dietary restriction

| Figure | Number of | EGT | DR | Median | % Increase over | Log-rank test |
|--------|-----------|-----|----|--------|-----------------|---------------|
|--------|-----------|-----|----|--------|-----------------|---------------|

|        | flies | concentration (uM) | medium (% yeast) |    | flies on control food | comparison to control food |
|--------|-------|--------------------|------------------|----|-----------------------|----------------------------|
| Fig 1G | 139   | 0                  | 1%               | 68 |                       |                            |
|        | 148   | 100                | 1%               | 72 | 6%                    | p=0.0001                   |
| Fig 1G | 139   | 0                  | 5%               | 76 |                       |                            |
|        | 143   | 100                | 5%               | 79 | 4%                    | p=0.0009                   |
| Fig 1G | 141   | 0                  | 10%              | 80 |                       |                            |
|        | 136   | 100                | 10%              | 86 | 8%                    | p=0.0086                   |
| Fig 1G | 141   | 0                  | 15%              | 72 |                       |                            |
|        | 149   | 100                | 15%              | 78 | 8%                    | p=0.0007                   |
| Fig 1G | 138   | 0                  | 20%              | 66 |                       |                            |
|        | 136   | 100                | 20%              | 75 | 14%                   | p<0.0001                   |

Table S3 Statistical analysis of stress survival experiments for yw females

| Figure | Sex     | Number of flies | EGT concentration (uM) | Stresses                         | Median | Log-rank test comparison to control food |
|--------|---------|-----------------|------------------------|----------------------------------|--------|------------------------------------------|
| Fig 2A | Females | 117             | 0                      | 5% H <sub>2</sub> O <sub>2</sub> | 32h    |                                          |
|        | Females | 118             | 100                    | 5% H <sub>2</sub> O <sub>2</sub> | 48h    | p=0.0008                                 |
| Fig 2B | Females | 119             | 0                      | 10mM Paraquat                    | 36h    |                                          |
|        | Females | 117             | 100                    | 10mM Paraquat                    | 48h    | p=0.0003                                 |
| Fig 2C | Females | 120             | 0                      | Heat (37°C)                      | 6h     |                                          |
|        | Females | 120             | 100                    | Heat (37 °C)                     | 12h    | p<0.0001                                 |
| Fig 2D | Females | 120             | 0                      | Desiccation                      | 8h     |                                          |
|        | Females | 117             | 100                    | Desiccation                      | 8h     | p=0.0042                                 |
| Fig 2E | Females | 118             | 0                      | Starvation                       | 3d     |                                          |
|        | Females | 120             | 100                    | Starvation                       | 7d     | p<0.0001                                 |
| Fig 2A | Male    | 119             | 0                      | 5% H <sub>2</sub> O <sub>2</sub> |        |                                          |
|        | Male    | 127             | 100                    | 5% H <sub>2</sub> O <sub>2</sub> |        | p=0.0299                                 |
| Fig 2B | Male    | 117             | 0                      | 10mM Paraquat                    | 83h    |                                          |
|        | Male    | 119             | 100                    | 10mM Paraquat                    | 83h    | p=0.1418                                 |
| Fig 2C | Male    | 120             | 0                      | Heat (37°C)                      | 53h    |                                          |
|        | Male    | 119             | 100                    | Heat (37 °C)                     | 53h    | p<0.0001                                 |
| Fig 2D | Male    | 118             | 0                      | Desiccation                      | 6h     |                                          |
|        | Male    | 121             | 100                    | Desiccation                      | 9h     | p=0.1306                                 |
| Fig 2E | Male    | 120             | 0                      | Starvation                       | 4h     |                                          |
|        | Male    | 120             | 100                    | Starvation                       | 4h     | p<0.0001                                 |

Table S4 Effects of EGT on the antioxidant status in brain tissues of young and aged *D.melanogaster* females

| Treatment | No. | GSSG (umol/g weight) | GSH (umol/g weight) | GSH/GSSG    |
|-----------|-----|----------------------|---------------------|-------------|
| Ck-D10    | 1   | 2.170680617          | 334.284815          | 154         |
|           | 2   | 2.477321814          | 328.3154433         | 132.5283786 |
|           | 3   | 1.727861771          | 334.103925          | 193.3626466 |
| EGT-D10   | 1   | 4.168466523          | 682.5209379         | 163.7342975 |
|           | 2   | 5.399568035          | 685.2401448         | 126.9064748 |
|           | 3   | 4.384449244          | 679.801731          | 155.0483751 |
| CK-D30    | 1   | 12.31346252          | 258.8121562         | 21.01863354 |
|           | 2   | 13.56193             | 263.248062          | 19.41081114 |
|           | 3   | 11.1394              | 265.2365714         | 23.81066947 |
| EGT-D30   | 1   | 6.26349892           | 421.2849785         | 67.26032588 |
|           | 2   | 5.788336933          | 414.9100386         | 71.68035369 |
|           | 3   | 6.652267819          | 418.5254699         | 62.91470538 |

Abbreviations: GSH = reduced glutathione; GSSG = oxidized glutathione; Values are represented as means  $\pm$  SD, n = 30 for the test groups)

Table S5 Quality statistics of clean sequencing data

| Sample | Clean reads | Bases (bp) | AF-Q20% | AF-Q30% | AF-GC% |
|--------|-------------|------------|---------|---------|--------|
| Ck1    | 40650058    | 6234426000 | 98.49%  | 95.42%  | 50.34% |
| Ck2    | 33128244    | 5074689300 | 98.52%  | 95.45%  | 49.77% |
| Ck3    | 36334318    | 5541768600 | 98.37%  | 95.06%  | 49.44% |
| EGT1   | 38655782    | 5970233700 | 98.44%  | 95.23%  | 48.45% |
| EGT2   | 39237312    | 6032070300 | 98.48%  | 95.31%  | 48.67% |
| EGT3   | 36784508    | 5630997900 | 98.44%  | 95.22%  | 48.73% |

Q20, Q30 refer to the proportion of base calls with Phred scores  $> 20$  or  $30$  in the total raw reads. AF-GC% refers to the after filter; Higher scores ensured the base calling accuracy and data quality. Each group has three biological replicates.

Table S6 The KEGG pathway enrichment analysis

The column of “log<sub>2</sub> Fold Change” represents the base-two logarithm value of the fold change of the gene expression; “+” means up-regulated genes; “-” means down-regulated genes. Hypergeometric test was used for statistical analysis. The FDR < 0.05 plus the absolute log<sub>2</sub> Fold Change value > 1 were considered statistically significant.

Table S7 Primer sequences for RT-qPCR analysis of RNA-samples of *D.melanogaster* yw

| ID                                      | Targeted gene                                  | Primer sequence         | Tm (°C)     |
|-----------------------------------------|------------------------------------------------|-------------------------|-------------|
| ID (Symbol)                             | Description                                    | Log2(FC)                | p value     |
| <b>Metabolic pathways</b>               |                                                |                         |             |
| FBgn0030596(CG12398)                    | FI24332p1, partial                             | 1.841213726             | 5.99E-13    |
| FBgn0040211(hgo)                        | homogentisate 1,2-dioxygenase                  | -1.323214493            | 1.63E-11    |
| FBgn0036992(Hpd)                        | 4-hydroxyphenylpyruvate dioxygenase            | -1.504948315            | 2.58E-34    |
| FBgn0283437(PPO1))                      | TYR; tyrosinase                                | -1.47312386             | 1.26E-12    |
| FBgn0026755(Ugt37B1)                    | UDP-glycosyltransferase family 37 member B1    | -1.243150982            | 0.000752176 |
| FBgn0030558(CG1461)                     | uncharacterized protein Dmel_CG1461, isoform B | -1.184267321            | 6.56E-13    |
| FBgn0033296(Mal-A7)                     | maltase A7, isoform B                          | -1.032463772            | 0.001440658 |
| FBgn0040069(vanin-like)                 | vanin-like                                     | 1.250631126             | 1.84E-23    |
| FBgn0037697(GstZ2)                      | GH17960p, partial                              | -1.086316602            | 9.73E-06    |
| FBgn0036381(CG8745)                     | uncharacterized protein Dmel_CG8745            | 1.047484649             | 3.87E-36    |
| FBgn0286723(hll)                        | heimdall                                       | -1.80668778             | 7.51E-11    |
| <b>Tyrosine metabolism</b>              |                                                |                         |             |
| FBgn0040211(hgo)                        | homogentisate 1,2-dioxygenase                  | -1.323214493            | 1.63E-11    |
| FBgn0036992(Hpd)                        | 4-hydroxyphenylpyruvate dioxygenase, isoform A | -1.504948315            | 2.58E-34    |
| FBgn0283437(PPO1)                       | prophenoloxidase 1                             | -1.47312386             | 1.26E-12    |
| FBgn0030558(CG1461)                     | uncharacterized protein Dmel_CG1461, isoform B | -1.184267321            | 6.56E-13    |
| FBgn0037697(GstZ2)                      | GH17960p, partial                              | -1.086316602            | 9.73E-06    |
| <b>Protein digestion and absorption</b> |                                                |                         |             |
| FBgn0031406(Send1)                      | spermathecal endopeptidase 1                   | 1.752841557             | 1.86E-24    |
| FBgn0019928(Ser8)                       | IP02555p, partial                              | 1.035536157             | 0.00057038  |
| FBgn0033760(CG8785)                     | uncharacterized protein Dmel_CG8785, isoform A | 1.153947743             | 1.04E-29    |
| FBgn0000042                             | <i>Act 5C-F</i>                                | TTGTCTGGGCAAGAGGATCAG   | 58°C        |
|                                         | <i>Act 5C-R</i>                                | ACCACTCGCACTTGCACCTTC   |             |
| FBgn0051661                             | <i>CG31661-F</i>                               | ACCGTCACCACAAGATTCCT    | 58°C        |
|                                         | <i>CG31661-R</i>                               | GGTCACATTCACAGCATTAC    |             |
| FBgn0030558                             | <i>CG1461-F</i>                                | AGAGTCAGTTCCGATAACCAGAG | 58°C        |
|                                         | <i>CG1461-R</i>                                | TTGCGTATGTCCTGCGATTG    |             |
| FBgn0037697                             | <i>GstZ2-F</i>                                 | GATGTAACCTTGACCGTGTGAG  | 58°C        |
|                                         | <i>GstZ2-R</i>                                 | TGACTATTGGCGTTCGTTCTTC  |             |
| FBgn0040211                             | <i>hgo-F</i>                                   | CGTGGCTCTACAGGAAGTTG    | 58°C        |

|             |              |                         |      |
|-------------|--------------|-------------------------|------|
|             | <i>hgo-R</i> | GATTCGGTGGCTGCTCATC     |      |
| FBgn0036992 | <i>Hpd-F</i> | CCGTGGATGACTCGCAGAT     | 58°C |
|             | <i>Hpd-R</i> | CTTCACCGTCTCCTCGTAGTT   |      |
| FBgn0032055 | <i>Sgp-F</i> | TGGCATCCGATTGTTAGGGG    | 58°C |
|             | <i>Sgp-F</i> | TGGCATCCGATTGTTAGGGG    |      |
| FBgn0286723 | <i>Hll-F</i> | CCAATGATACTGCCGCTCTG    | 58°C |
|             | <i>Hll-R</i> | CATACTTATTCGCTCGCTTGATG |      |
| FBgn0038641 | <i>ChT-F</i> | ACGACGAGGAGACCAAGGA     | 58°C |
|             | <i>ChT-R</i> | CACCAGGAGACCGAGATGAG    |      |

Abbreviations: Sgp = Sgropino; Hll = Heimdal; GstZ2 = maleylacetoacetate isomerase; hgo = homogentisate 1,2-dioxygenase; Hpd = 4-hydroxyphenylpyruvate dioxygenase; ChT = choline transporter

Table S8 ELISA assay kit measures the CTSD level in brain tissues of aged *D.melanogaster* females

| CTSD level (ng/g weight) | Ck-D30 | EGT-D30 |
|--------------------------|--------|---------|
| 1                        | 40.56  | 55.76   |
| 2                        | 35.52  | 69.8    |
| 3                        | 35.62  | 78.12   |

Table S9 Feeding intake assay

| 1h feeding<br>(ug/fly/1h) | Ck       |            | EGT       |            |
|---------------------------|----------|------------|-----------|------------|
|                           | D10      | D30        | D10       | D30        |
| #1                        | 8.162881 | 16.901305  | 8.693393  | 17.3570515 |
| #2                        | 8.328666 | 17.0532205 | 8.826021  | 17.0194615 |
| #3                        | 8.295509 | 17.036341  | 8.8094425 | 16.9594    |

  

| 48 hrs feeding<br>(ug/fly/1h) | Ck        |             | EGT        |           |
|-------------------------------|-----------|-------------|------------|-----------|
|                               | D10       | D30         | D10        | D30       |
| #1                            | 15.04456  | 16.05733    | 24.328285  | 25.678645 |
| #2                            | 17.914075 | 18.31749505 | 22.977925  | 28.379365 |
| #3                            | 15.38215  | 17.31485275 | 20.0915305 | 22.741612 |

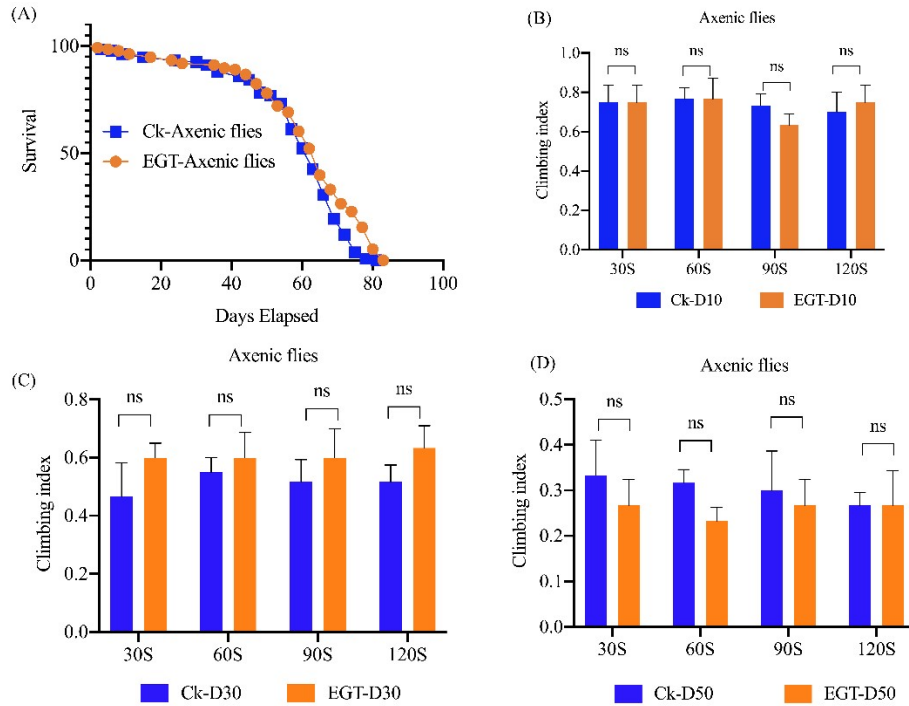

Figure S1 lifespan extension effect by EGT is abolished in axenic flies (A), and axenic flies (under conventional reared and EGT supplementation conditions) showed compromised climbing activity at different stages of life (B-D); Independently repeated three times with 20 flies per group.

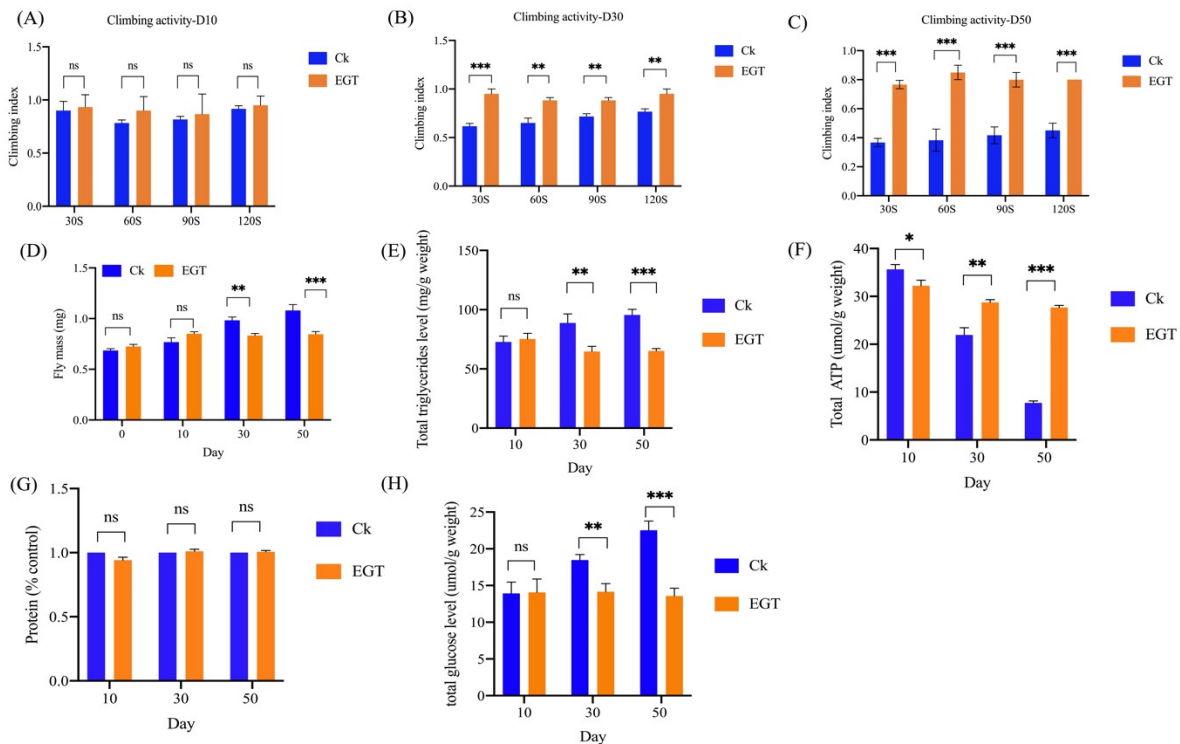

Figure S2 Supplementation with EGT improves fitness and metabolic parameters in aging *Drosophila melanogaster*. An increased climbing ability in aging flies with EGT supplementation was observed at different stages of life (A-C); Metabolic parameters, including (A) weight, (B) total triglycerides (TAG), (C) total ATP, (D) total glucose, and (E) total proteins, were measured in yw females after 10, 30, 50 days of EGT treatment from whole flies. The climbing test was independently repeated three times with 20 flies per group. Data are shown as mean  $\pm$  SEM. Each group



contained n = 3 independent groups and significance is indicated as stars (\*) relative to the control group with ns: p > 0.05, \*p < 0.05, \*\*p < 0.01, and \*\*\*p < 0.001.

(A) Cellular components

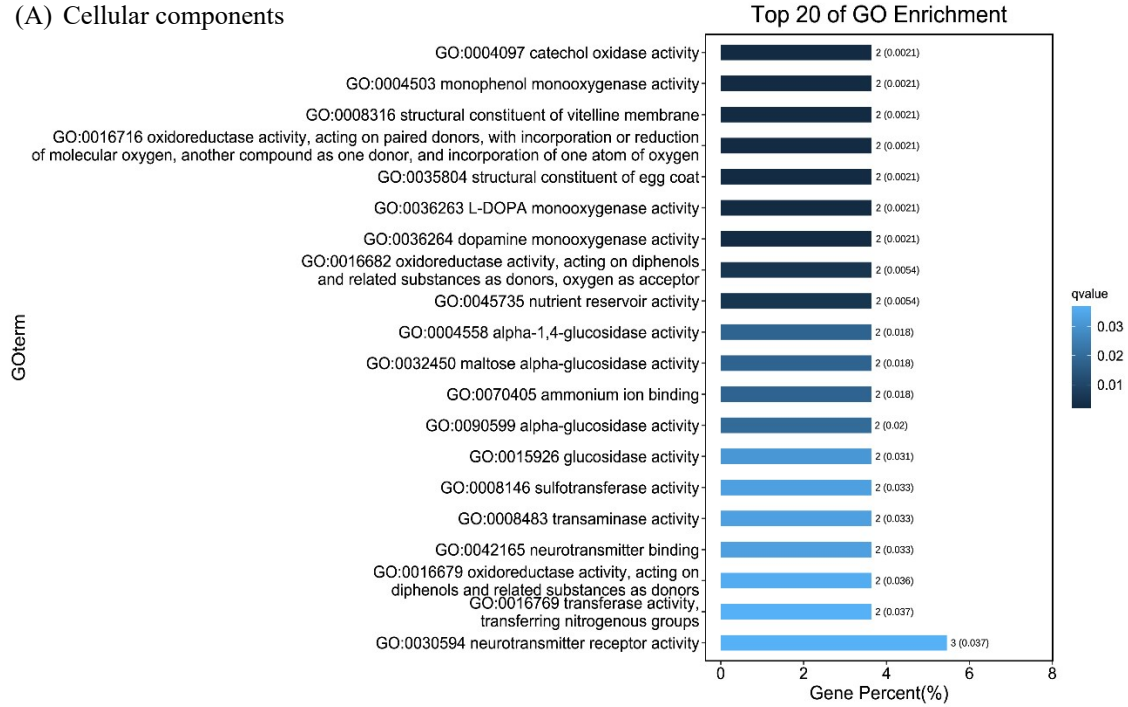

(B) Molecular function

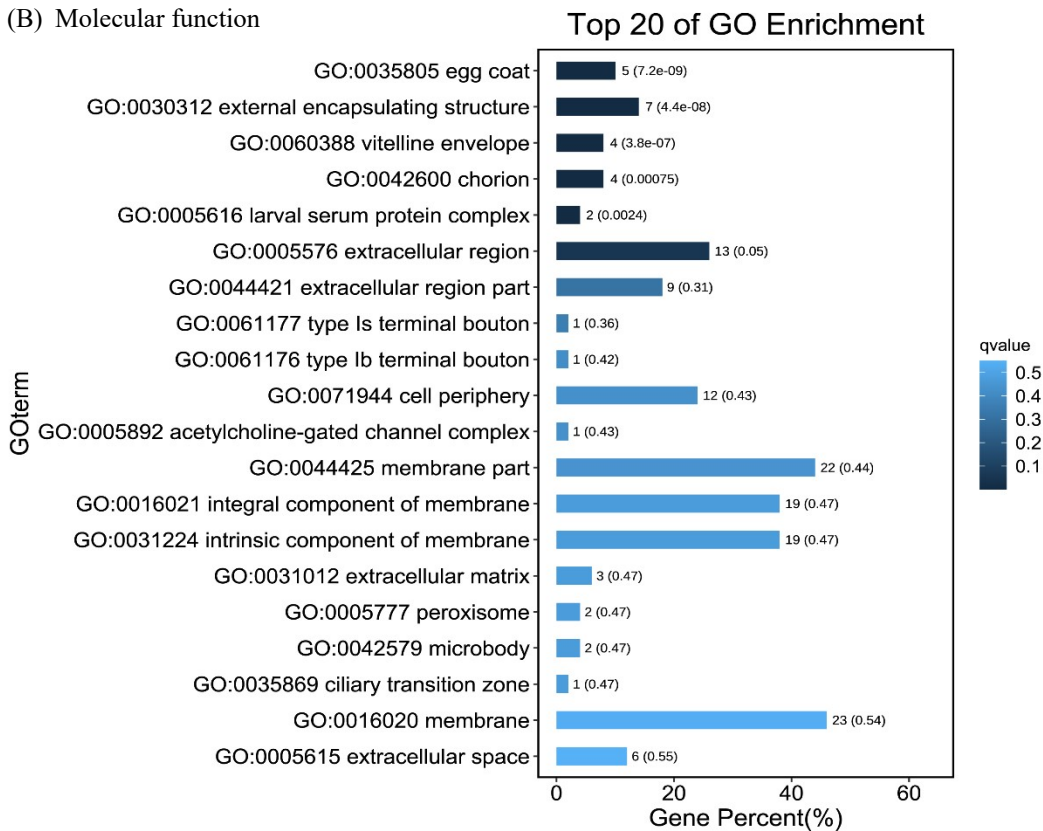

(C) Biological process

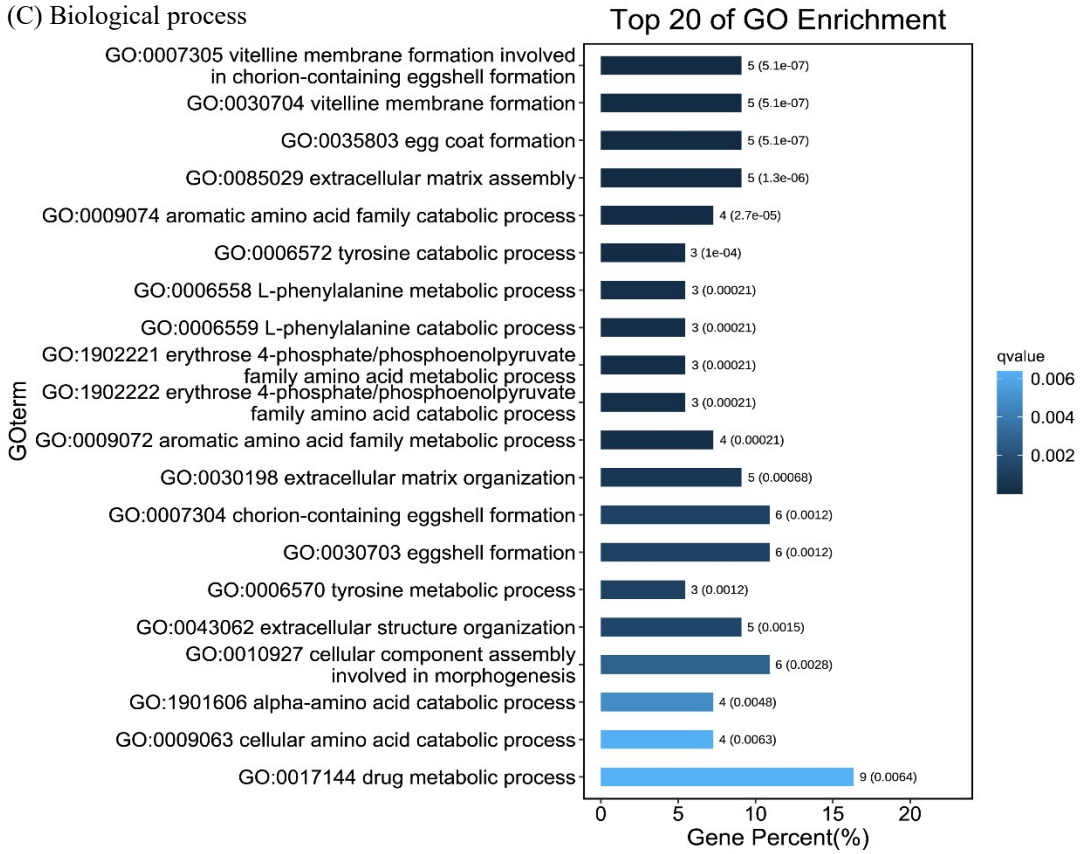

Figure S3 Bar plot of GO enrichment analysis of DEGs between Ck group VS EGT group, the top 20 GO term entries with the smallest Q value were displayed with molecular function (A), cellular components (B), and biological process (C); x-axis represents gene percentage (%). y-axis represents different functional groups (also named as different GO terms).

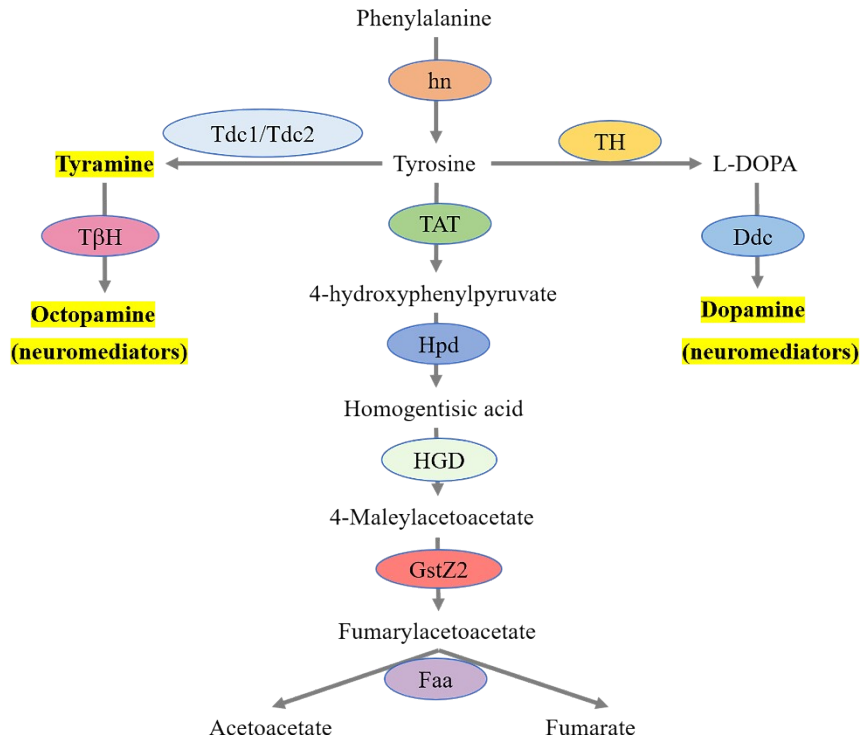

Figure S4 Schematic representation of tyrosine metabolism and the constituent enzymes.
