# Supplementary material for: Ergothioneine exhibits longevity-extension effect in Drosophila melanogaster via regulation of cholinergic neurotransmission, tyrosine metabolism, and fatty acid oxidation
Source: Royal Society of Chemistry journal article supplement (doi:10.1039/d1fo02758a), 2021-11-20
Supplement: d1fo02758a2.xlsx [file d1fo02758a2.xlsx]

## Sheet: RNAseq reads
id	log2(fc)	PValue	FDR	Symbol	Description
FBgn0014859	3.55963	3.95735e-84	4.0919e-80	Hr38	hormone receptor-like in 38, isoform B [Drosophila melanogaster]
FBgn0033188	0.9983	3.66973e-36	1.33245e-32	Drat	death resistor Adh domain containing target, isoform C [Drosophila melanogaster]
FBgn0036381	1.04748	3.8659e-36	1.33245e-32	CG8745	uncharacterized protein Dmel_CG8745 [Drosophila melanogaster]
FBgn0042186	1.85357	1.44622e-34	3.73848e-31	CG17239	uncharacterized protein Dmel_CG17239, isoform B [Drosophila melanogaster]
FBgn0036992	-1.50495	2.58139e-34	5.33832e-31	Hpd	4-hydroxyphenylpyruvate dioxygenase, isoform A [Drosophila melanogaster]
FBgn0051324	1.66428	2.87879e-33	4.96112e-30	CG31324	uncharacterized protein Dmel_CG31324, isoform B [Drosophila melanogaster]
FBgn0033760	1.15395	1.04335e-29	1.54117e-26	CG8785	uncharacterized protein Dmel_CG8785, isoform A [Drosophila melanogaster]
FBgn0032055	-1.10838	6.01313e-29	7.77197e-26	Sgp	--
FBgn0003980	1.38977	4.42269e-27	5.08118e-24	Vm26Ab	vitelline membrane 26Ab, isoform B [Drosophila melanogaster]
FBgn0042086	-0.718608	3.90316e-25	4.03587e-22	Tsp42Eb	tetraspanin 42Eb [Drosophila melanogaster]
FBgn0031406	1.75284	1.85869e-24	1.74717e-21	Send1	spermathecal endopeptidase 1 [Drosophila melanogaster]
FBgn0029831	-0.91622	6.76435e-24	5.82862e-21	CG5966	uncharacterized protein Dmel_CG5966, isoform A [Drosophila melanogaster]
FBgn0040069	1.25063	1.8361e-23	1.46041e-20	vanin-like	vanin-like [Drosophila melanogaster]
FBgn0039872	0.787991	7.21944e-23	5.33207e-20	salt	salty dog, isoform B [Drosophila melanogaster]
FBgn0036833	-1.12198	8.60998e-23	5.93514e-20	CG3819	uncharacterized protein Dmel_CG3819, isoform B [Drosophila melanogaster]
FBgn0003961	0.857771	1.45435e-21	9.39876e-19	Uro	urate oxidase [Drosophila melanogaster]
FBgn0036419	-0.742414	1.29059e-20	7.8498e-18	CG13482	***** No hits found *****
FBgn0000078	-0.919742	2.41299e-20	1.38613e-17	Amy-d	amylase distal [Drosophila melanogaster]
FBgn0040609	1.15788	9.87775e-20	5.37557e-17	CG3348	uncharacterized protein Dmel_CG3348, isoform B [Drosophila melanogaster]
FBgn0284233	-1.47699	1.31527e-19	6.79997e-17	CG46317	***** No hits found *****
FBgn0042187	3.53924	9.41301e-19	4.63479e-16	CG17234	MIP16537p, partial [Drosophila melanogaster]
FBgn0040153	-0.958004	5.71598e-18	2.68651e-15	l(1)G0469	lethal (1) G0469, isoform C [Drosophila melanogaster]
FBgn0266430	-1.42283	9.00693e-18	4.0492e-15	CG45060	GD24557 [Drosophila simulans]
FBgn0005391	0.737433	4.39212e-17	1.89227e-14	Yp2	yolk protein 2, isoform B [Drosophila melanogaster]
FBgn0013276	-0.532849	1.30822e-16	5.41079e-14	Hsp70Ab	Heat-shock-protein-70Ab [Drosophila melanogaster]
MSTRG.7684	1.4386	1.15066e-15	4.57609e-13	--	--
FBgn0040350	0.776443	1.27249e-15	4.69958e-13	CG3690	FI13053p, partial [Drosophila melanogaster]
FBgn0013278	-0.549484	1.30882e-15	4.69958e-13	Hsp70Bb	Heat-shock-protein-70Bb [Drosophila melanogaster]
FBgn0000079	-0.713309	1.31806e-15	4.69958e-13	Amy-p	amylase proximal, isoform B [Drosophila melanogaster]
FBgn0038973	0.75385	1.36933e-15	4.71964e-13	Pebp1	Phosphatidylethanolamine-binding protein 1 [Drosophila melanogaster]
FBgn0039091	1.00891	1.92581e-15	6.4235e-13	CG10182	uncharacterized protein Dmel_CG10182 [Drosophila melanogaster]
FBgn0063497	-0.663108	5.57156e-15	1.80031e-12	GstE3	glutathione S transferase E3 [Drosophila melanogaster]
FBgn0033981	-1.11363	6.28802e-15	1.97025e-12	Cyp6a21	Cyp6a21 [Drosophila melanogaster]
FBgn0037724	-0.567326	9.33285e-15	2.78057e-12	Fst	frost protein [Drosophila melanogaster]
FBgn0035620	0.809831	9.41198e-15	2.78057e-12	Alp9	alkaline phosphatase 9, isoform B [Drosophila melanogaster]
FBgn0038542	-1.10841	1.2737e-14	3.65835e-12	TyrR	tyramine receptor, isoform B [Drosophila melanogaster]
FBgn0259140	-1.28339	1.98706e-14	5.55302e-12	CG42255	uncharacterized protein Dmel_CG42255 [Drosophila melanogaster]
FBgn0034480	-1.14215	3.5438e-14	9.64286e-12	CG16898	uncharacterized protein Dmel_CG16898 [Drosophila melanogaster]
FBgn0001233	-0.476377	3.79948e-14	1.00735e-11	Hsp83	heat shock protein 83, isoform B [Drosophila melanogaster]
FBgn0051259	1.01693	4.3643e-14	1.11764e-11	CG31259	uncharacterized protein Dmel_CG31259, isoform B [Drosophila melanogaster]
FBgn0001168	-0.602564	4.43166e-14	1.11764e-11	h	hairy [Drosophila simulans]
FBgn0032264	-0.662355	5.03347e-14	1.23919e-11	Lip4	--
FBgn0050035	-0.5123	5.29135e-14	1.27239e-11	Tret1-1	trehalose transporter 1-1, isoform A [Drosophila melanogaster]
FBgn0038337	0.698209	7.72213e-14	1.8147e-11	CG6125	RE06328p, partial [Drosophila melanogaster]
FBgn0243512	-0.614011	7.96668e-14	1.83057e-11	puc	puckered, isoform A [Drosophila melanogaster]
FBgn0086265	1.83909	8.93151e-14	2.00765e-11	psd	palisade, isoform B [Drosophila melanogaster]
FBgn0001297	-0.534163	1.34715e-13	2.96373e-11	kay	kayak, isoform F [Drosophila melanogaster]
FBgn0036935	1.28347	1.41387e-13	3.0457e-11	CG14186	uncharacterized protein Dmel_CG14186 [Drosophila melanogaster]
FBgn0031571	-0.723749	1.62728e-13	3.4339e-11	bark	bark beetle, isoform B [Drosophila melanogaster]
FBgn0036262	0.747863	1.80707e-13	3.73702e-11	CG6910	uncharacterized protein Dmel_CG6910, isoform B [Drosophila melanogaster]
FBgn0032652	0.918105	2.21318e-13	4.48711e-11	CG6870	--
FBgn0050360	-1.15503	2.31144e-13	4.59622e-11	Mal-A6	maltase A6, isoform D [Drosophila melanogaster]
FBgn0015039	0.847414	2.83621e-13	5.53329e-11	Cyp9b2	cytochrome P450-9b2 [Drosophila melanogaster]
FBgn0010497	0.673462	5.67084e-13	1.08586e-10	dmGlut	dietary and metabolic glutamate transporter [Drosophila melanogaster]
FBgn0030596	1.84121	5.99465e-13	1.12699e-10	CG12398	FI24332p1, partial [Drosophila melanogaster]
FBgn0250869	-0.54163	6.31329e-13	1.1657e-10	CG42240	uncharacterized protein Dmel_CG42240, isoform A [Drosophila melanogaster]
FBgn0030558	-1.18427	6.55785e-13	1.18962e-10	CG1461	uncharacterized protein Dmel_CG1461, isoform B [Drosophila melanogaster]
FBgn0283437	-1.47312	1.25731e-12	2.24149e-10	PPO1	prophenoloxidase 1 [Drosophila melanogaster]
FBgn0034479	-0.595591	1.67032e-12	2.92731e-10	CG8654	uncharacterized protein Dmel_CG8654, isoform B [Drosophila melanogaster]
FBgn0032139	-0.732686	2.33319e-12	4.02086e-10	CG13116	--
FBgn0030773	0.754188	3.51631e-12	5.96044e-10	CG9676	uncharacterized protein Dmel_CG9676 [Drosophila melanogaster]
FBgn0265182	1.02774	4.42374e-12	7.37766e-10	CG44247	uncharacterized protein Dmel_CG44247, isoform B [Drosophila melanogaster]
FBgn0039787	0.789713	7.21997e-12	1.18499e-09	CG9702	uncharacterized protein Dmel_CG9702, isoform B [Drosophila melanogaster]
FBgn0030013	-0.623088	1.03267e-11	1.66841e-09	GIIIspla2	LD41157p, partial [Drosophila melanogaster]
FBgn0000489	0.833189	1.39553e-11	2.21996e-09	Pka-C3	protein kinase, cAMP-dependent, catalytic subunit 3, isoform B [Drosophila melanogaster]
FBgn0040211	-1.32321	1.63445e-11	2.56065e-09	hgo	homogentisate 1,2-dioxygenase [Drosophila melanogaster]
FBgn0052702	-0.772706	1.74889e-11	2.69903e-09	Cubn	cubilin [Drosophila melanogaster]
FBgn0067102	-0.54131	2.15295e-11	3.27375e-09	GlcT	glucosylceramide synthase [Drosophila melanogaster]
FBgn0034490	0.709705	2.4357e-11	3.65002e-09	CG9864	uncharacterized protein Dmel_CG9864, isoform B [Drosophila melanogaster]
FBgn0015035	-0.729471	2.90299e-11	4.26144e-09	Cyp4e3	cytochrome P450-4e3 [Drosophila melanogaster]
FBgn0040502	0.858312	2.92613e-11	4.26144e-09	CG8343	uncharacterized protein Dmel_CG8343 [Drosophila melanogaster]
FBgn0086708	-0.486295	3.24978e-11	4.66704e-09	stv	starvin, isoform E [Drosophila melanogaster]
FBgn0039471	-0.430827	4.4188e-11	6.25896e-09	CG6295	uncharacterized protein Dmel_CG6295 [Drosophila melanogaster]
FBgn0010397	-0.496311	6.11601e-11	8.54588e-09	LamC	lamin C, isoform B [Drosophila melanogaster]
FBgn0286723	-1.80669	7.50733e-11	1.03501e-08	hll	heimdall [Drosophila melanogaster]
FBgn0250757	0.559496	9.07136e-11	1.23418e-08	CG42235	uncharacterized protein Dmel_CG42235, isoform D [Drosophila melanogaster]
FBgn0040993	1.15808	9.52577e-11	1.26277e-08	CG17325	uncharacterized protein Dmel_CG17325, isoform B [Drosophila melanogaster]
FBgn0259201	1.15808	9.52577e-11	1.26277e-08	CG42305	uncharacterized protein Dmel_CG42305, isoform A [Drosophila melanogaster]
FBgn0031306	0.751718	9.95853e-11	1.30343e-08	CG4577	uncharacterized protein Dmel_CG4577, isoform B [Drosophila melanogaster]
FBgn0046114	-0.60381	1.01279e-10	1.30903e-08	Gclm	Glutamate-cysteine ligase modifier subunit, isoform B [Drosophila melanogaster]
FBgn0264253	2.38429	1.10575e-10	1.41154e-08	Send2	MIP16540p, partial [Drosophila melanogaster]
FBgn0003067	-0.468076	1.16035e-10	1.44555e-08	Pepck1	phosphoenolpyruvate carboxykinase 1 [Drosophila melanogaster]
FBgn0266488	-0.468076	1.16035e-10	1.44555e-08	CG45087	uncharacterized protein Dmel_CG45087 [Drosophila melanogaster]
FBgn0013279	-0.621645	1.25243e-10	1.54168e-08	Hsp70Bc	Heat-shock-protein-70Bb [Drosophila melanogaster]
FBgn0004516	0.808464	1.44328e-10	1.7557e-08	Gad1	glutamic acid decarboxylase 1, isoform D [Drosophila melanogaster]
FBgn0037934	0.867586	1.49268e-10	1.78883e-08	CG6830	uncharacterized protein Dmel_CG6830 [Drosophila melanogaster]
FBgn0263748	0.725121	1.50511e-10	1.78883e-08	CG43673	uncharacterized protein Dmel_CG43673 [Drosophila melanogaster]
FBgn0039342	-0.752014	2.10928e-10	2.47841e-08	CG5107	uncharacterized protein Dmel_CG5107 [Drosophila melanogaster]
FBgn0038194	-0.648002	2.33759e-10	2.71581e-08	Cyp6d5	Cyp6d5 [Drosophila melanogaster]
FBgn0013277	-0.466776	2.785e-10	3.19966e-08	Hsp70Ba	Heat-shock-protein-70Ba [Drosophila melanogaster]
FBgn0050272	0.986348	2.89738e-10	3.29218e-08	MFS1	major facilitator superfamily transporter 1 [Drosophila melanogaster]
FBgn0033787	-0.456032	4.96742e-10	5.58295e-08	CG13321	uncharacterized protein Dmel_CG13321, isoform B [Drosophila melanogaster]
FBgn0035923	-0.664277	6.6668e-10	7.41234e-08	CG6511	uncharacterized protein Dmel_CG6511, isoform B [Drosophila melanogaster]
FBgn0028978	-0.473837	7.49585e-10	8.24544e-08	trbl	tribbles [Drosophila melanogaster]
FBgn0031689	-0.626688	1.09419e-09	1.19094e-07	Cyp28d1	Cyp28d1 [Drosophila melanogaster]
FBgn0034718	-0.538055	1.63631e-09	1.76244e-07	wdp	windpipe, isoform E [Drosophila melanogaster]
FBgn0054043	0.89532	1.846e-09	1.96779e-07	CG34043	IP21193p, partial [Drosophila melanogaster]
FBgn0034741	1.12234	2.08642e-09	2.20139e-07	CG4269	uncharacterized protein Dmel_CG4269, isoform C [Drosophila melanogaster]
FBgn0042105	-0.7383	3.11287e-09	3.25122e-07	CG18748	uncharacterized protein Dmel_CG18748, isoform C [Drosophila melanogaster]
FBgn0041194	0.580368	3.35024e-09	3.46414e-07	Prat2	phosphoribosylamidotransferase 2, isoform B [Drosophila melanogaster]
FBgn0036831	-0.912699	3.45868e-09	3.54087e-07	CG6839	uncharacterized protein Dmel_CG6839 [Drosophila melanogaster]
FBgn0036461	0.629657	3.8594e-09	3.91237e-07	Zip71B	Zinc/iron regulated transporter-related protein 71B, isoform B [Drosophila melanogaster]
FBgn0030608	-0.394575	4.37337e-09	4.39035e-07	Lsd-2	lipid storage droplet-2, isoform A [Drosophila melanogaster]
FBgn0040942	-0.732064	5.41088e-09	5.37966e-07	CG12643	uncharacterized protein Dmel_CG12643 [Drosophila melanogaster]
FBgn0035348	0.719001	5.90531e-09	5.77276e-07	CG16758	uncharacterized protein Dmel_CG16758, isoform H [Drosophila melanogaster]
FBgn0052529	-0.517296	5.91791e-09	5.77276e-07	Hers	histone gene-specific epigenetic repressor in late S phase, isoform E [Drosophila melanogaster]
FBgn0038914	0.856456	6.32691e-09	6.06114e-07	fit	female-specific independent of transformer [Drosophila melanogaster]
FBgn0000565	0.59322	6.33079e-09	6.06114e-07	Eip71CD	Ecdysone-induced protein 28/29kD, isoform G [Drosophila melanogaster]
FBgn0025833	1.65322	6.66255e-09	6.32025e-07	CG8910	uncharacterized protein Dmel_CG8910 [Drosophila melanogaster]
FBgn0263081	-0.540416	7.44245e-09	6.99591e-07	CG43349	***** No hits found *****
FBgn0001987	-0.479845	1.36336e-08	1.27001e-06	Gli	gliotactin, isoform A [Drosophila melanogaster]
FBgn0029896	0.52379	1.51962e-08	1.40293e-06	CG3168	uncharacterized protein Dmel_CG3168, isoform D [Drosophila melanogaster]
FBgn0034143	0.841302	1.61576e-08	1.47683e-06	CG8303	uncharacterized protein Dmel_CG8303, isoform D [Drosophila melanogaster]
FBgn0037684	-0.574268	1.62823e-08	1.47683e-06	Srr	serine racemase, isoform B [Drosophila melanogaster]
FBgn0029966	2.46304	1.66606e-08	1.498e-06	Ir7c	ionotropic receptor 7c, isoform B [Drosophila melanogaster]
FBgn0033367	-1.21315	1.89813e-08	1.68881e-06	PPO2	prophenoloxidase 2 [Drosophila melanogaster]
FBgn0040299	-0.572639	1.91093e-08	1.68881e-06	Myo28B1	myosin 28B1, isoform B [Drosophila melanogaster]
FBgn0050047	0.922332	1.95275e-08	1.71114e-06	CG30047	uncharacterized protein Dmel_CG30047 [Drosophila melanogaster]
FBgn0086676	-0.39856	2.15984e-08	1.8767e-06	spin	spinster, isoform D [Drosophila melanogaster]
FBgn0039419	-0.516336	2.52387e-08	2.17473e-06	CG12290	uncharacterized protein Dmel_CG12290, isoform B [Drosophila melanogaster]
FBgn0286198	0.623698	2.633e-08	2.24676e-06	LKRSDH	SD02276p, partial [Drosophila melanogaster]
FBgn0028550	-0.605327	2.65092e-08	2.24676e-06	Atf3	activating transcription factor 3, isoform C [Drosophila melanogaster]
FBgn0267408	-0.484436	2.81295e-08	2.36471e-06	AOX1	aldehyde oxidase 1 [Drosophila melanogaster]
FBgn0031000	-1.07461	3.81699e-08	3.18287e-06	Muc18B	mucin 18B, isoform B [Drosophila melanogaster]
FBgn0036772	-0.517202	4.19082e-08	3.46664e-06	CG5290	uncharacterized protein Dmel_CG5290 [Drosophila melanogaster]
FBgn0010357	-0.36541	4.6341e-08	3.80291e-06	betaTry	betaTrypsin, isoform B [Drosophila melanogaster]
FBgn0051354	-0.421744	5.3291e-08	4.33881e-06	Hsp70Bbb	Hsp70Bbb [Drosophila melanogaster]
FBgn0036015	0.869096	5.77343e-08	4.65469e-06	CG3088	uncharacterized protein Dmel_CG3088 [Drosophila melanogaster]
FBgn0001223	-0.536974	5.83623e-08	4.65469e-06	Hsp22	heat shock protein 22, isoform B [Drosophila melanogaster]
FBgn0050043	0.915608	5.85212e-08	4.65469e-06	CG30043	uncharacterized protein Dmel_CG30043 [Drosophila melanogaster]
FBgn0040001	-0.495971	7.04802e-08	5.56309e-06	FASN3	fatty acid synthase 3 [Drosophila melanogaster]
FBgn0036022	0.788232	7.15166e-08	5.60214e-06	CG8329	uncharacterized protein Dmel_CG8329 [Drosophila melanogaster]
FBgn0039789	0.925771	9.09841e-08	7.0735e-06	CG9717	uncharacterized protein Dmel_CG9717 [Drosophila melanogaster]
FBgn0031535	-0.450352	9.60454e-08	7.41126e-06	CG12795	uncharacterized protein Dmel_CG12795 [Drosophila melanogaster]
FBgn0036738	-0.520229	9.71557e-08	7.4414e-06	CG7542	uncharacterized protein Dmel_CG7542, isoform B [Drosophila melanogaster]
FBgn0017558	-0.439802	1.11939e-07	8.51067e-06	Pdk	pyruvate dehydrogenase kinase, isoform B [Drosophila melanogaster]
FBgn0286785	-0.442476	1.14483e-07	8.64052e-06	scb	scab, isoform B [Drosophila melanogaster]
FBgn0031522	0.688017	1.19314e-07	8.93991e-06	CG3285	uncharacterized protein Dmel_CG3285, isoform B [Drosophila melanogaster]
FBgn0034471	0.722994	1.30252e-07	9.68928e-06	Obp56e	Odorant-binding protein 56e, isoform A [Drosophila melanogaster]
FBgn0001291	-0.380377	1.62887e-07	1.19216e-05	Jra	Jun-related antigen, isoform A [Drosophila melanogaster]
FBgn0002563	1.26447	1.63036e-07	1.19216e-05	Lsp1beta	larval serum protein 1 beta, isoform B [Drosophila melanogaster]
FBgn0033887	1.64224	1.63721e-07	1.19216e-05	St4	sulfotransferase 4, isoform B [Drosophila melanogaster]
FBgn0052103	-0.402056	1.65923e-07	1.19975e-05	SCaMC	short Calcium-binding mitochondrial carrier, isoform B [Drosophila melanogaster]
FBgn0031424	0.736658	1.68511e-07	1.21e-05	VGlut	vesicular glutamate transporter, isoform B [Drosophila melanogaster]
FBgn0005660	-0.636247	1.87916e-07	1.34004e-05	Ets21C	Ets at 21C, isoform C [Drosophila melanogaster]
FBgn0035495	0.546556	1.95741e-07	1.38627e-05	CG14989	uncharacterized protein Dmel_CG14989, isoform C [Drosophila melanogaster]
FBgn0033297	-0.873597	2.36443e-07	1.66314e-05	Mal-A8	FI18415p1, partial [Drosophila melanogaster]
FBgn0010228	-0.643869	2.38855e-07	1.66876e-05	HmgZ	HMG protein Z, isoform C [Drosophila melanogaster]
FBgn0054040	-1.72386	2.59724e-07	1.80238e-05	CG34040	uncharacterized protein Dmel_CG34040 [Drosophila melanogaster]
FBgn0001230	-0.356348	2.63823e-07	1.81862e-05	Hsp68	heat shock protein 68 [Drosophila melanogaster]
FBgn0032435	-0.476255	2.88859e-07	1.97801e-05	Oatp33Eb	--
FBgn0267964	7.22882	3.13778e-07	2.13452e-05	CG46244	uncharacterized protein Dmel_CG46244 [Drosophila melanogaster]
FBgn0034394	0.517948	3.50763e-07	2.37052e-05	CG15096	uncharacterized protein Dmel_CG15096, isoform A [Drosophila melanogaster]
FBgn0033484	0.602628	4.60315e-07	3.09069e-05	CG2269	uncharacterized protein Dmel_CG2269, isoform D [Drosophila melanogaster]
FBgn0037563	0.574952	4.90345e-07	3.27108e-05	CG11672	uncharacterized protein Dmel_CG11672, isoform B [Drosophila melanogaster]
FBgn0063493	-0.703012	6.47022e-07	4.2886e-05	GstE7	LD04004p, partial [Drosophila melanogaster]
FBgn0001218	-0.393548	6.55996e-07	4.32038e-05	Hsc70-3	heat shock 70-kDa protein cognate 3, isoform E [Drosophila melanogaster]
FBgn0034715	1.40234	6.82616e-07	4.46724e-05	Oatp58Db	organic anion transporting polypeptide 58Db [Drosophila melanogaster]
FBgn0004575	0.671266	6.94833e-07	4.5186e-05	Syn	synapsin, isoform E [Drosophila melanogaster]
FBgn0031034	-0.821947	7.39964e-07	4.78202e-05	CG14205	uncharacterized protein Dmel_CG14205 [Drosophila melanogaster]
FBgn0036147	-0.456266	8.47328e-07	5.44185e-05	Plod	procollagen lysyl hydroxylase, isoform A [Drosophila melanogaster]
FBgn0014469	-0.376139	1.01487e-06	6.47761e-05	Cyp4e2	cytochrome P450-4e2, isoform B [Drosophila melanogaster]
FBgn0001208	-0.482519	1.0504e-06	6.66327e-05	Hn	henna, isoform C [Drosophila melanogaster]
FBgn0042104	-0.683143	1.2087e-06	7.62073e-05	CG18747	uncharacterized protein Dmel_CG18747 [Drosophila melanogaster]
FBgn0031294	0.458592	1.23441e-06	7.73565e-05	IA-2	IA-2 protein tyrosine phosphatase, isoform C [Drosophila melanogaster]
FBgn0030960	0.644479	1.40206e-06	8.73331e-05	Atg101	Autophagy-related 101 [Drosophila melanogaster]
MSTRG.7124	-0.960853	1.42702e-06	8.83554e-05	--	--
FBgn0031897	-0.456416	1.46796e-06	9.03493e-05	CG13784	--
FBgn0038236	-0.680775	1.497e-06	9.13015e-05	Cyp313a1	MIP05930p, partial [Drosophila melanogaster]
FBgn0028983	-0.448061	1.50109e-06	9.13015e-05	Spn55B	serpin 55B [Drosophila melanogaster]
FBgn0034759	-0.748078	1.56375e-06	9.45567e-05	CG13511	MIP32409p1, partial [Drosophila melanogaster]
FBgn0004242	0.677435	1.57828e-06	9.48802e-05	Syt1	synaptotagmin 1, isoform A [Drosophila melanogaster]
FBgn0265185	-0.402424	2.18857e-06	0.000130808	CG44250	uncharacterized protein Dmel_CG44250, isoform C [Drosophila melanogaster]
FBgn0003308	0.608411	2.3078e-06	0.000137142	ry	rosy [Drosophila melanogaster]
FBgn0032006	-0.379768	2.50501e-06	0.00014801	Pvr	--
FBgn0038641	1.06895	2.86601e-06	0.000168378	ChT	uncharacterized protein Dmel_CG7708, isoform A [Drosophila melanogaster]
FBgn0035544	0.99037	2.93093e-06	0.000170293	CG15021	uncharacterized protein Dyak_GE21449 [Drosophila yakuba]
FBgn0011288	0.619857	2.93155e-06	0.000170293	Snap25	Synaptosomal-associated protein 25kDa, isoform A [Drosophila melanogaster]
FBgn0283741	-0.42715	3.00161e-06	0.000173389	prage	prage, isoform E [Drosophila melanogaster]
FBgn0032587	-0.417281	3.05768e-06	0.000175647	CG5953	--
FBgn0038391	0.64412	3.3896e-06	0.000193638	GATAe	GATAe, isoform A [Drosophila melanogaster]
FBgn0037646	-0.584454	3.52795e-06	0.000200434	CAHbeta	carbonic anhydrase beta, isoform A [Drosophila melanogaster]
FBgn0050456	-0.353219	3.57734e-06	0.00020213	CG30456	uncharacterized protein Dmel_CG30456, isoform B [Drosophila melanogaster]
FBgn0002962	0.420191	3.64712e-06	0.000204952	nos	nanos, isoform A [Drosophila melanogaster]
FBgn0033234	0.607121	4.01856e-06	0.000224605	MFS12	major facilitator superfamily transporter 12, isoform A [Drosophila melanogaster]
FBgn0042102	-0.499876	4.2174e-06	0.000234451	CG18745	uncharacterized protein Dmel_CG18745 [Drosophila melanogaster]
FBgn0051106	0.69793	4.34612e-06	0.000239509	CG31106	uncharacterized protein Dmel_CG31106 [Drosophila melanogaster]
FBgn0003979	1.83675	4.35829e-06	0.000239509	Vm26Aa	vitelline membrane 26Aa, isoform B [Drosophila melanogaster]
FBgn0032401	-0.706515	4.37788e-06	0.000239509	Plzf	--
FBgn0031220	-0.41837	4.40626e-06	0.000239793	CG4822	uncharacterized protein Dmel_CG4822, isoform E [Drosophila melanogaster]
FBgn0083972	-0.779542	4.46034e-06	0.000241466	CG34136	uncharacterized protein Dmel_CG34136 [Drosophila melanogaster]
FBgn0002937	0.981751	4.62062e-06	0.00024884	ninaB	neither inactivation nor afterpotential B [Drosophila melanogaster]
MSTRG.6746	0.70442	4.74261e-06	0.000254086	MRPS5	--
MSTRG.1590	0.485906	5.6739e-06	0.000302413	GIP	--
FBgn0265186	-0.313367	6.00848e-06	0.000318603	CG44251	uncharacterized protein Dmel_CG44251, isoform A [Drosophila melanogaster]
FBgn0085455	0.842726	6.80071e-06	0.000358772	CG34426	IP11847p, partial [Drosophila melanogaster]
FBgn0000120	0.550968	6.94342e-06	0.000364442	Arr1	arrestin 1, isoform B [Drosophila melanogaster]
FBgn0003396	-0.349045	7.57111e-06	0.00039538	shn	schnurri, isoform D [Drosophila melanogaster]
FBgn0052425	0.458631	7.61868e-06	0.000395865	CG32425	uncharacterized protein Dmel_CG32425, isoform A [Drosophila melanogaster]
FBgn0038820	-0.536299	7.97955e-06	0.000411214	CG4000	uncharacterized protein Dmel_CG4000 [Drosophila melanogaster]
FBgn0027111	0.682578	7.99362e-06	0.000411214	miple1	midkine and pleiotrophin 1, isoform C [Drosophila melanogaster]
FBgn0010114	0.565647	8.33882e-06	0.000426849	hig	hikaru genki, isoform A [Drosophila melanogaster]
FBgn0030929	-0.3362	8.44886e-06	0.000430351	CG15043	uncharacterized protein Dmel_CG15043, isoform B [Drosophila melanogaster]
FBgn0030482	-0.367345	8.85386e-06	0.000448769	CG1673	uncharacterized protein Dmel_CG1673 [Drosophila melanogaster]
FBgn0085358	-0.731488	9.03355e-06	0.000455643	Diedel3	diedel 3, isoform A [Drosophila melanogaster]
FBgn0086677	1.16601	9.31158e-06	0.000467387	jeb	jelly belly, isoform B [Drosophila melanogaster]
FBgn0036449	-0.323098	9.52769e-06	0.000475924	bmm	brummer, isoform B [Drosophila melanogaster]
FBgn0037697	-1.08632	9.72803e-06	0.000483595	GstZ2	GH17960p, partial [Drosophila melanogaster]
FBgn0266431	-0.518554	1.02528e-05	0.000507242	CG45061	uncharacterized protein Dmel_CG45061 [Drosophila melanogaster]
FBgn0031935	-0.97311	1.0483e-05	0.000516161	CG13793	--
FBgn0261615	0.520138	1.07053e-05	0.000524612	CG42704	MIP05985p, partial [Drosophila melanogaster]
FBgn0015575	-0.393047	1.08935e-05	0.000531316	alpha-Est7	alpha-Esterase-7 [Drosophila melanogaster]
FBgn0025454	-0.410109	1.13566e-05	0.000551303	Cyp6g1	Cyp6g1, isoform B [Drosophila melanogaster]
MSTRG.10659	0.52614	1.15731e-05	0.000559185	Tf2-12	--
FBgn0037754	0.937069	1.18298e-05	0.000568933	CG8500	uncharacterized protein Dmel_CG8500, isoform B [Drosophila melanogaster]
FBgn0037151	-0.652712	1.21491e-05	0.000581582	CG7130	uncharacterized protein Dmel_CG7130 [Drosophila melanogaster]
FBgn0004047	0.404564	1.27463e-05	0.000607359	Yp3	yolk protein 3, isoform B [Drosophila melanogaster]
FBgn0027611	-0.32199	1.37935e-05	0.000654242	LManII	lysosomal alpha-mannosidase II, isoform A [Drosophila melanogaster]
FBgn0262608	0.628959	1.48069e-05	0.000699103	CG43134	uncharacterized protein Dmel_CG43134, isoform B [Drosophila melanogaster]
FBgn0259108	0.574978	1.51984e-05	0.000714327	futsch	futsch, isoform C [Drosophila melanogaster]
FBgn0051221	0.634445	1.53487e-05	0.000718122	CG31221	PREDICTED: IDLSRF-like peptide [Drosophila ficusphila]
FBgn0020416	0.405337	1.66139e-05	0.00077382	Idgf1	imaginal disc growth factor 1 [Drosophila melanogaster]
FBgn0031645	-0.330714	1.69935e-05	0.000787949	CG3036	uncharacterized protein Dmel_CG3036, isoform B [Drosophila melanogaster]
FBgn0036232	-0.344428	1.72292e-05	0.000795314	CG14125	uncharacterized protein Dmel_CG14125, isoform B [Drosophila melanogaster]
FBgn0038846	0.835061	1.79249e-05	0.000823749	CG5697	uncharacterized protein Dmel_CG5697, isoform B [Drosophila melanogaster]
FBgn0051410	0.700931	1.8448e-05	0.000844036	Npc2e	Niemann-Pick type C-2e [Drosophila melanogaster]
FBgn0030294	-0.383676	1.85457e-05	0.000844771	Pa1	PTIP associated 1 [Drosophila melanogaster]
FBgn0004228	-0.427851	1.88418e-05	0.000854491	mex1	midgut expression 1, isoform B [Drosophila melanogaster]
FBgn0262536	0.621557	1.96983e-05	0.000887068	CG43090	uncharacterized protein Dmel_CG43090 [Drosophila melanogaster]
FBgn0262728	0.50267	1.97317e-05	0.000887068	Pal2	Peptidyl-alpha-hydroxyglycine-alpha-amidating lyase 2, isoform E [Drosophila melanogaster]
FBgn0010651	-0.361997	2.03944e-05	0.00091289	MFS14	major facilitator superfamily transporter 14, isoform C [Drosophila melanogaster]
FBgn0004045	0.36289	2.064e-05	0.000918209	Yp1	yolk protein 1, isoform B [Drosophila melanogaster]
FBgn0000568	-0.4041	2.07733e-05	0.000918209	Eip75B	Ecdysone-induced protein 75B, isoform E [Drosophila melanogaster]
FBgn0036659	0.713374	2.07796e-05	0.000918209	CG9701	uncharacterized protein Dmel_CG9701 [Drosophila melanogaster]
FBgn0039051	-0.475029	2.20984e-05	0.000972328	CG17109	uncharacterized protein Dmel_CG17109, isoform B [Drosophila melanogaster]
FBgn0037107	1.12959	2.23342e-05	0.000978542	CG7166	uncharacterized protein Dmel_CG7166, isoform C [Drosophila melanogaster]
FBgn0039769	-0.388322	2.29572e-05	0.00100159	CG15534	uncharacterized protein Dmel_CG15534 [Drosophila melanogaster]
FBgn0050489	-0.480405	2.39481e-05	0.00104044	Cyp12d1-p	Cyp12d1-p, isoform B [Drosophila melanogaster]
FBgn0033216	-1.04302	2.62812e-05	0.00113702	CG1946	uncharacterized protein Dmel_CG1946 [Drosophila melanogaster]
FBgn0032840	0.59821	2.78524e-05	0.00119997	sNPF	short neuropeptide F precursor [Drosophila melanogaster]
FBgn0033397	0.687729	2.80543e-05	0.00120366	Cyp4p3	Cyp4p3 [Drosophila melanogaster]
FBgn0036876	0.50318	2.83083e-05	0.00120954	CG9451	uncharacterized protein Dmel_CG9451, isoform B [Drosophila melanogaster]
FBgn0031970	-0.710213	2.8532e-05	0.00121401	CG7227	--
FBgn0051266	0.501818	2.86478e-05	0.00121401	CG31266	IP08455p [Drosophila melanogaster]
FBgn0263106	-0.281399	2.93857e-05	0.0012402	DnaJ-1	DnaJ-like-1, isoform A [Drosophila melanogaster]
FBgn0016684	0.4889	3.04845e-05	0.00127905	NaPi-T	Na[+]-dependent inorganic phosphate cotransporter, isoform B [Drosophila melanogaster]
FBgn0035265	0.767128	3.05538e-05	0.00127905	PIG-Wb	phosphatidylinositol glycan anchor biosynthesis class W b, isoform B [Drosophila melanogaster]
FBgn0016013	-0.717251	3.19443e-05	0.00133187	Faa	fumarylacetoacetase [Drosophila melanogaster]
FBgn0270928	0.811986	3.42621e-05	0.00142277	VAChT	vesicular acetylcholine transporter [Drosophila melanogaster]
FBgn0003943	-0.340189	3.79429e-05	0.00156932	Ubi-p63E	AT20865p [Drosophila melanogaster]
FBgn0033224	-0.325876	4.26536e-05	0.00175712	Nop17l	Nop17 like, isoform A [Drosophila melanogaster]
FBgn0261675	0.585593	4.66758e-05	0.00191519	Npc1b	Niemann-Pick type C-1b [Drosophila melanogaster]
FBgn0032283	1.06757	4.83515e-05	0.00197611	CG7296	--
FBgn0031695	-0.539148	4.96281e-05	0.00202029	Cyp4ac3	Cyp4ac3 [Drosophila melanogaster]
FBgn0034247	-0.639949	5.35851e-05	0.00217282	CG6484	uncharacterized protein Dmel_CG6484 [Drosophila melanogaster]
FBgn0085362	2.01134	5.38521e-05	0.00217512	Vml	vitelline membrane-like, isoform A [Drosophila melanogaster]
FBgn0031517	0.380446	5.42857e-05	0.0021841	CG15406	uncharacterized protein Dmel_CG15406 [Drosophila melanogaster]
FBgn0262127	-0.433389	5.58308e-05	0.00223729	kibra	kibra, isoform A [Drosophila melanogaster]
FBgn0086266	2.93842	5.60405e-05	0.00223729	Vm26Ac	vitelline membrane 26Aac [Drosophila melanogaster]
FBgn0046763	0.49	5.97007e-05	0.00237425	CG17278	uncharacterized protein Dmel_CG17278 [Drosophila melanogaster]
FBgn0067783	-0.412361	6.1805e-05	0.00244852	DPCoAC	dephosphocoenzyme A carrier, isoform F [Drosophila melanogaster]
FBgn0033047	0.360889	6.56478e-05	0.00259083	CG7882	uncharacterized protein Dmel_CG7882, isoform C [Drosophila melanogaster]
FBgn0016076	-0.33596	6.61231e-05	0.00259967	vri	vrille, isoform D [Drosophila melanogaster]
FBgn0053346	-0.866276	6.69886e-05	0.00262372	CG33346	--
FBgn0003068	-0.655206	6.83721e-05	0.0026678	per	period, isoform B [Drosophila melanogaster]
FBgn0025837	0.59197	7.07868e-05	0.00275164	CG17636	uncharacterized protein Dmel_CG17636, isoform C [Drosophila melanogaster]
FBgn0029810	0.506377	7.11216e-05	0.0027543	CG12239	uncharacterized protein Dmel_CG12239 [Drosophila melanogaster]
FBgn0035538	0.722903	7.30332e-05	0.00281777	DopEcR	Dopamine/Ecdysteroid receptor, isoform C [Drosophila melanogaster]
FBgn0052017	0.616785	7.65898e-05	0.00294401	CG32017	uncharacterized protein Dmel_CG32017, isoform C [Drosophila melanogaster]
MSTRG.11633	0.531457	7.69251e-05	0.00294595	GIP	--
FBgn0030300	-0.539815	8.29227e-05	0.00316391	Sk1	sphingosine kinase 1, isoform A [Drosophila melanogaster]
FBgn0086443	0.332872	8.4763e-05	0.00322224	AsnRS	Asparaginyl-tRNA synthetase, isoform B [Drosophila melanogaster]
FBgn0041094	-0.319775	8.55598e-05	0.00324062	scyl	scylla, isoform A [Drosophila melanogaster]
FBgn0027601	-0.279628	8.86504e-05	0.00334542	pdgy	pudgy, isoform B [Drosophila melanogaster]
FBgn0028476	-0.300947	9.19042e-05	0.0034556	Usp1	ubiquitin specific protease 1, isoform E [Drosophila melanogaster]
FBgn0083956	-0.524595	9.57656e-05	0.00358774	CG34120	uncharacterized protein Dmel_CG34120, isoform E [Drosophila melanogaster]
FBgn0033294	-0.669092	9.92703e-05	0.00370562	Mal-A4	maltase A4 [Drosophila melanogaster]
FBgn0262574	-0.813347	9.96677e-05	0.00370706	CG43114	uncharacterized protein Dmel_CG43114, isoform A [Drosophila melanogaster]
FBgn0038752	-0.513437	0.000102905	0.00381377	CG4462	uncharacterized protein Dmel_CG4462 [Drosophila melanogaster]
FBgn0037443	-0.293749	0.000104074	0.00384329	Dmtn	dementin, isoform H [Drosophila melanogaster]
FBgn0028875	1.18521	0.000104913	0.00386049	nAChRalpha5	nicotinic acetylcholine receptor alpha5, isoform H [Drosophila melanogaster]
FBgn0001225	-0.294715	0.00011398	0.004172	Hsp26	heat shock protein 26, isoform B [Drosophila melanogaster]
FBgn0036713	0.983104	0.000114185	0.004172	Mip	myoinhibiting peptide precursor [Drosophila melanogaster]
FBgn0036732	-0.434926	0.000117382	0.00427369	Oatp74D	organic anion transporting polypeptide 74D, isoform C [Drosophila melanogaster]
FBgn0005626	0.797956	0.000118936	0.00430593	ple	pale, isoform C [Drosophila melanogaster]
FBgn0019940	0.626104	0.0001191	0.00430593	Rh6	rhodopsin 6 [Drosophila melanogaster]
FBgn0013467	0.621698	0.000131539	0.00473907	igl	GD11100 [Drosophila simulans]
FBgn0087002	-0.253687	0.000137549	0.00493839	apolpp	apolipophorin, isoform B [Drosophila melanogaster]
FBgn0031801	-0.335205	0.000147835	0.00528932	CG9498	--
FBgn0039297	-0.635881	0.000151492	0.00540147	CG11852	uncharacterized protein Dmel_CG11852 [Drosophila melanogaster]
FBgn0029898	-0.560019	0.000153339	0.00544854	CG14439	uncharacterized protein Dmel_CG14439, isoform B [Drosophila melanogaster]
FBgn0024995	0.456282	0.000161795	0.00572932	CG2680	uncharacterized protein Dmel_CG2680 [Drosophila melanogaster]
FBgn0030808	-0.317382	0.000168818	0.0059576	RhoGAP15B	Rho GTPase activating protein at 15B, isoform C [Drosophila melanogaster]
FBgn0032285	-0.452364	0.000175832	0.00618403	CG17108	--
FBgn0028426	0.543184	0.000179616	0.00629553	RNaseZ	ribonuclease Z [Drosophila melanogaster]
FBgn0036359	-1.06914	0.00018022	0.00629553	CG14105	uncharacterized protein Dmel_CG14105 [Drosophila melanogaster]
FBgn0028400	0.455715	0.000184535	0.00642455	Syt4	synaptotagmin 4 [Drosophila melanogaster]
FBgn0025595	-0.350438	0.000187204	0.0064956	AkhR	adipokinetic hormone receptor, isoform C [Drosophila melanogaster]
FBgn0033889	-0.347386	0.000187943	0.00649945	CG6701	uncharacterized protein Dmel_CG6701, isoform B [Drosophila melanogaster]
FBgn0030270	-0.436178	0.000190783	0.00657566	CG15199	uncharacterized protein Dmel_CG15199, isoform B [Drosophila melanogaster]
FBgn0023179	0.53156	0.000193381	0.00664305	amon	amontillado [Drosophila melanogaster]
FBgn0039325	-0.405459	0.000197217	0.00675238	CG10560	uncharacterized protein Dmel_CG10560 [Drosophila melanogaster]
FBgn0035886	-0.444756	0.000202627	0.00691474	Jon66Ci	jonah 66Ci [Drosophila melanogaster]
FBgn0285954	-0.389254	0.000206094	0.00700318	caz	cabeza, isoform B [Drosophila melanogaster]
FBgn0024291	-0.287986	0.000206573	0.00700318	Sirt1	sirtuin 1 [Drosophila melanogaster]
FBgn0033820	-0.242898	0.000209297	0.00707231	CG4716	uncharacterized protein Dmel_CG4716, isoform C [Drosophila melanogaster]
FBgn0038136	0.400373	0.00022139	0.00745658	CG8774	LP07229p, partial [Drosophila melanogaster]
FBgn0261563	-0.614422	0.000229635	0.00769752	wb	wing blister, isoform B [Drosophila melanogaster]
FBgn0033051	-0.500596	0.000230032	0.00769752	Strica	Ser/Thr-rich caspase, isoform B [Drosophila melanogaster]
FBgn0002926	0.644082	0.000232923	0.0077691	ndl	nudel [Drosophila melanogaster]
FBgn0034470	0.394509	0.000236244	0.00785455	Obp56d	Odorant-binding protein 56d, isoform B [Drosophila melanogaster]
FBgn0284227	-1.15677	0.00025684	0.00851193	CG46311	uncharacterized protein Dmel_CG46311 [Drosophila melanogaster]
FBgn0011674	-0.380442	0.000262049	0.00865681	insc	inscuteable [Drosophila melanogaster]
FBgn0031702	-0.44008	0.000267886	0.00882148	fusl	fuseless, isoform D [Drosophila melanogaster]
FBgn0011837	-0.428181	0.00026999	0.00885944	Tis11	Tis11 zinc finger protein, isoform C [Drosophila melanogaster]
FBgn0029762	0.391088	0.000270753	0.00885944	NAAT1	nutrient amino acid transporter 1 [Drosophila melanogaster]
FBgn0050115	-0.364923	0.000274248	0.00892016	GEFmeso	guanine nucleotide exchange factor in mesoderm, isoform E [Drosophila melanogaster]
FBgn0026760	-0.586299	0.000274334	0.00892016	Tehao	tehao, isoform B [Drosophila melanogaster]
FBgn0039883	0.753644	0.000276682	0.0089683	RhoGAP100F	Rho GTPase activating protein at 100F, isoform D [Drosophila melanogaster]
FBgn0053056	0.426329	0.000281838	0.009085	CG33056	uncharacterized protein Dmel_CG33056, isoform A [Drosophila melanogaster]
FBgn0030999	0.313186	0.000282039	0.009085	Mur18B	mucin related 18B [Drosophila melanogaster]
FBgn0027528	-0.355716	0.000289907	0.00930944	goe	gone early, isoform C [Drosophila melanogaster]
FBgn0035049	-0.278742	0.000300135	0.00960804	Mmp1	matrix metalloproteinase 1, isoform C [Drosophila melanogaster]
FBgn0286516	-0.323238	0.000314603	0.0100401	aqz	aaquetzalli, isoform C [Drosophila melanogaster]
FBgn0034871	0.335691	0.000316414	0.0100668	CG3906	uncharacterized protein Dmel_CG3906 [Drosophila melanogaster]
FBgn0036622	0.336824	0.00033329	0.0105712	Agpat4	1-Acylglycerol-3-phosphate O-acyltransferase 4, isoform C [Drosophila melanogaster]
FBgn0051091	-1.14349	0.000341356	0.0107931	CG31091	uncharacterized protein Dmel_CG31091, isoform B [Drosophila melanogaster]
FBgn0033853	0.358012	0.000342374	0.0107931	CG6145	uncharacterized protein Dmel_CG6145, isoform C [Drosophila melanogaster]
FBgn0086359	0.344609	0.000346448	0.0108884	Invadolysin	invadolysin [Drosophila melanogaster]
FBgn0262867	-0.725378	0.000349182	0.010941	Ptr	Patched-related, isoform B [Drosophila melanogaster]
FBgn0263996	-1.04307	0.000350549	0.0109507	CG43739	***** No hits found *****
FBgn0032913	0.44309	0.000352058	0.0109647	CG9259	uncharacterized protein Dmel_CG9259, isoform B [Drosophila melanogaster]
FBgn0030847	-0.346698	0.000363292	0.0112806	CG12991	uncharacterized protein Dmel_CG12991, isoform E [Drosophila melanogaster]
FBgn0040723	-0.351904	0.000364753	0.0112921	CG5011	***** No hits found *****
FBgn0016975	0.586094	0.000369596	0.0113739	stnB	stoned B, isoform F [Drosophila melanogaster]
FBgn0016976	0.586094	0.000369596	0.0113739	stnA	stoned A, isoform C [Drosophila melanogaster]
FBgn0032797	0.438724	0.000380467	0.0116737	Hasp	Hig-anchoring scaffold protein, isoform G [Drosophila melanogaster]
FBgn0017448	0.39751	0.000381807	0.0116801	CG2187	uncharacterized protein Dmel_CG2187, isoform B [Drosophila melanogaster]
FBgn0053306	-0.448123	0.000385648	0.0117628	CG33306	uncharacterized protein Dmel_CG33306 [Drosophila melanogaster]
FBgn0267978	-0.493137	0.000389452	0.0118439	ap	apterous, isoform A [Drosophila melanogaster]
FBgn0051661	1.24994	0.000395413	0.0119899	CG31661	uncharacterized protein Dmel_CG31661 [Drosophila melanogaster]
FBgn0051974	0.381601	0.000397541	0.0120192	CG31974	uncharacterized protein Dmel_CG31974, isoform D [Drosophila melanogaster]
FBgn0039562	-0.24741	0.000412628	0.012439	Gp93	glycoprotein 93 [Drosophila melanogaster]
FBgn0260866	-0.303719	0.000415814	0.0124986	dnr1	defense repressor 1, isoform A [Drosophila melanogaster]
FBgn0032945	-0.533432	0.000417304	0.012507	CG8665	uncharacterized protein Dmel_CG8665 [Drosophila melanogaster]
FBgn0260499	0.51538	0.000431257	0.0128747	qvr	quiver, isoform B [Drosophila melanogaster]
FBgn0034262	0.603621	0.000432064	0.0128747	swi2	swi2 [Drosophila melanogaster]
FBgn0033327	-0.570045	0.000434545	0.0129115	PGRP-SC1b	peptidoglycan recognition protein SC1b, isoform B [Drosophila melanogaster]
FBgn0035146	-0.397128	0.000441374	0.0130768	CG13893	uncharacterized protein Dmel_CG13893 [Drosophila melanogaster]
FBgn0031697	1.25831	0.000458608	0.0135486	CG14024	uncharacterized protein Dmel_CG14024, isoform B [Drosophila melanogaster]
FBgn0040257	-0.712978	0.000462151	0.0136144	Ugt302E1	UDP-glycosyltransferase family 302 member E1 [Drosophila melanogaster]
FBgn0041582	-0.328081	0.000467973	0.0137467	tamo	tamo, isoform C [Drosophila melanogaster]
FBgn0035090	-0.331037	0.000469735	0.0137594	CG2736	uncharacterized protein Dmel_CG2736 [Drosophila melanogaster]
FBgn0003137	-0.271091	0.000474165	0.0138499	Ppn	papilin, isoform E [Drosophila melanogaster]
FBgn0042627	0.431136	0.000478732	0.0139439	FASN2	fatty acid synthase 2, isoform B [Drosophila melanogaster]
FBgn0022160	0.322314	0.000482664	0.0139855	Gpo1	glycerophosphate oxidase 1, isoform D [Drosophila melanogaster]
FBgn0262476	0.484789	0.000482866	0.0139855	CG43066	uncharacterized protein Dmel_CG43066, isoform C [Drosophila melanogaster]
FBgn0036066	-0.619903	0.000487161	0.0140705	CG14160	uncharacterized protein Dmel_CG14160 [Drosophila melanogaster]
FBgn0044826	-0.285277	0.000488947	0.0140828	Pak3	Pak3, isoform D [Drosophila melanogaster]
FBgn0030893	-0.387516	0.000495834	0.0142415	RhoGAP16F	Rho GTPase activating protein at 16F, isoform E [Drosophila melanogaster]
FBgn0260657	0.761777	0.000501931	0.0143766	CG42540	band 7 protein CG42540 isoform X1 [Drosophila mauritiana]
FBgn0034140	-0.321395	0.000511309	0.0146048	Lst	limostatin, isoform B [Drosophila melanogaster]
FBgn0026061	-0.320262	0.000513387	0.0146238	Mipp1	multiple inositol polyphosphate phosphatase 1, isoform C [Drosophila melanogaster]
FBgn0002938	0.444317	0.000523102	0.0148595	ninaC	neither inactivation nor afterpotential C, isoform B [Drosophila melanogaster]
FBgn0086370	-0.2547	0.00052516	0.0148771	sra	sarah, isoform B [Drosophila melanogaster]
FBgn0032116	-0.37758	0.000528548	0.0149322	Mco1	--
FBgn0051681	0.681533	0.000531813	0.0149835	CG31681	IP19041p, partial [Drosophila melanogaster]
FBgn0030828	-0.311618	0.000538665	0.0151353	CG5162	uncharacterized protein Dmel_CG5162, isoform B [Drosophila melanogaster]
FBgn0030052	-0.280313	0.000544417	0.0152555	CG12065	uncharacterized protein Dmel_CG12065, isoform A [Drosophila melanogaster]
FBgn0003863	-0.250548	0.000549264	0.0153232	alphaTry	alphaTrypsin [Drosophila melanogaster]
FBgn0037446	0.397116	0.000549799	0.0153232	Zif	Zinc-finger protein, isoform B [Drosophila melanogaster]
FBgn0019928	1.03554	0.00057038	0.0158531	Ser8	IP02555p, partial [Drosophila melanogaster]
FBgn0036821	-0.310303	0.000571877	0.0158531	CG3961	uncharacterized protein Dmel_CG3961, isoform C [Drosophila melanogaster]
FBgn0001224	-0.299923	0.00057363	0.0158592	Hsp23	heat shock protein 23, isoform B [Drosophila melanogaster]
FBgn0038143	0.407312	0.000591791	0.0163177	CG9813	uncharacterized protein Dmel_CG9813, isoform G [Drosophila melanogaster]
FBgn0035542	0.347965	0.000593863	0.0163312	DOR	diabetes and obesity regulated, isoform G [Drosophila melanogaster]
FBgn0041605	0.399696	0.000595725	0.016339	cpx	complexin, isoform AB [Drosophila melanogaster]
FBgn0027073	-0.326623	0.000609838	0.0166818	Ugt49B1	UDP-glycosyltransferase family 49 member B1 [Drosophila melanogaster]
FBgn0030716	0.639579	0.000627352	0.0171156	CG9170	uncharacterized protein Dmel_CG9170, isoform C [Drosophila melanogaster]
FBgn0032835	1.33731	0.00064392	0.0175214	CG16772	uncharacterized protein Dmel_CG16772, isoform B [Drosophila melanogaster]
FBgn0051296	-1.20848	0.000645814	0.0175268	CG31296	uncharacterized protein Dmel_CG31296, isoform B [Drosophila melanogaster]
FBgn0262952	0.451476	0.000664498	0.0179821	mt:ND4	--
FBgn0263235	-0.416513	0.000666199	0.0179821	Phae2	IP09733p, partial [Drosophila melanogaster]
FBgn0035498	-0.26567	0.000667809	0.0179821	Fit1	fermitin 1, isoform B [Drosophila melanogaster]
FBgn0039564	0.69449	0.000686017	0.0183891	Nep7	neprilysin 7 [Drosophila melanogaster]
FBgn0003250	0.40168	0.000686479	0.0183891	Rh4	rhodopsin 4 [Drosophila melanogaster]
FBgn0033592	-0.610167	0.000702094	0.0187588	CG13215	uncharacterized protein Dmel_CG13215 [Drosophila melanogaster]
FBgn0260767	-0.156822	0.000710979	0.0189472	CG42565	uncharacterized protein Dmel_CG42565, isoform B [Drosophila melanogaster]
FBgn0033659	0.436834	0.000737253	0.0195969	Damm	death associated molecule related to Mch2 caspase, isoform B [Drosophila melanogaster]
FBgn0038481	0.448252	0.000747528	0.0197947	CG17475	uncharacterized protein Dmel_CG17475, isoform B [Drosophila melanogaster]
FBgn0036918	0.39539	0.000748524	0.0197947	Pfdn6	prefoldin 6, isoform B [Drosophila melanogaster]
FBgn0026755	-1.24315	0.000752176	0.0197979	Ugt37B1	UDP-glycosyltransferase family 37 member B1 [Drosophila melanogaster]
FBgn0261788	0.13076	0.000752474	0.0197979	Ank2	ankyrin 2, isoform U [Drosophila melanogaster]
FBgn0020278	-0.323968	0.000762374	0.0200075	loco	locomotion defects, isoform D [Drosophila melanogaster]
FBgn0031417	0.515078	0.000769054	0.0201079	CG3597	uncharacterized protein Dmel_CG3597, isoform B [Drosophila melanogaster]
FBgn0030706	0.572472	0.000770089	0.0201079	Lrp4	LDL receptor related protein 4, isoform B [Drosophila melanogaster]
FBgn0030431	0.412281	0.000774605	0.0201749	CG4407	uncharacterized protein Dmel_CG4407, isoform A [Drosophila melanogaster]
FBgn0030331	-0.741038	0.000781612	0.0203062	CG15221	uncharacterized protein Dmel_CG15221 [Drosophila melanogaster]
FBgn0050021	-0.340395	0.000805127	0.0208647	metro	menage a trois, isoform A [Drosophila melanogaster]
FBgn0037612	-0.416629	0.000808269	0.0208937	CG8112	uncharacterized protein Dmel_CG8112, isoform B [Drosophila melanogaster]
FBgn0261703	-0.297517	0.000822793	0.0212162	gce	germ cell-expressed bHLH-PAS, isoform D [Drosophila melanogaster]
FBgn0031805	0.500027	0.00084073	0.0216248	Nepl4	--
FBgn0085424	0.413843	0.000847411	0.0217425	nub	nubbin, isoform B [Drosophila melanogaster]
FBgn0034808	-0.306389	0.000861889	0.0220592	CG9896	uncharacterized protein Dmel_CG9896 [Drosophila melanogaster]
FBgn0262475	-0.273342	0.000874103	0.0223166	bru2	bruno 2, isoform E [Drosophila melanogaster]
FBgn0004427	-0.315513	0.000878245	0.0223671	LysD	lysozyme D [Drosophila melanogaster]
FBgn0284435	1.20318	0.000896691	0.0227292	tyn	trynity, isoform A [Drosophila melanogaster]
FBgn0038349	-0.256955	0.000896857	0.0227292	AOX3	aldehyde oxidase 3, isoform B [Drosophila melanogaster]
FBgn0039321	0.352206	0.000912243	0.0230626	CG10550	uncharacterized protein Dmel_CG10550, isoform D [Drosophila melanogaster]
FBgn0262593	0.679085	0.000941207	0.0237368	Shab	shaker cognate b, isoform M [Drosophila melanogaster]
FBgn0033302	-0.378085	0.000961535	0.0241904	Cyp6a14	--
FBgn0034406	-0.281438	0.000969865	0.0243408	Jheh3	juvenile hormone epoxide hydrolase 3 [Drosophila melanogaster]
FBgn0032048	0.512406	0.000977213	0.0244658	Dh31	--
FBgn0040212	-0.311361	0.00100126	0.0250074	Dhap-at	dihydroxyacetone phosphate acyltransferase, isoform B [Drosophila melanogaster]
FBgn0013675	0.43607	0.00102429	0.025499	mt:CoII	--
FBgn0050008	0.367437	0.00102588	0.025499	CG30008	uncharacterized protein Dmel_CG30008 [Drosophila melanogaster]
FBgn0260748	-0.356726	0.00104048	0.0257999	CG5004	uncharacterized protein Dmel_CG5004, isoform A [Drosophila melanogaster]
FBgn0029866	-0.338695	0.00104716	0.0259035	CG3842	uncharacterized protein Dmel_CG3842, isoform C [Drosophila melanogaster]
FBgn0053147	0.845554	0.00105009	0.0259138	Hs3st-A	heparan sulfate 3-O sulfotransferase-A, isoform B [Drosophila melanogaster]
FBgn0003963	-0.374702	0.0010527	0.0259165	ush	u-shaped, isoform B [Drosophila melanogaster]
FBgn0028940	0.419192	0.00105636	0.0259447	Cyp28a5	Cyp28a5 [Drosophila melanogaster]
FBgn0002868	-0.405696	0.00106279	0.0260409	MtnA	metallothionein A, isoform B [Drosophila melanogaster]
FBgn0000121	0.435163	0.0010708	0.026175	Arr2	arrestin 2 [Drosophila melanogaster]
FBgn0284223	1.18688	0.0010734	0.0261767	CG46307	uncharacterized protein Dmel_CG46307 [Drosophila melanogaster]
FBgn0003748	-0.239675	0.00107605	0.0261798	Treh	trehalase, isoform C [Drosophila melanogaster]
FBgn0053281	0.513172	0.00109099	0.0264808	CG33281	uncharacterized protein Dmel_CG33281 [Drosophila melanogaster]
FBgn0002917	0.733485	0.00115115	0.0278148	na	narrow abdomen, isoform F [Drosophila melanogaster]
FBgn0034364	-0.5231	0.00115133	0.0278148	CG5493	uncharacterized protein Dmel_CG5493, isoform B [Drosophila melanogaster]
FBgn0010383	-0.444721	0.00116034	0.0279672	Cyp18a1	cytochrome P450-18a1, isoform B [Drosophila melanogaster]
FBgn0031929	-0.34957	0.00117412	0.0282335	CG18585	--
FBgn0037973	-0.442507	0.00117755	0.0282503	CG18547	uncharacterized protein Dmel_CG18547 [Drosophila melanogaster]
FBgn0034387	-0.296505	0.00118379	0.0283341	Cyp12b2	Cyp12b2 [Drosophila melanogaster]
FBgn0000659	-0.341732	0.00118737	0.0283542	fkh	fork head, isoform E [Drosophila melanogaster]
FBgn0262160	-0.238719	0.00119918	0.0285702	CG9932	uncharacterized protein Dmel_CG9932, isoform A [Drosophila melanogaster]
FBgn0035089	0.553266	0.00121109	0.0287409	Phk-3	pherokine 3, isoform B [Drosophila melanogaster]
FBgn0034317	0.454281	0.0012119	0.0287409	CG14499	--
FBgn0034986	0.383705	0.00125205	0.0296253	mRpS17	mitochondrial ribosomal protein S17 [Drosophila melanogaster]
FBgn0053988	0.888355	0.00125742	0.0296844	Mid1	Mid1, isoform A [Drosophila melanogaster]
FBgn0261575	-0.977445	0.00126673	0.0298359	tobi	target of brain insulin [Drosophila melanogaster]
FBgn0039678	0.543933	0.00130559	0.0306813	Obp99a	Odorant-binding protein 99a, isoform B [Drosophila melanogaster]
FBgn0037167	0.901689	0.00131586	0.0308526	CG11425	uncharacterized protein Dmel_CG11425 [Drosophila melanogaster]
FBgn0031937	-0.433746	0.00132417	0.0309772	CG13795	--
FBgn0028360	-0.266916	0.00133364	0.0311284	Cdc7	Cdc7 kinase, isoform A [Drosophila melanogaster]
FBgn0003046	1.22456	0.00133851	0.0311717	Pcp	LP18565p [Drosophila melanogaster]
FBgn0004429	-0.298608	0.00134701	0.031299	LysP	IP02746p, partial [Drosophila melanogaster]
FBgn0040606	-0.475796	0.00135083	0.0313174	CG6503	uncharacterized protein Dmel_CG6503, isoform B [Drosophila melanogaster]
FBgn0284231	-0.343378	0.00136628	0.0316049	CG46315	***** No hits found *****
FBgn0037519	1.18796	0.00137889	0.0318253	CG3014	uncharacterized protein Dmel_CG3014, isoform C [Drosophila melanogaster]
FBgn0001226	-0.188814	0.00138299	0.0318487	Hsp27	heat shock protein 27, isoform B [Drosophila melanogaster]
FBgn0023541	-0.592122	0.00139074	0.0319561	Cyp4d14	Cyp4d14, isoform B [Drosophila melanogaster]
FBgn0033067	0.765315	0.00139662	0.03202	CG11211	uncharacterized protein Dmel_CG11211 [Drosophila melanogaster]
FBgn0038717	0.457438	0.00143485	0.0328238	CG17751	uncharacterized protein Dmel_CG17751 [Drosophila melanogaster]
FBgn0033296	-1.03246	0.00144066	0.0328801	Mal-A7	maltase A7, isoform B [Drosophila melanogaster]
FBgn0035933	0.374535	0.00144367	0.0328801	CG13309	MIP11882p, partial [Drosophila melanogaster]
FBgn0039682	-0.341915	0.00145171	0.0329906	Obp99c	Odorant-binding protein 99c, isoform A [Drosophila melanogaster]
FBgn0003249	0.416749	0.00147058	0.0333461	Rh3	rhodopsin 3 [Drosophila melanogaster]
FBgn0283480	-0.407982	0.00148072	0.0335025	Alp2	alkaline phosphatase 2 [Drosophila melanogaster]
FBgn0027932	-0.257857	0.00149089	0.0336052	Akap200	A kinase anchor protein 200, isoform G [Drosophila melanogaster]
FBgn0027608	0.40459	0.00149176	0.0336052	CG2082	uncharacterized protein Dmel_CG2082, isoform G [Drosophila melanogaster]
FBgn0001089	-0.514644	0.00150094	0.0337386	Gal	beta galactosidase, isoform A [Drosophila melanogaster]
FBgn0030928	-0.35263	0.00150734	0.0338089	CG15044	uncharacterized protein Dmel_CG15044 [Drosophila melanogaster]
FBgn0035246	0.539992	0.00151406	0.033886	CG13928	uncharacterized protein Dmel_CG13928 [Drosophila melanogaster]
FBgn0027335	-0.220121	0.00153349	0.0342468	Rip11	Rab11 interacting protein, isoform A [Drosophila melanogaster]
FBgn0039324	-0.434351	0.00156137	0.0347943	CG10553	uncharacterized protein Dmel_CG10553 [Drosophila melanogaster]
FBgn0035929	1.10642	0.00156652	0.034834	CG13311	uncharacterized protein Dmel_CG13311 [Drosophila melanogaster]
FBgn0035290	-0.57453	0.00158371	0.0351407	dsb	debris buster, isoform D [Drosophila melanogaster]
FBgn0003356	0.313959	0.00159005	0.0352058	Jon99Cii	LP12217p, partial [Drosophila melanogaster]
FBgn0035092	0.385702	0.00159415	0.0352211	Nplp1	Neuropeptide-like precursor 1, isoform C [Drosophila melanogaster]
FBgn0036734	0.16144	0.00160665	0.0353825	CG7564	uncharacterized protein Dmel_CG7564, isoform B [Drosophila melanogaster]
FBgn0032717	-0.30477	0.00160829	0.0353825	CG10600	uncharacterized protein Dmel_CG10600, isoform B [Drosophila melanogaster]
FBgn0053983	-1.29862	0.001618	0.0355203	obst-H	obstructor-H [Drosophila melanogaster]
FBgn0036549	-0.394906	0.00162636	0.0356283	CG10516	uncharacterized protein Dmel_CG10516 [Drosophila melanogaster]
FBgn0016070	-0.303851	0.00167261	0.036564	smg	smaug, isoform D [Drosophila melanogaster]
FBgn0051092	-0.29662	0.00167774	0.0365817	LpR2	lipophorin receptor 2, isoform E [Drosophila melanogaster]
FBgn0032946	0.253842	0.00168231	0.0365817	nrv3	nervana 3, isoform E [Drosophila melanogaster]
FBgn0005659	-0.47824	0.00168403	0.0365817	Ets98B	Ets at 98B, isoform A [Drosophila melanogaster]
FBgn0003731	-0.261405	0.00169614	0.0367674	Egfr	epidermal growth factor receptor, isoform B [Drosophila melanogaster]
FBgn0005664	-0.693429	0.00170383	0.036857	Crys	crystallin, isoform B [Drosophila melanogaster]
FBgn0262731	0.433328	0.00170808	0.0368717	CG33941	uncharacterized protein Dmel_CG33941 [Drosophila melanogaster]
FBgn0259246	0.595769	0.00172768	0.037217	brp	bruchpilot, isoform J [Drosophila melanogaster]
FBgn0033214	-0.431122	0.0017865	0.0384041	CG1941	uncharacterized protein Dmel_CG1941, isoform B [Drosophila melanogaster]
FBgn0250908	1.08539	0.0017929	0.0384618	beat-VII	beaten path VII [Drosophila melanogaster]
MSTRG.8528	-0.301092	0.00180635	0.03867	--	--
FBgn0052843	0.408509	0.0018166	0.0388092	Dh31-R	diuretic hormone 31 receptor, isoform A [Drosophila melanogaster]
FBgn0264494	-0.252443	0.00182547	0.0389182	CG17646	uncharacterized protein Dmel_CG17646, isoform A [Drosophila melanogaster]
FBgn0038975	0.458759	0.00184862	0.0393307	Nrx-1	neurexin 1, isoform F [Drosophila melanogaster]
FBgn0038693	0.508697	0.00186952	0.0396926	unc79	uncoordinated 79, isoform C [Drosophila melanogaster]
FBgn0000492	0.78136	0.0018733	0.0396926	Dr	drop [Drosophila melanogaster]
FBgn0003231	-0.201806	0.00187732	0.0396962	ref(2)P	refractory to sigma P, isoform B [Drosophila melanogaster]
FBgn0036196	0.429751	0.00188994	0.0398816	CG11658	F-box only protein 32 [Drosophila sechellia]
FBgn0010053	-0.286374	0.00191672	0.0403644	Jheh1	juvenile hormone epoxide hydrolase 1 [Drosophila melanogaster]
FBgn0014019	0.617639	0.00197261	0.0414568	Rh5	rhodopsin 5, isoform B [Drosophila melanogaster]
FBgn0001227	-0.588412	0.00198974	0.041732	Hsp67Ba	heat shock gene 67Ba [Drosophila melanogaster]
FBgn0033000	0.391738	0.00199717	0.0418031	CG14464	LD29015p [Drosophila melanogaster]
FBgn0261260	-0.303257	0.00200519	0.0418863	mgl	megalin, isoform A [Drosophila melanogaster]
FBgn0014417	-0.361175	0.00201834	0.0420591	CG13397	uncharacterized protein Dmel_CG13397, isoform B [Drosophila melanogaster]
FBgn0030438	0.42229	0.00202373	0.0420591	CG15721	uncharacterized protein Dmel_CG15721 [Drosophila melanogaster]
FBgn0031756	0.581865	0.00202567	0.0420591	CG13992	--
FBgn0015576	-0.414598	0.00208401	0.0431837	alpha-Est8	alpha-Esterase-8 [Drosophila melanogaster]
FBgn0028425	0.314299	0.00210459	0.0435228	JhI-21	juvenile hormone Inducible-21, isoform C [Drosophila melanogaster]
FBgn0051265	0.465125	0.00212915	0.0439429	CG31265	RE04676p, partial [Drosophila melanogaster]
FBgn0263773	-0.292129	0.00220036	0.0452932	fok	fledgling of Klp38B, isoform C [Drosophila melanogaster]
FBgn0004390	-0.299931	0.00220333	0.0452932	RasGAP1	Ras GTPase activating protein 1, isoform A [Drosophila melanogaster]
FBgn0011701	0.784034	0.0022094	0.0453278	repo	reversed polarity [Drosophila melanogaster]
FBgn0053808	0.339235	0.00223488	0.0457598	His2A:CG33808	histone H2A [Drosophila melanogaster]
FBgn0036768	0.880213	0.00224345	0.0458445	CG7402	uncharacterized protein Dmel_CG7402 [Drosophila melanogaster]
FBgn0061356	0.434001	0.00227219	0.0463402	CG18003	uncharacterized protein Dmel_CG18003 [Drosophila melanogaster]
FBgn0039754	0.70044	0.00227941	0.0463958	CG9747	uncharacterized protein Dmel_CG9747, isoform B [Drosophila melanogaster]
FBgn0063492	-0.483589	0.0022937	0.046595	GstE8	FI21406p1, partial [Drosophila melanogaster]
FBgn0033978	0.377058	0.00234063	0.0474551	Cyp6a23	Cyp6a23 [Drosophila melanogaster]
FBgn0263993	-0.223803	0.00235416	0.0475953	CG43736	uncharacterized protein Dmel_CG43736, isoform I [Drosophila melanogaster]
FBgn0038652	0.279041	0.00235694	0.0475953	CG7720	uncharacterized protein Dmel_CG7720, isoform C [Drosophila melanogaster]
FBgn0029814	0.51384	0.00236135	0.0475953	CG15765	uncharacterized protein Dmel_CG15765, isoform B [Drosophila melanogaster]
FBgn0039481	-0.920006	0.00237228	0.0477226	Cpr97Eb	cuticular protein 97Eb [Drosophila melanogaster]
FBgn0004914	-0.213182	0.00238843	0.0478916	Hnf4	hepatocyte nuclear factor 4, isoform B [Drosophila melanogaster]
FBgn0002565	4.3505	0.00238995	0.0478916	Lsp2	larval serum protein 2, isoform B [Drosophila melanogaster]
FBgn0028473	-0.216979	0.00239877	0.0479755	Non1	novel nucleolar protein 1, isoform B [Drosophila melanogaster]
FBgn0033108	0.724929	0.00242733	0.0484348	CG15236	uncharacterized protein Dmel_CG15236, isoform A [Drosophila melanogaster]
FBgn0023215	-0.269701	0.00243111	0.0484348	Mnt	Mnt, isoform D [Drosophila melanogaster]
FBgn0020653	-0.186456	0.00243839	0.0484865	Trxr-1	thioredoxin reductase-1, isoform B [Drosophila melanogaster]
FBgn0037012	-0.288972	0.00244389	0.0485025	Rcd2	reduction in Cnn dots 2 [Drosophila melanogaster]
FBgn0039760	-0.214346	0.00246127	0.0487539	CG9682	uncharacterized protein Dmel_CG9682, isoform B [Drosophila melanogaster]
FBgn0029766	-0.223831	0.00250533	0.0495317	CG15784	uncharacterized protein Dmel_CG15784, isoform B [Drosophila melanogaster]
FBgn0031973	-0.393109	0.00251183	0.0495654	Spn28Dc	--
FBgn0016977	-0.221661	0.00252288	0.0496888	spen	split ends, isoform A [Drosophila melanogaster]
FBgn0261560	0.249927	0.00255553	0.050236	Thor	thor, isoform B [Drosophila melanogaster]
FBgn0032193	0.489559	0.00259907	0.050995	CG5727	--
FBgn0045038	0.46984	0.00262075	0.0513229	Proc	proctolin, isoform B [Drosophila melanogaster]
FBgn0038702	0.593967	0.00270046	0.052784	CG3739	uncharacterized protein Dmel_CG3739 [Drosophila melanogaster]
FBgn0023524	1.01034	0.00278676	0.0543681	CG3078	uncharacterized protein Dmel_CG3078, isoform B [Drosophila melanogaster]
FBgn0051300	-0.414519	0.00283109	0.055129	CG31300	uncharacterized protein Dmel_CG31300 [Drosophila melanogaster]
FBgn0033203	-1	0.00286019	0.055591	CG2070	uncharacterized protein Dmel_CG2070, isoform B [Drosophila melanogaster]
FBgn0260959	-0.355447	0.00287487	0.0557715	MCPH1	microcephalin, isoform D [Drosophila melanogaster]
FBgn0004583	-0.301922	0.00288243	0.0558133	ex	expanded, isoform B [Drosophila melanogaster]
FBgn0034200	-0.254668	0.00290506	0.0561463	Gbp2	Growth-blocking peptide 2, isoform B [Drosophila melanogaster]
FBgn0034331	0.671849	0.0029112	0.0561601	CG15067	RH32613p, partial [Drosophila melanogaster]
FBgn0260746	-0.411573	0.00292149	0.0562536	Ect3	Ectoderm-expressed 3 [Drosophila melanogaster]
FBgn0030317	0.462758	0.003011	0.0578695	CG1561	uncharacterized protein Dmel_CG1561 [Drosophila melanogaster]
FBgn0032253	-0.329609	0.00302481	0.058027	LManI	--
FBgn0037549	-0.24925	0.00305641	0.0585246	CG7878	uncharacterized protein Dmel_CG7878 [Drosophila melanogaster]
FBgn0265512	0.316622	0.00306829	0.0586435	mlt	mulet, isoform C [Drosophila melanogaster]
FBgn0040319	-0.202168	0.00307618	0.0586857	Gclc	Glutamate-cysteine ligase catalytic subunit, isoform C [Drosophila melanogaster]
FBgn0002932	-0.324236	0.00309033	0.0588472	neur	neuralized, isoform A [Drosophila melanogaster]
FBgn0040531	0.930786	0.00314607	0.0597984	CG11741	uncharacterized protein Dmel_CG11741, isoform A [Drosophila melanogaster]
FBgn0039591	0.971986	0.00315676	0.0598916	CG9988	uncharacterized protein Dmel_CG9988 [Drosophila melanogaster]
FBgn0037534	0.358963	0.00318041	0.0602298	ELOVL	uncharacterized protein Dsimw501_GD19443, isoform A [Drosophila simulans]
FBgn0000615	0.399736	0.00320944	0.0606371	exu	exuperantia, isoform D [Drosophila melanogaster]
FBgn0031562	0.470415	0.0032232	0.0606371	CG3604	uncharacterized protein Dmel_CG3604, isoform B [Drosophila melanogaster]
FBgn0039520	0.755615	0.00322668	0.0606371	Gr98a	gustatory receptor 98a [Drosophila melanogaster]
FBgn0054026	-0.597827	0.0032298	0.0606371	CG34026	uncharacterized protein Dmel_CG34026, isoform A [Drosophila melanogaster]
FBgn0035904	-0.258828	0.00323124	0.0606371	GstO3	glutathione S transferase O3 [Drosophila melanogaster]
FBgn0035695	-0.323655	0.00326576	0.0611737	CG10226	uncharacterized protein Dmel_CG10226, isoform A [Drosophila melanogaster]
FBgn0028704	0.481182	0.00327474	0.0611942	Nckx30C	Nckx30C, isoform D [Drosophila melanogaster]
FBgn0002939	-0.820876	0.00327868	0.0611942	ninaD	neither inactivation nor afterpotential D, isoform A [Drosophila melanogaster]
FBgn0033246	-0.266798	0.00330713	0.061614	ACC	Acetyl-CoA carboxylase, isoform A [Drosophila melanogaster]
FBgn0013772	-0.51134	0.00331763	0.0616984	Cyp6a8	FI17852p1, partial [Drosophila melanogaster]
FBgn0033065	-0.500387	0.00335367	0.0622566	Cyp6w1	Cyp6w1, isoform B [Drosophila melanogaster]
FBgn0001296	0.318813	0.00339656	0.0629399	kar	karmoisin, isoform B [Drosophila melanogaster]
FBgn0052053	-0.589708	0.00344968	0.0636997	CG32053	uncharacterized protein Dmel_CG32053 [Drosophila melanogaster]
FBgn0032896	0.536516	0.00344989	0.0636997	CG14400	uncharacterized protein Dmel_CG14400 [Drosophila melanogaster]
FBgn0035968	-0.347007	0.00347215	0.0639964	Slc45-1	solute carrier family 45 member 1, isoform B [Drosophila melanogaster]
FBgn0037140	-0.4533	0.00348334	0.0640885	SLC22A	SLC22A family member [Drosophila melanogaster]
FBgn0034160	-0.280855	0.00351419	0.0643971	CG5550	uncharacterized protein Dmel_CG5550, isoform B [Drosophila melanogaster]
FBgn0061361	0.462078	0.0035188	0.0643971	CG33786	uncharacterized protein Dmel_CG33786 [Drosophila melanogaster]
FBgn0061362	0.462078	0.0035188	0.0643971	CG33785	MIP03842p1, partial [Drosophila melanogaster]
FBgn0267002	0.32315	0.00353736	0.0646224	unc-104	uncoordinated-104, isoform D [Drosophila melanogaster]
FBgn0029799	1.03619	0.00357043	0.0651115	CG15772	uncharacterized protein Dmel_CG15772, isoform B [Drosophila melanogaster]
FBgn0042101	-0.371205	0.00357838	0.0651417	CG18744	uncharacterized protein Dmel_CG18744 [Drosophila melanogaster]
FBgn0033391	-0.200534	0.00358588	0.0651634	CG8026	uncharacterized protein Dmel_CG8026, isoform D [Drosophila melanogaster]
FBgn0032002	0.407442	0.00362974	0.0658448	CG8353	--
FBgn0085414	0.785261	0.00365544	0.0661949	dpr12	defective proboscis extension response 12, isoform C [Drosophila melanogaster]
FBgn0013303	0.377595	0.00368104	0.0663725	Nca	neurocalcin [Drosophila melanogaster]
FBgn0261862	-0.211944	0.0036835	0.0663725	whd	withered, isoform C [Drosophila melanogaster]
FBgn0023441	-0.239903	0.00368451	0.0663725	fus	fusilli, isoform D [Drosophila melanogaster]
FBgn0086778	0.821543	0.00372993	0.0670414	nAChRalpha7	nicotinic acetylcholine receptor alpha7, isoform E [Drosophila melanogaster]
FBgn0035101	-0.206133	0.00373461	0.0670414	p130CAS	p130CAS, isoform D [Drosophila melanogaster]
FBgn0023095	-0.245261	0.00374575	0.0671249	caps	capricious, isoform A [Drosophila melanogaster]
FBgn0039703	0.665374	0.00381716	0.0682862	CG7829	uncharacterized protein Dmel_CG7829 [Drosophila melanogaster]
FBgn0029881	-0.321568	0.00383951	0.0685675	pigs	pickled eggs, isoform B [Drosophila melanogaster]
FBgn0040364	0.331238	0.00384988	0.0686342	CG11378	uncharacterized protein Dmel_CG11378, isoform B [Drosophila melanogaster]
FBgn0263199	-0.206379	0.00386402	0.0686663	Galk	galactokinase, isoform D [Drosophila melanogaster]
FBgn0053966	-0.515709	0.00386497	0.0686663	CG33966	RE21492p, partial [Drosophila melanogaster]
FBgn0036882	0.727474	0.00390918	0.0693327	CG9279	uncharacterized protein Dmel_CG9279, isoform C [Drosophila melanogaster]
FBgn0029137	0.981223	0.00392827	0.0695496	Patsas	patsas, isoform C [Drosophila melanogaster]
FBgn0032213	-0.250502	0.00393487	0.0695496	CG5390	--
FBgn0284253	0.317435	0.00396896	0.0700324	LeuRS	Leucyl-tRNA synthetase, isoform B [Drosophila melanogaster]
FBgn0262007	-0.289035	0.00398737	0.0702374	CG42825	uncharacterized protein Dmel_CG42825 [Drosophila melanogaster]
FBgn0038981	-0.220131	0.00403748	0.0709992	CG5346	uncharacterized protein Dmel_CG5346 [Drosophila melanogaster]
FBgn0051973	-0.651663	0.0040469	0.071044	Cda5	chitin deacetylase-like 5, isoform B [Drosophila melanogaster]
FBgn0263234	-0.416889	0.00405477	0.0710616	Phae1	phaedra 1, isoform B [Drosophila melanogaster]
FBgn0040020	0.366454	0.00412369	0.0719225	MED21	mediator complex subunit 21, isoform A [Drosophila melanogaster]
FBgn0037315	-0.23021	0.00412415	0.0719225	Cerk	ceramide kinase, isoform B [Drosophila melanogaster]
FBgn0052023	0.53704	0.00412476	0.0719225	CG32023	uncharacterized protein Dmel_CG32023 [Drosophila melanogaster]
FBgn0010435	-0.216883	0.00413398	0.071962	emp	epithelial membrane protein, isoform B [Drosophila melanogaster]
FBgn0267435	0.360359	0.00417397	0.0725358	chp	chaoptin, isoform A [Drosophila melanogaster]
FBgn0036433	-0.286012	0.0042007	0.0728778	CG9628	uncharacterized protein Dmel_CG9628, isoform C [Drosophila melanogaster]
FBgn0052512	-0.297459	0.00421412	0.0729883	CG32512	uncharacterized protein Dmel_CG32512, isoform D [Drosophila melanogaster]
FBgn0267252	0.322726	0.00426712	0.0737827	Ggamma30A	LOW QUALITY PROTEIN: uncharacterized protein LOC6505367 [Drosophila ananassae]
FBgn0026418	-0.245734	0.00428172	0.0739114	Hsc70Cb	Hsc70Cb, isoform G [Drosophila melanogaster]
FBgn0004425	-0.361042	0.00430344	0.0741627	LysB	lysozyme B, isoform B [Drosophila melanogaster]
FBgn0035795	-2.8606	0.00438453	0.075335	CG16998	uncharacterized protein Dmel_CG16998 [Drosophila melanogaster]
FBgn0031936	-0.419327	0.00438604	0.075335	CG13794	--
FBgn0036005	-0.278313	0.0044068	0.075566	pall	pallbearer [Drosophila melanogaster]
FBgn0035718	0.327162	0.00445699	0.0763001	CG14820	uncharacterized protein Dmel_CG14820 [Drosophila melanogaster]
FBgn0085244	-0.569181	0.00446601	0.0763282	CG34215	LP20105p, partial [Drosophila melanogaster]
FBgn0034758	-0.183697	0.00447798	0.0764064	CG13510	uncharacterized protein Dmel_CG13510, isoform B [Drosophila melanogaster]
FBgn0260000	-0.457084	0.0044864	0.0764239	CG17570	uncharacterized protein Dmel_CG17570 [Drosophila melanogaster]
FBgn0260799	0.3373	0.0044969	0.076477	p120ctn	adherens junction protein p120 [Drosophila melanogaster]
FBgn0266450	-0.238587	0.00450886	0.0765544	Kr-h1	kruppel homolog 1, isoform B [Drosophila melanogaster]
FBgn0062978	0.354556	0.00458881	0.0777841	CG31808	uncharacterized protein Dmel_CG31808 [Drosophila melanogaster]
FBgn0261954	-0.292074	0.00468671	0.0793135	east	enhanced adult sensory threshold, isoform E [Drosophila melanogaster]
FBgn0010434	-0.198012	0.00470451	0.0794847	cora	coracle, isoform A [Drosophila melanogaster]
FBgn0285958	-0.547488	0.00471279	0.0794856	Fuca	alpha-L-fucosidase, isoform C [Drosophila melanogaster]
FBgn0259212	-0.275811	0.00471994	0.0794856	cno	canoe, isoform J [Drosophila melanogaster]
FBgn0032135	-0.280943	0.00472848	0.0795	GlcAT-S	--
FBgn0036710	-0.393048	0.00473818	0.0795337	CG6479	uncharacterized protein Dmel_CG6479, isoform A [Drosophila melanogaster]
FBgn0002570	-0.660335	0.00474808	0.0795708	Mal-A1	RE72980p, partial [Drosophila melanogaster]
FBgn0030251	-0.231411	0.00478083	0.07999	CG2145	GH21533p, partial [Drosophila melanogaster]
FBgn0037936	-0.595248	0.00486945	0.0813411	CG6908	uncharacterized protein Dmel_CG6908, isoform A [Drosophila melanogaster]
FBgn0262477	1.01065	0.0048847	0.0814642	FoxP	forkhead box P, isoform C [Drosophila melanogaster]
FBgn0035187	1.05631	0.00489882	0.0815681	Trh	tryptophan hydroxylase [Drosophila melanogaster]
FBgn0015570	-0.286088	0.0049659	0.082552	alpha-Est2	alpha-Esterase-2, isoform B [Drosophila melanogaster]
FBgn0026077	-0.407175	0.00498534	0.0827422	Gasp	PREDICTED: uncharacterized protein LOC108091798 [Drosophila ficusphila]
FBgn0028534	-0.32919	0.00499927	0.0828405	CG7916	uncharacterized protein Dmel_CG7916 [Drosophila melanogaster]
FBgn0260462	-0.184373	0.00501116	0.0829046	CG12163	uncharacterized protein Dmel_CG12163, isoform A [Drosophila melanogaster]
FBgn0039232	-0.302686	0.00506351	0.0835223	sosie	sosie, isoform A [Drosophila melanogaster]
FBgn0039309	-0.452713	0.00506465	0.0835223	CG11891	--
FBgn0034194	-0.304049	0.00514963	0.0847886	CG15611	uncharacterized protein Dmel_CG15611, isoform A [Drosophila melanogaster]
FBgn0004784	0.441324	0.00515833	0.0847968	inaC	inactivation no afterpotential C [Drosophila melanogaster]
FBgn0004797	-0.315084	0.00527399	0.0863906	mdy	midway, isoform A [Drosophila melanogaster]
FBgn0029769	-0.317093	0.00529879	0.0863906	frma	fra mauro, isoform F [Drosophila melanogaster]
FBgn0030160	-0.277271	0.00529895	0.0863906	CG9691	uncharacterized protein Dmel_CG9691, isoform A [Drosophila melanogaster]
FBgn0037517	-0.271644	0.00530157	0.0863906	CG10086	uncharacterized protein Dmel_CG10086 [Drosophila melanogaster]
FBgn0031299	0.489198	0.00530264	0.0863906	CG4629	uncharacterized protein Dmel_CG4629, isoform F [Drosophila melanogaster]
FBgn0032816	0.451845	0.00530542	0.0863906	Nf-YB	nuclear factor Y-box B, isoform B [Drosophila melanogaster]
FBgn0037239	-0.20228	0.00536342	0.0871977	Sfxn1-3	sideroflexin 1/3, isoform A [Drosophila melanogaster]
FBgn0000360	1.84374	0.0053911	0.0875101	Cp38	chorion protein 38, isoform B [Drosophila melanogaster]
FBgn0028583	0.265291	0.0054319	0.0880342	lcs	***** No hits found *****
FBgn0027594	-0.18615	0.00546576	0.0882056	drpr	draper, isoform E [Drosophila melanogaster]
FBgn0010309	0.461954	0.00546677	0.0882056	pigeon	pigeon, isoform A [Drosophila melanogaster]
FBgn0003983	1.78569	0.00546806	0.0882056	Vm34Ca	IP02755p, partial [Drosophila melanogaster]
FBgn0038638	-0.30306	0.00557498	0.0897902	CG7702	uncharacterized protein Dmel_CG7702, isoform A [Drosophila melanogaster]
FBgn0014076	2.12693	0.00560408	0.0901184	Vm32E	vitelline membrane 32E, isoform B [Drosophila melanogaster]
FBgn0031516	-0.28984	0.00561413	0.0901399	CG9663	uncharacterized protein Dmel_CG9663 [Drosophila melanogaster]
FBgn0039536	0.475199	0.00576142	0.0923614	unc80	uncoordinated 80, isoform F [Drosophila melanogaster]
FBgn0020545	0.278245	0.00578877	0.0926562	kraken	kraken, isoform B [Drosophila melanogaster]
FBgn0011205	0.254172	0.0058795	0.0939629	fbl	fumble, isoform E [Drosophila melanogaster]
FBgn0038257	-0.314704	0.00590909	0.0942902	smp-30	senescence marker protein-30, isoform C [Drosophila melanogaster]
FBgn0034405	-0.201992	0.0060022	0.0956282	Jheh2	juvenile hormone epoxide hydrolase 2, isoform A [Drosophila melanogaster]
FBgn0003053	-0.27747	0.00601783	0.0957298	peb	pebbled, isoform B [Drosophila melanogaster]
FBgn0262738	0.262116	0.00603912	0.0959209	norpA	no receptor potential A, isoform E [Drosophila melanogaster]
FBgn0030310	0.475874	0.00611286	0.0969432	PGRP-SA	peptidoglycan recognition protein SA, isoform B [Drosophila melanogaster]
FBgn0039054	0.464824	0.00615406	0.0974471	Cow	carrier of wingless, isoform E [Drosophila melanogaster]
FBgn0266411	-0.196892	0.00617559	0.09759	sima	similar, isoform D [Drosophila melanogaster]
FBgn0037327	-0.287861	0.00618196	0.09759	PEK	pancreatic eIF-2alpha kinase, isoform A [Drosophila melanogaster]
FBgn0028886	0.35266	0.00633966	0.099927	CG15279	uncharacterized protein Dmel_CG15279, isoform A [Drosophila melanogaster]
FBgn0051267	0.385925	0.00637005	0.100253	CG31267	uncharacterized protein Dmel_CG31267 [Drosophila melanogaster]
FBgn0051373	0.327372	0.00640958	0.100722	CG31373	IP07194p, partial [Drosophila melanogaster]
FBgn0032382	-0.202535	0.00650225	0.102023	Mal-B2	--
FBgn0262562	0.340834	0.0065182	0.102118	CG43102	uncharacterized protein Dmel_CG43102, isoform C [Drosophila melanogaster]
FBgn0002571	-0.416195	0.0066046	0.103316	Mal-A3	maltase A3 [Drosophila melanogaster]
FBgn0000346	0.350894	0.00664275	0.103755	comt	comatose, isoform B [Drosophila melanogaster]
FBgn0034602	-0.30872	0.00665943	0.103859	Lapsyn	Leucine-rich repeat activity-regulated protein at synapses [Drosophila melanogaster]
FBgn0265192	0.300518	0.00675092	0.105003	Snp	snipper, isoform D [Drosophila melanogaster]
FBgn0037715	0.27211	0.0067531	0.105003	CG9399	uncharacterized protein Dmel_CG9399, isoform D [Drosophila melanogaster]
FBgn0267398	0.276897	0.00680504	0.105652	Yeti	yeti, isoform A [Drosophila melanogaster]
FBgn0037240	-0.223497	0.00683615	0.105893	Cont	contactin [Drosophila melanogaster]
FBgn0032350	-0.164582	0.00684108	0.105893	CG6287	--
FBgn0031523	0.413322	0.00689412	0.106478	CG15408	uncharacterized protein Dmel_CG15408 [Drosophila melanogaster]
FBgn0037818	0.411845	0.00689945	0.106478	CG6465	uncharacterized protein Dmel_CG6465 [Drosophila melanogaster]
FBgn0025631	-0.198684	0.00691859	0.106614	moody	moody, isoform B [Drosophila melanogaster]
FBgn0032788	1.76494	0.00694488	0.10686	CG13084	uncharacterized protein Dmel_CG13084 [Drosophila melanogaster]
FBgn0032773	0.267225	0.00696752	0.107049	fon	fondue, isoform C [Drosophila melanogaster]
FBgn0038747	-0.217099	0.00698807	0.107206	RhoGAP92B	Rho GTPase activating protein at 92B, isoform E [Drosophila melanogaster]
FBgn0261108	-0.214671	0.00700691	0.107335	Atg13	Autophagy-related 13 [Drosophila melanogaster]
FBgn0038731	-0.475253	0.00713045	0.109066	CG11659	uncharacterized protein Dmel_CG11659 [Drosophila melanogaster]
FBgn0000536	0.240421	0.00718664	0.109764	eas	easily shocked, isoform A [Drosophila melanogaster]
FBgn0036320	-0.361125	0.00726401	0.110782	CG10943	uncharacterized protein Dmel_CG10943 [Drosophila melanogaster]
FBgn0036043	-0.325375	0.00733967	0.111771	CG8177	uncharacterized protein Dmel_CG8177, isoform A [Drosophila melanogaster]
FBgn0000359	1.81885	0.00735813	0.111887	Cp36	chorion protein 36 [Drosophila melanogaster]
FBgn0052082	-0.290149	0.0074016	0.112383	IRSp53	insulin receptor substrate 53 kDa, isoform A [Drosophila melanogaster]
FBgn0266918	0.27455	0.00749048	0.113565	CG32486	uncharacterized protein Dmel_CG32486 [Drosophila melanogaster]
MSTRG.2184	0.401038	0.00753654	0.114096	--	--
FBgn0003499	0.451057	0.00757791	0.114555	sr	stripe, isoform A [Drosophila melanogaster]
FBgn0085434	0.371631	0.00760591	0.11481	NaCP60E	Na channel protein 60E, isoform H [Drosophila melanogaster]
FBgn0034098	-0.272346	0.0076337	0.115062	krimp	krimper [Drosophila melanogaster]
FBgn0014018	-0.187793	0.00767438	0.115507	Rel	relish, isoform A [Drosophila melanogaster]
FBgn0039941	-0.311227	0.00768776	0.11554	CG17167	uncharacterized protein Dmel_CG17167, isoform D [Drosophila melanogaster]
FBgn0034335	-0.209176	0.00770331	0.115605	GstE1	glutathione S transferase E1 [Drosophila melanogaster]
FBgn0026563	-0.671143	0.00775483	0.11621	CG1979	uncharacterized protein Dmel_CG1979 [Drosophila melanogaster]
FBgn0264308	0.695994	0.00782151	0.11704	CG43778	uncharacterized protein Dmel_CG43778, isoform A [Drosophila melanogaster]
FBgn0263118	-0.628621	0.00787983	0.117742	tx	taxi, isoform B [Drosophila melanogaster]
FBgn0052506	0.813587	0.0079413	0.118489	CG32506	RE30781p, partial [Drosophila melanogaster]
FBgn0016122	-0.214187	0.00800894	0.119326	Acer	Angiotensin-converting enzyme-related, isoform B [Drosophila melanogaster]
FBgn0035914	0.665905	0.00805744	0.119876	CG6282	LOW QUALITY PROTEIN: uncharacterized protein LOC6545736 [Drosophila erecta]
FBgn0053217	0.29546	0.00807061	0.1199	CG33217	uncharacterized protein Dmel_CG33217 [Drosophila melanogaster]
FBgn0025709	0.334292	0.00812204	0.12049	CNT2	concentrative nucleoside transporter 2, isoform A [Drosophila melanogaster]
FBgn0038938	0.235246	0.00813604	0.120525	CG7084	uncharacterized protein Dmel_CG7084, isoform E [Drosophila melanogaster]
FBgn0010014	0.729642	0.00820981	0.121444	CanB	DNA repair protein XRCC1 [Drosophila ananassae]
FBgn0043576	-0.441003	0.00833645	0.123141	PGRP-SC1a	peptidoglycan recognition protein SC1b, isoform B [Drosophila melanogaster]
FBgn0030595	-1.80367	0.00835317	0.123212	CG14406	MIP13948p, partial [Drosophila melanogaster]
FBgn0032251	0.356694	0.00836839	0.123261	Nse4	--
FBgn0034629	-0.233295	0.00838995	0.123403	Acox57D-d	acyl-Coenzyme A oxidase at 57D distal [Drosophila melanogaster]
FBgn0036391	0.903937	0.00842009	0.12367	CG17364	uncharacterized protein Dmel_CG17364, isoform C [Drosophila melanogaster]
FBgn0034439	0.465053	0.00857622	0.125785	CG10062	uncharacterized protein Dmel_CG10062, isoform C [Drosophila melanogaster]
FBgn0027087	0.250627	0.00858853	0.125787	HisRS	Histidyl-tRNA synthetase, isoform D [Drosophila melanogaster]
MSTRG.2183	-0.436189	0.00865252	0.126545	--	--
FBgn0259734	-0.249663	0.00873647	0.127592	Nost	nostrin, isoform H [Drosophila melanogaster]
FBgn0026597	-0.247032	0.00876032	0.12776	Axn	axin, isoform A [Drosophila melanogaster]
FBgn0035173	-0.124828	0.00884155	0.128585	CG13907	uncharacterized protein Dmel_CG13907, isoform B [Drosophila melanogaster]
FBgn0033556	0.312235	0.00884178	0.128585	CG12343	uncharacterized protein Dmel_CG12343 [Drosophila melanogaster]
FBgn0001186	-0.221187	0.0088603	0.128631	Hex-A	hexokinase A, isoform A [Drosophila melanogaster]
FBgn0029932	-0.258377	0.00887844	0.128631	CG4607	uncharacterized protein Dmel_CG4607, isoform A [Drosophila melanogaster]
FBgn0052594	-0.284489	0.00888964	0.128631	be	ben, isoform F [Drosophila melanogaster]
FBgn0261089	0.539611	0.00889467	0.128631	Sytalpha	synaptotagmin alpha, isoform B [Drosophila melanogaster]
FBgn0031497	0.242486	0.00905351	0.130745	SerRS	Seryl-tRNA synthetase, isoform B [Drosophila melanogaster]
FBgn0264495	-0.300611	0.0090938	0.130958	gpp	grappa, isoform D [Drosophila melanogaster]
FBgn0035144	0.542921	0.00909686	0.130958	Kah	kahuli [Drosophila melanogaster]
FBgn0003870	-0.243463	0.00910623	0.130958	ttk	tramtrack, isoform G [Drosophila melanogaster]
FBgn0266486	-0.177555	0.00934937	0.134114	CG45085	uncharacterized protein Dmel_CG45085, isoform A [Drosophila melanogaster]
FBgn0038725	0.592278	0.00935167	0.134114	CG6184	uncharacterized protein Dmel_CG6184, isoform F [Drosophila melanogaster]
FBgn0037737	0.319804	0.009365	0.134119	Pnn	pinin, isoform B [Drosophila melanogaster]
FBgn0034642	-0.482749	0.00939998	0.134434	CG15674	uncharacterized protein Dmel_CG15674, isoform B [Drosophila melanogaster]
FBgn0032087	-0.238498	0.00944197	0.134848	CG9568	--
FBgn0013972	0.556613	0.00946696	0.135018	Gycalpha99B	guanylyl cyclase alpha-subunit at 99B [Drosophila melanogaster]
FBgn0261360	-0.276862	0.0095308	0.135742	CG42637	uncharacterized protein Dmel_CG42637, isoform C [Drosophila melanogaster]
FBgn0002778	0.297527	0.00960035	0.136544	mnd	minidiscs, isoform A [Drosophila melanogaster]
FBgn0036024	-0.275185	0.00962543	0.136713	CG18180	FI16825p1, partial [Drosophila melanogaster]
FBgn0039052	0.381344	0.0097097	0.137697	CG6733	uncharacterized protein Dmel_CG6733 [Drosophila melanogaster]
FBgn0040102	-0.532982	0.00972134	0.137697	lectin-24Db	lectin-24Db [Drosophila melanogaster]
FBgn0035481	0.855265	0.0097676	0.137804	CG12605	uncharacterized protein Dmel_CG12605, isoform D [Drosophila melanogaster]
FBgn0030747	-0.220372	0.00977076	0.137804	CG4301	uncharacterized protein Dmel_CG4301, isoform A [Drosophila melanogaster]
FBgn0039431	-0.332188	0.00979958	0.137804	plum	plum, isoform C [Drosophila melanogaster]
FBgn0030505	-0.251787	0.00981775	0.137804	NFAT	NFAT nuclear factor, isoform B [Drosophila melanogaster]
FBgn0040827	0.369995	0.00981876	0.137804	CG13315	uncharacterized protein Dmel_CG13315, isoform B [Drosophila melanogaster]
FBgn0038482	0.55512	0.0098208	0.137804	CG4053	uncharacterized protein Dmel_CG4053 [Drosophila melanogaster]
FBgn0031170	-0.208082	0.00982223	0.137804	ABCA	ATP binding cassette subfamily A, isoform B [Drosophila melanogaster]
FBgn0031494	0.506062	0.00984512	0.137938	CG17219	uncharacterized protein Dmel_CG17219 [Drosophila melanogaster]
FBgn0263289	-0.166503	0.00987557	0.138178	scrib	scribble, isoform L [Drosophila melanogaster]
FBgn0036926	0.40794	0.00991705	0.138571	CG7646	uncharacterized protein Dmel_CG7646, isoform C [Drosophila melanogaster]
FBgn0028855	1.60322	0.00995703	0.138942	CG15282	***** No hits found *****
FBgn0035816	0.854149	0.010047	0.140007	CG13685	uncharacterized protein Dmel_CG13685, isoform D [Drosophila melanogaster]
MSTRG.8527	-0.289575	0.0100699	0.140139	--	--
FBgn0051004	-0.209383	0.0101633	0.141248	mesh	mesh, isoform D [Drosophila melanogaster]
FBgn0026576	-0.199431	0.0102044	0.141412	Pisd	phosphatidylserine decarboxylase, isoform A [Drosophila melanogaster]
FBgn0016984	-0.222946	0.0102101	0.141412	sktl	skittles, isoform B [Drosophila melanogaster]
FBgn0020660	0.277144	0.0102161	0.141412	eIF4B	eukaryotic translation initiation factor 4B, isoform B [Drosophila melanogaster]
FBgn0050480	-0.719673	0.0102307	0.141424	CG30480	uncharacterized protein Dmel_CG30480, isoform B [Drosophila melanogaster]
FBgn0035132	-0.367481	0.010251	0.141516	mthl10	methuselah-like 10, isoform B [Drosophila melanogaster]
MSTRG.2075	0.327618	0.0103041	0.142059	His4	--
FBgn0037176	0.767091	0.0103286	0.142177	CG14456	uncharacterized protein Dmel_CG14456, isoform B [Drosophila melanogaster]
FBgn0259678	-0.286198	0.0103401	0.142177	sqa	spaghetti-squash activator, isoform D [Drosophila melanogaster]
FBgn0058439	0.375799	0.0103589	0.142246	CG40439	uncharacterized protein Dmel_CG40439, isoform A [Drosophila melanogaster]
FBgn0263029	0.623106	0.0103981	0.142595	CG43324	GD11290 [Drosophila simulans]
FBgn0267033	-0.326392	0.0104532	0.143161	mamo	maternal gene required for meiosis, isoform I [Drosophila melanogaster]
FBgn0039889	0.317868	0.0105084	0.143682	Arl4	ADP ribosylation factor-like 4, isoform B [Drosophila melanogaster]
FBgn0037980	0.368931	0.0105191	0.143682	DCAF12	DDB1 and CUL4 associated factor 12, isoform B [Drosophila melanogaster]
FBgn0038074	-1.09055	0.0105468	0.143736	Gnmt	glycine N-methyltransferase [Drosophila melanogaster]
FBgn0002569	-0.260173	0.0105508	0.143736	Mal-A2	maltase A2 [Drosophila melanogaster]
FBgn0034664	-0.361372	0.0105909	0.144092	CG4377	uncharacterized protein Dmel_CG4377 [Drosophila melanogaster]
FBgn0030998	0.48375	0.0106197	0.144132	CG14195	uncharacterized protein Dmel_CG14195, isoform B [Drosophila melanogaster]
FBgn0038516	-0.262552	0.0106217	0.144132	P5cr-2	Pyrroline-5-carboxylate reductase-like 2, isoform A [Drosophila melanogaster]
FBgn0260945	0.239298	0.0106567	0.144417	Atg1	Autophagy-related 1, isoform B [Drosophila melanogaster]
FBgn0038354	-0.497778	0.0106732	0.144452	CG5404	uncharacterized protein Dmel_CG5404 [Drosophila melanogaster]
FBgn0052549	-0.218575	0.0106965	0.144578	CG32549	uncharacterized protein Dmel_CG32549, isoform H [Drosophila melanogaster]
FBgn0029820	-0.195013	0.0107839	0.145382	CG16721	uncharacterized protein Dmel_CG16721, isoform B [Drosophila melanogaster]
FBgn0014011	-0.273097	0.0107962	0.145382	Rac2	Rac2, isoform B [Drosophila melanogaster]
FBgn0033720	0.938013	0.0108068	0.145382	CG13160	uncharacterized protein Dmel_CG13160, isoform B [Drosophila melanogaster]
FBgn0038799	0.654627	0.0108215	0.145382	MFS9	major facilitator superfamily transporter 9, isoform B [Drosophila melanogaster]
FBgn0263490	-0.275164	0.0108264	0.145382	mld	molting defective, isoform D [Drosophila melanogaster]
FBgn0031732	-0.348377	0.0108641	0.1457	CG11149	--
FBgn0036382	1.86138	0.0108947	0.145765	CG13737	uncharacterized protein Dmel_CG13737, isoform A [Drosophila melanogaster]
FBgn0032079	0.335779	0.0109181	0.145765	CG31886	--
FBgn0031693	-0.340447	0.0109336	0.145765	Cyp4ac1	Cyp4ac1 [Drosophila melanogaster]
FBgn0000056	0.426408	0.0109411	0.145765	Adhr	Adh-related, isoform B [Drosophila melanogaster]
FBgn0052523	1.08552	0.0109576	0.145765	CG32523	uncharacterized protein Dmel_CG32523 [Drosophila melanogaster]
FBgn0037146	-0.172938	0.0109638	0.145765	CG7470	uncharacterized protein Dmel_CG7470, isoform B [Drosophila melanogaster]
FBgn0260653	-0.485861	0.0109676	0.145765	serp	serpentine, isoform C [Drosophila melanogaster]
FBgn0031327	-0.421715	0.0110086	0.146121	CG5397	uncharacterized protein Dmel_CG5397, isoform B [Drosophila melanogaster]
FBgn0026565	-0.272211	0.0110378	0.146266	Ass	argininosuccinate synthase, isoform B [Drosophila melanogaster]
FBgn0265267	0.791695	0.0110544	0.146266	CG18258	uncharacterized protein Dmel_CG18258 [Drosophila melanogaster]
FBgn0038956	1.21945	0.0110619	0.146266	CAH8	carbonic anhydrase 8, isoform B [Drosophila melanogaster]
FBgn0034052	0.42691	0.0111164	0.146747	CG8299	uncharacterized protein Dmel_CG8299 [Drosophila melanogaster]
FBgn0004514	0.82852	0.0111267	0.146747	Oct-TyrR	Octopamine-Tyramine receptor, isoform B [Drosophila melanogaster]
FBgn0036454	-0.262208	0.0112238	0.147839	CG17839	uncharacterized protein Dmel_CG17839, isoform B [Drosophila melanogaster]
FBgn0250791	0.271856	0.0112511	0.147995	alphaSnap	alpha soluble NSF attachment protein [Drosophila melanogaster]
FBgn0039313	0.327803	0.0112716	0.147995	CG11892	uncharacterized protein Dmel_CG11892, isoform B [Drosophila melanogaster]
FBgn0001128	-0.155462	0.0112785	0.147995	Gpdh1	RecName: Full=Glycerol-3-phosphate dehydrogenase [NAD(+)], cytoplasmic; Short=GPD-C; Short=GPDH-C [Drosophila melanogaster]
FBgn0031653	0.291078	0.0113105	0.148227	Jon25Biii	jonah 25Biii [Drosophila melanogaster]
FBgn0016797	-0.256531	0.0113448	0.148341	fz2	frizzled 2, isoform C [Drosophila melanogaster]
FBgn0000473	0.80689	0.0113479	0.148341	Cyp6a2	cytochrome P450-6a2 [Drosophila melanogaster]
FBgn0050172	0.88298	0.0114193	0.148807	CG30172	RH70879p, partial [Drosophila melanogaster]
FBgn0027561	-0.19145	0.0114276	0.148807	CG18659	uncharacterized protein Dmel_CG18659, isoform A [Drosophila melanogaster]
FBgn0027930	-0.255166	0.0114339	0.148807	MP1	melanization protease 1, isoform E [Drosophila melanogaster]
FBgn0039958	0.272734	0.0114411	0.148807	CG12567	uncharacterized protein Dmel_CG12567, isoform A [Drosophila melanogaster]
FBgn0015625	-0.299809	0.0114713	0.149012	CycB3	cyclin B3, isoform B [Drosophila melanogaster]
FBgn0051200	-0.385096	0.0116716	0.151424	CG31200	uncharacterized protein Dmel_CG31200 [Drosophila melanogaster]
FBgn0029123	0.807355	0.011711	0.151554	SoxN	SoxNeuro, isoform A [Drosophila melanogaster]
FBgn0039827	0.42148	0.0117203	0.151554	CG1544	uncharacterized protein Dmel_CG1544 [Drosophila melanogaster]
FBgn0031473	0.513918	0.0117257	0.151554	CG3104	uncharacterized protein Dmel_CG3104, isoform C [Drosophila melanogaster]
FBgn0038207	-1.25272	0.0117455	0.151621	CG14356	uncharacterized protein Dmel_CG14356 [Drosophila melanogaster]
FBgn0261547	-0.104211	0.0117757	0.151821	Exn	ephexin, isoform E [Drosophila melanogaster]
FBgn0041707	0.349682	0.0118296	0.152183	7B2	7B2, isoform B [Drosophila melanogaster]
FBgn0029105	0.713217	0.0118332	0.152183	alpha-Catr	alpha-catenin related, isoform C [Drosophila melanogaster]
FBgn0030320	-0.26571	0.0119209	0.15294	CG2247	uncharacterized protein Dmel_CG2247, isoform B [Drosophila melanogaster]
FBgn0264006	0.481533	0.0119216	0.15294	dysc	dyschronic, isoform H [Drosophila melanogaster]
FBgn0004647	-0.271484	0.0119503	0.153118	N	Notch growth factor [Drosophila melanogaster]
FBgn0013272	-0.177668	0.0119785	0.153289	Gp150	Gp150, isoform D [Drosophila melanogaster]
FBgn0264490	-0.276898	0.0120419	0.153694	Eip93F	Ecdysone-induced protein 93F, isoform B [Drosophila melanogaster]
FBgn0005586	0.450844	0.0120419	0.153694	Rab3	Rab3, isoform B [Drosophila melanogaster]
FBgn0004167	-0.189684	0.0120547	0.153694	kst	karst, isoform E [Drosophila melanogaster]
FBgn0053301	-0.281521	0.0122183	0.155588	CG33301	--
FBgn0030218	0.31435	0.0122514	0.155817	CG1628	FI24221p1, partial [Drosophila melanogaster]
FBgn0039310	0.257839	0.012463	0.158313	CG11878	uncharacterized protein Dmel_CG11878 [Drosophila melanogaster]
FBgn0033033	0.4566	0.0124928	0.158498	scaf	scarface, isoform B [Drosophila melanogaster]
FBgn0032088	-0.355664	0.0126472	0.160124	CG13102	--
FBgn0030776	0.317438	0.012652	0.160124	CG4653	uncharacterized protein Dmel_CG4653 [Drosophila melanogaster]
FBgn0031169	-0.801671	0.0127966	0.161756	CG1494	uncharacterized protein Dmel_CG1494, isoform C [Drosophila melanogaster]
FBgn0020513	-0.180407	0.012893	0.162776	Paics	PAICS bifunctional enzyme, isoform A [Drosophila melanogaster]
FBgn0003011	1.20558	0.0129174	0.162845	ort	ora transientless [Drosophila melanogaster]
FBgn0085447	0.408374	0.0129299	0.162845	sif	still life, isoform J [Drosophila melanogaster]
FBgn0031800	-0.356118	0.0129696	0.163145	CG9497	--
FBgn0086450	0.254509	0.0131225	0.164868	su(r)	suppressor of rudimentary [Drosophila melanogaster]
FBgn0034663	-0.725261	0.0133776	0.16787	CG4363	uncharacterized protein Dmel_CG4363 [Drosophila melanogaster]
FBgn0086675	0.620763	0.0134187	0.168149	fne	found in neurons, isoform B [Drosophila melanogaster]
FBgn0050022	0.382559	0.0134324	0.168149	CG30022	uncharacterized protein Dmel_CG30022 [Drosophila melanogaster]
FBgn0263346	-0.163351	0.0134522	0.168193	smash	smallish, isoform O [Drosophila melanogaster]
FBgn0036984	0.641821	0.0134785	0.168319	CG13248	uncharacterized protein Dmel_CG13248 [Drosophila melanogaster]
FBgn0036978	0.830519	0.0135594	0.168828	Toll-9	Toll-9, isoform C [Drosophila melanogaster]
FBgn0038525	0.857101	0.0136082	0.168828	CG14329	uncharacterized protein Dmel_CG14329 [Drosophila melanogaster]
FBgn0284257	0.243086	0.0136099	0.168828	Ttd14	TRPL translocation defect 14, isoform C [Drosophila melanogaster]
FBgn0020493	-0.255193	0.0136131	0.168828	Dad	daughters against dpp, isoform C [Drosophila melanogaster]
FBgn0029708	0.662255	0.013616	0.168828	CG3556	uncharacterized protein Dmel_CG3556, isoform B [Drosophila melanogaster]
FBgn0012037	-0.178853	0.0136173	0.168828	Ance	angiotensin converting enzyme, isoform C [Drosophila melanogaster]
FBgn0030342	0.308017	0.0136543	0.169085	CG10347	uncharacterized protein Dmel_CG10347, isoform A [Drosophila melanogaster]
FBgn0041160	-0.392537	0.0136768	0.169161	comm2	comm2 [Drosophila melanogaster]
FBgn0261444	-0.234558	0.0137455	0.1698	CG3638	uncharacterized protein Dmel_CG3638, isoform J [Drosophila melanogaster]
FBgn0265959	0.550516	0.0137748	0.1698	rdgC	retinal degeneration C, isoform F [Drosophila melanogaster]
FBgn0036890	0.77728	0.0137778	0.1698	CG9368	uncharacterized protein Dmel_CG9368, isoform A [Drosophila melanogaster]
FBgn0011474	-0.341474	0.0138297	0.170237	PR-Set7	PR/SET domain containing protein 7, isoform D [Drosophila melanogaster]
FBgn0052407	-0.63743	0.0139088	0.171007	CG32407	uncharacterized protein Dmel_CG32407, isoform B [Drosophila melanogaster]
FBgn0030756	-0.656268	0.0140053	0.171989	CG9903	uncharacterized protein Dmel_CG9903 [Drosophila melanogaster]
FBgn0033233	-0.310968	0.0140589	0.172443	Kdm4A	lysine (K)-specific demethylase 4A, isoform A [Drosophila melanogaster]
FBgn0024238	-0.174275	0.0140814	0.172514	Fim	fimbrin, isoform D [Drosophila melanogaster]
FBgn0052669	0.412947	0.0141065	0.17255	CG32669	uncharacterized protein Dmel_CG32669 [Drosophila melanogaster]
FBgn0262733	-0.319645	0.0141625	0.17255	Src64B	Src oncogene at 64B, isoform K [Drosophila melanogaster]
FBgn0037387	-0.204436	0.0141626	0.17255	CG1213	uncharacterized protein Dmel_CG1213, isoform D [Drosophila melanogaster]
FBgn0040503	1.01136	0.0141628	0.17255	CG7763	uncharacterized protein Dmel_CG7763, isoform C [Drosophila melanogaster]
FBgn0264606	0.645771	0.0141678	0.17255	Fife	fife, isoform D [Drosophila melanogaster]
FBgn0036956	1.32931	0.0142194	0.172975	CG13813	uncharacterized protein Dmel_CG13813 [Drosophila melanogaster]
FBgn0030514	-0.228162	0.0143539	0.174406	CG9941	uncharacterized protein Dmel_CG9941 [Drosophila melanogaster]
FBgn0037736	0.703189	0.01441	0.174844	side-VII	sidestep VII, isoform B [Drosophila melanogaster]
FBgn0037391	0.332232	0.0144238	0.174844	CG2017	uncharacterized protein Dmel_CG2017, isoform A [Drosophila melanogaster]
FBgn0053547	0.554413	0.0145022	0.175485	Rim	Rab3 interacting molecule, isoform F [Drosophila melanogaster]
FBgn0027081	0.205108	0.0145106	0.175485	ThrRS	Threonyl-tRNA synthetase, isoform D [Drosophila melanogaster]
FBgn0040505	0.370795	0.0146258	0.176485	Alk	anaplastic lymphoma kinase, isoform B [Drosophila melanogaster]
FBgn0017578	0.332688	0.0146275	0.176485	Max	Max, isoform C [Drosophila melanogaster]
FBgn0010611	0.241861	0.0146797	0.176909	Hmgs	HMG coenzyme A synthase, isoform F [Drosophila melanogaster]
FBgn0027106	-0.221235	0.0147583	0.177649	Inx7	innexin 7 [Drosophila melanogaster]
FBgn0035694	0.445852	0.0149493	0.17974	CG13299	uncharacterized protein Dmel_CG13299 [Drosophila melanogaster]
FBgn0000043	-0.193327	0.0149796	0.179895	Act42A	actin 42A [Drosophila melanogaster]
FBgn0037207	-0.193717	0.0150786	0.180874	Mes2	Mesoderm-expressed 2, isoform B [Drosophila melanogaster]
FBgn0032322	0.291875	0.015113	0.181076	CG16743	--
FBgn0000097	-0.255923	0.0151318	0.181092	aop	anterior open, isoform C [Drosophila melanogaster]
FBgn0032297	-0.361631	0.0152361	0.182129	CG17124	--
FBgn0001941	-0.162068	0.0152801	0.182444	ifc	infertile crescent, isoform A [Drosophila melanogaster]
FBgn0000721	-0.144261	0.0153054	0.182515	for	foraging, isoform A [Drosophila melanogaster]
FBgn0013342	0.305843	0.0153213	0.182515	nSyb	neuronal synaptobrevin, isoform J [Drosophila melanogaster]
FBgn0050359	-0.247922	0.0153436	0.18257	Mal-A5	maltase A5, isoform A [Drosophila melanogaster]
FBgn0038849	-0.74006	0.0153762	0.182747	CG7079	uncharacterized protein Dmel_CG7079, isoform B [Drosophila melanogaster]
FBgn0036494	1.25054	0.0155641	0.184417	Toll-6	RE48314p [Drosophila melanogaster]
FBgn0034145	0.200956	0.01557	0.184417	CG5065	uncharacterized protein Dmel_CG5065, isoform B [Drosophila melanogaster]
FBgn0042103	-0.526841	0.015575	0.184417	CG18746	uncharacterized protein Dmel_CG18746 [Drosophila melanogaster]
FBgn0034296	-0.187654	0.0156052	0.184417	CG10912	uncharacterized protein Dmel_CG10912 [Drosophila melanogaster]
FBgn0037092	-0.280221	0.0156059	0.184417	M6	M6, isoform F [Drosophila melanogaster]
FBgn0261928	0.518467	0.0156823	0.185109	CG42795	uncharacterized protein Dmel_CG42795, isoform G [Drosophila melanogaster]
FBgn0032618	-0.243965	0.0157366	0.185537	CG31743	--
FBgn0037016	-0.227881	0.0159032	0.187288	CG13252	uncharacterized protein Dmel_CG13252 [Drosophila melanogaster]
FBgn0034784	-1.15788	0.0159804	0.187984	CG9826	uncharacterized protein Dmel_CG9826, isoform A [Drosophila melanogaster]
FBgn0262975	-0.142265	0.0161197	0.189407	cnc	cap-n-collar, isoform J [Drosophila melanogaster]
FBgn0033730	1.79497	0.0162727	0.190936	Cpr49Ag	FI14105p, partial [Drosophila melanogaster]
FBgn0261808	-0.197253	0.0162868	0.190936	cu	curled, isoform D [Drosophila melanogaster]
FBgn0260995	0.631218	0.016346	0.191413	dpr21	defective proboscis extension response 21 [Drosophila melanogaster]
FBgn0263593	-0.183631	0.0164471	0.191938	Lpin	lipin, isoform M [Drosophila melanogaster]
FBgn0086448	0.374707	0.0164717	0.191938	PIG-Q	phosphatidylinositol glycan anchor biosynthesis class Q, isoform C [Drosophila melanogaster]
FBgn0259745	-0.232022	0.0164806	0.191938	wech	wech, isoform D [Drosophila melanogaster]
FBgn0035360	-0.211563	0.0164861	0.191938	CG1246	uncharacterized protein Dmel_CG1246, isoform C [Drosophila melanogaster]
FBgn0064237	-0.240629	0.0164866	0.191938	Idgf5	imaginal disc growth factor 5 [Drosophila melanogaster]
FBgn0264607	0.241002	0.0165042	0.191938	CaMKII	Calcium/calmodulin-dependent protein kinase II, isoform J [Drosophila melanogaster]
FBgn0263873	-0.228739	0.0165208	0.191938	sick	sickie, isoform I [Drosophila melanogaster]
FBgn0042189	8.74819	0.0165451	1	CG17376	uncharacterized protein Dmel_CG17376, isoform C [Drosophila melanogaster]
FBgn0085390	0.393664	0.0165657	0.192244	Dgk	diacyl glycerol kinase, isoform H [Drosophila melanogaster]
FBgn0051189	-0.982639	0.0167708	0.194406	CG31189	uncharacterized protein Dmel_CG31189 [Drosophila melanogaster]
FBgn0034501	0.218985	0.0170565	0.197305	CG13868	uncharacterized protein Dmel_CG13868, isoform B [Drosophila melanogaster]
FBgn0011581	0.35795	0.017059	0.197305	Ms	uncharacterized protein Dsimw501_GD21092, isoform A [Drosophila simulans]
FBgn0265003	-0.198056	0.0170826	0.197356	koi	klaroid, isoform A [Drosophila melanogaster]
FBgn0040349	0.335888	0.0171559	0.197982	CG3699	RH05486p, partial [Drosophila melanogaster]
FBgn0036007	0.230924	0.0172587	0.198931	path	pathetic, isoform D [Drosophila melanogaster]
FBgn0003575	-0.262603	0.0172947	0.198931	su(sable)	suppressor of sable, isoform C [Drosophila melanogaster]
FBgn0004622	-0.764255	0.0172959	0.198931	TkR99D	Tachykinin-like receptor at 99D, isoform A [Drosophila melanogaster]
FBgn0000490	-0.410723	0.0174078	0.199996	dpp	decapentaplegic, isoform A [Drosophila melanogaster]
FBgn0004580	0.375564	0.0174542	0.200059	Cbp53E	calbindin 53E, isoform B [Drosophila melanogaster]
FBgn0003651	0.31526	0.0174638	0.200059	svp	seven up, isoform A [Drosophila melanogaster]
FBgn0038455	0.397671	0.0175119	0.200059	CG14907	MIP04624p, partial [Drosophila melanogaster]
FBgn0052350	0.25801	0.017549	0.200059	Vps11	vacuolar protein sorting 11 [Drosophila melanogaster]
FBgn0000547	-0.31433	0.0175529	0.200059	ed	echinoid, isoform B [Drosophila melanogaster]
FBgn0035432	-0.180552	0.0175735	0.200059	ZnT63C	zinc transporter 63C, isoform F [Drosophila melanogaster]
FBgn0040297	-0.314919	0.0175815	0.200059	Nhe2	Na[+]/H[+] hydrogen exchanger 2, isoform G [Drosophila melanogaster]
FBgn0035050	1.0416	0.0175842	0.200059	SiaT	sialyltransferase, isoform B [Drosophila melanogaster]
FBgn0034141	-0.203481	0.0175874	0.200059	CG8311	uncharacterized protein Dmel_CG8311 [Drosophila melanogaster]
FBgn0085433	0.446548	0.0176163	0.200168	CG34404	uncharacterized protein Dmel_CG34404, isoform C [Drosophila melanogaster]
FBgn0262539	-0.511474	0.0177579	0.201555	CG43093	MIP06286p, partial [Drosophila melanogaster]
FBgn0086347	-0.185252	0.0178021	0.201835	Myo31DF	myosin 31DF, isoform C [Drosophila melanogaster]
FBgn0034493	0.432641	0.0179845	0.20368	CG8908	uncharacterized protein Dmel_CG8908 [Drosophila melanogaster]
FBgn0035358	0.415358	0.0180275	0.203944	CG14949	uncharacterized protein Dmel_CG14949 [Drosophila melanogaster]
FBgn0003944	-0.597453	0.0180519	0.203997	Ubx	homeotic protein ultrabithorax isoform X1 [Drosophila sechellia]
FBgn0052774	2.08762	0.0180868	0.204039	Muc4B	mucin 4B, isoform C [Drosophila melanogaster]
FBgn0040259	-0.210725	0.0180952	0.204039	Ugt302C1	UDP-glycosyltransferase family 302 member C1 [Drosophila melanogaster]
FBgn0032144	-0.177678	0.0181262	0.204167	CG17633	--
FBgn0037504	0.329572	0.0181685	0.20442	CG1142	uncharacterized protein Dmel_CG1142 [Drosophila melanogaster]
FBgn0036587	-0.328037	0.0181972	0.204521	CG4950	IP22154p, partial [Drosophila melanogaster]
FBgn0015924	-0.155654	0.0182589	0.20479	crq	croquemort, isoform C [Drosophila melanogaster]
FBgn0037615	0.924655	0.0182608	0.20479	CG11760	uncharacterized protein Dmel_CG11760 [Drosophila melanogaster]
FBgn0035880	-0.226625	0.01841	0.20624	Culd	CUB and LDLa domain, isoform A [Drosophila melanogaster]
FBgn0033636	-0.235903	0.018445	0.206382	tou	toutatis, isoform E [Drosophila melanogaster]
FBgn0270925	4.70044	0.0184538	1	CG4836	uncharacterized protein Dmel_CG4836, isoform E [Drosophila melanogaster]
FBgn0020251	-0.238631	0.0184626	0.206382	sfl	sulfateless, isoform B [Drosophila melanogaster]
FBgn0032603	-0.35166	0.0185132	0.206606	CG17928	--
FBgn0035505	0.883713	0.0185226	0.206606	Teh2	tipE homolog 2, isoform B [Drosophila melanogaster]
FBgn0004370	-0.204725	0.0186628	0.20787	Ptp10D	protein tyrosine phosphatase 10D, isoform H [Drosophila melanogaster]
FBgn0032305	0.285228	0.0186761	0.20787	CG6700	--
FBgn0032127	1.72854	0.0187119	0.208044	CG13114	--
FBgn0051288	-0.266296	0.0187332	0.208057	CG31288	uncharacterized protein Dmel_CG31288 [Drosophila melanogaster]
FBgn0259707	0.720802	0.0187612	0.208145	CG42361	GH24926p, partial [Drosophila melanogaster]
FBgn0016075	-0.164027	0.0187899	0.208239	vkg	viking, isoform B [Drosophila melanogaster]
FBgn0020764	0.238944	0.018831	0.208472	Alas	aminolevulinate synthase [Drosophila melanogaster]
FBgn0011260	-0.229834	0.0190275	0.210422	Sema2a	semaphorin 2a, isoform A [Drosophila melanogaster]
FBgn0037386	-0.415364	0.0191056	0.21106	CG1208	uncharacterized protein Dmel_CG1208, isoform C [Drosophila melanogaster]
FBgn0259878	-0.359575	0.0191664	0.211505	Fs	follistatin, isoform A [Drosophila melanogaster]
FBgn0026718	0.290843	0.0191885	0.211524	Agpat2	1-Acylglycerol-3-phosphate O-acyltransferase 2, isoform C [Drosophila melanogaster]
FBgn0263220	0.56172	0.0194128	0.213768	Hk	hyperkinetic, isoform F [Drosophila melanogaster]
FBgn0038033	-0.197148	0.0194611	0.213976	CG10097	uncharacterized protein Dmel_CG10097, isoform B [Drosophila melanogaster]
FBgn0032287	0.34977	0.0194731	0.213976	CG6415	--
FBgn0035423	0.233219	0.0195258	0.214147	eIF1	eukaryotic translation initiation factor 1 [Drosophila melanogaster]
FBgn0051664	-0.483542	0.01953	0.214147	CG31664	uncharacterized protein Dmel_CG31664, isoform E [Drosophila melanogaster]
FBgn0028920	-0.198373	0.0195553	0.214197	CG8997	LP19506p, partial [Drosophila melanogaster]
FBgn0037251	0.427178	0.0197027	0.215583	CG9804	uncharacterized protein Dmel_CG9804, isoform B [Drosophila melanogaster]
FBgn0005614	0.30194	0.0197596	0.215821	trpl	transient receptor potential-like, isoform A [Drosophila melanogaster]
FBgn0034362	0.275352	0.0197662	0.215821	CG5323	uncharacterized protein Dmel_CG5323 [Drosophila melanogaster]
FBgn0031261	-0.283092	0.0198171	0.216017	nAChRbeta3	nicotinic acetylcholine receptor beta3 [Drosophila melanogaster]
FBgn0015037	0.244417	0.0198449	0.216017	Cyp4p1	cytochrome P450-4p1 [Drosophila melanogaster]
FBgn0011296	0.302397	0.0198469	0.216017	l(2)efl	lethal (2) essential for life, isoform C [Drosophila melanogaster]
FBgn0034583	0.220507	0.0198805	0.21612	CG10527	LD46156p, partial [Drosophila melanogaster]
FBgn0015399	-0.349983	0.0199007	0.21612	kek1	kekkon 1, isoform C [Drosophila melanogaster]
FBgn0040262	-0.523874	0.019919	0.21612	Ugt37C2	IP03347p, partial [Drosophila melanogaster]
FBgn0051619	0.346176	0.0199408	0.21613	nolo	no long nerve cord, isoform C [Drosophila melanogaster]
FBgn0086613	-0.253633	0.0201365	0.218022	Ino80	INO80 complex subunit [Drosophila melanogaster]
FBgn0038658	0.234997	0.0203322	0.219911	CG14292	LP20351p, partial [Drosophila melanogaster]
FBgn0262683	-1.29412	0.0203609	0.219989	CG43153	uncharacterized protein Dmel_CG43153 [Drosophila melanogaster]
FBgn0085484	-0.17765	0.020382	0.219989	Pdxk	pyridoxal kinase [Drosophila melanogaster]
FBgn0031760	0.701735	0.0204095	0.220056	Tsp26A	--
FBgn0053203	0.667257	0.0205101	0.220852	CG33203	uncharacterized protein Dmel_CG33203, isoform E [Drosophila melanogaster]
FBgn0051547	0.331542	0.020526	0.220852	NKCC	sodium potassium chloride cotransporter, isoform B [Drosophila melanogaster]
FBgn0025697	-0.313099	0.0205833	0.221238	santa-maria	scavenger receptor acting in neural tissue and majority of rhodopsin is absent, isoform C [Drosophila melanogaster]
FBgn0034606	-0.292595	0.0206185	0.221386	ASPP	Ankyrin-repeat, SH3-domain, and Proline-rich-region containing protein, isoform B [Drosophila melanogaster]
FBgn0051205	-0.467982	0.0206775	0.22179	CG31205	uncharacterized protein Dmel_CG31205, isoform C [Drosophila melanogaster]
FBgn0262871	-0.252055	0.0207333	0.222158	lute	lute, isoform B [Drosophila melanogaster]
FBgn0030520	-0.20671	0.0207655	0.222272	Pdcd4	programmed cell death 4, isoform B [Drosophila melanogaster]
FBgn0053110	-0.391289	0.0208364	0.222801	CG33110	uncharacterized protein Dmel_CG33110 [Drosophila melanogaster]
FBgn0031010	-0.355978	0.0209286	0.223346	CG8028	uncharacterized protein Dmel_CG8028, isoform C [Drosophila melanogaster]
FBgn0033903	0.313421	0.0209306	0.223346	CG8323	uncharacterized protein Dmel_CG8323 [Drosophila melanogaster]
FBgn0040602	0.262999	0.0210447	0.224333	CG14545	uncharacterized protein Dmel_CG14545 [Drosophila melanogaster]
FBgn0259146	0.954912	0.0210791	0.224468	fid	fire dancer [Drosophila melanogaster]
FBgn0037326	0.676345	0.0212453	0.226005	CG14669	uncharacterized protein Dmel_CG14669, isoform B [Drosophila melanogaster]
FBgn0267861	0.318047	0.0213495	0.22672	Maf1	Maf1, isoform A [Drosophila melanogaster]
FBgn0038038	-0.175032	0.0213724	0.22672	Sccpdh2	saccheropin dehydrogenase 2 [Drosophila melanogaster]
FBgn0086254	0.213613	0.0213783	0.22672	CG6084	uncharacterized protein Dmel_CG6084, isoform B [Drosophila melanogaster]
FBgn0000286	-0.233724	0.0215891	0.22872	Cf2	chorion factor 2, isoform E [Drosophila melanogaster]
FBgn0039359	-0.156926	0.0218429	0.231173	RpL27	ribosomal protein L27, isoform B [Drosophila melanogaster]
FBgn0033093	0.272321	0.021881	0.231339	CG3270	uncharacterized protein Dmel_CG3270 [Drosophila melanogaster]
FBgn0259748	-0.20291	0.0219145	0.231456	CG42397	IP18112p, partial [Drosophila melanogaster]
FBgn0002573	-1.37638	0.0219686	0.231709	sens	senseless [Drosophila melanogaster]
FBgn0035083	0.2173	0.0219832	0.231709	Tina-1	troponin C-akin-1, isoform A [Drosophila melanogaster]
FBgn0065032	0.404685	0.0221461	0.233188	Arpc3B	Actin-related protein 2/3 complex, subunit 3B, isoform A [Drosophila melanogaster]
FBgn0033987	-0.219193	0.0223329	0.234916	ckn	caskin, isoform E [Drosophila melanogaster]
FBgn0260770	0.638847	0.0224452	0.23569	CG42568	***** No hits found *****
FBgn0003357	0.206922	0.0224641	0.23569	Jon99Ciii	LP12217p, partial [Drosophila melanogaster]
FBgn0039464	0.244829	0.0224749	0.23569	CG6330	uncharacterized protein Dmel_CG6330, isoform A [Drosophila melanogaster]
FBgn0021872	-0.140172	0.0225576	0.236317	Xbp1	X box binding protein-1, isoform E [Drosophila melanogaster]
FBgn0031313	-0.176459	0.022743	0.238019	CG5080	uncharacterized protein Dmel_CG5080, isoform C [Drosophila melanogaster]
FBgn0051217	-0.23272	0.0227978	0.238351	modSP	modular serine protease [Drosophila melanogaster]
FBgn0034725	0.508066	0.0228874	0.239046	CG6044	uncharacterized protein Dmel_CG6044, isoform G [Drosophila melanogaster]
FBgn0041723	0.528077	0.0229838	0.239811	rho-5	rhomboid-5 [Drosophila melanogaster]
FBgn0027562	0.39241	0.0230628	0.240392	CG10345	uncharacterized protein Dmel_CG10345 [Drosophila melanogaster]
FBgn0050460	-0.215396	0.0231025	0.240564	CG30460	uncharacterized protein Dmel_CG30460, isoform C [Drosophila melanogaster]
FBgn0037817	-0.460401	0.023145	0.240764	Cyp12e1	Cyp12e1 [Drosophila melanogaster]
FBgn0261616	0.385974	0.023208	0.241113	CG42705	uncharacterized protein Dmel_CG42705, isoform A [Drosophila melanogaster]
FBgn0028481	0.561456	0.0232511	0.241113	CG4341	uncharacterized protein Dmel_CG4341, isoform A [Drosophila melanogaster]
FBgn0030984	0.535055	0.0232543	0.241113	tgy	twiggy, isoform E [Drosophila melanogaster]
FBgn0038076	0.590367	0.0232718	0.241113	Cyp313a4	Cyp313a4 [Drosophila melanogaster]
FBgn0020385	-0.187831	0.0234295	0.242504	pug	pugilist, isoform D [Drosophila melanogaster]
FBgn0028499	0.378512	0.0234908	0.242895	CG7985	uncharacterized protein Dmel_CG7985, isoform B [Drosophila melanogaster]
FBgn0051086	0.246582	0.023554	0.243305	CG31086	uncharacterized protein Dmel_CG31086, isoform B [Drosophila melanogaster]
FBgn0004656	-0.228119	0.023666	0.244218	fs(1)h	female sterile (1) homeotic, isoform G [Drosophila melanogaster]
FBgn0004921	0.180076	0.023701	0.244335	Ggamma1	G protein gamma 1, isoform C [Drosophila melanogaster]
FBgn0035715	-0.188604	0.0238282	0.245402	CG10103	uncharacterized protein Dmel_CG10103, isoform A [Drosophila melanogaster]
FBgn0039049	0.226098	0.0238524	0.245407	CG6726	uncharacterized protein Dmel_CG6726, isoform C [Drosophila melanogaster]
FBgn0027836	0.258623	0.0239773	0.246447	Dgp-1	Dgp-1, isoform B [Drosophila melanogaster]
FBgn0030807	-8.69116	0.0240452	1	CG13000	MIP30909p, partial [Drosophila melanogaster]
FBgn0027280	-0.16023	0.0240619	0.246914	l(1)G0193	lethal (1) G0193, isoform A [Drosophila melanogaster]
FBgn0014906	-0.158089	0.0240706	0.246914	Hydr2	alpha/beta hydrolase2, isoform B [Drosophila melanogaster]
FBgn0027575	0.458688	0.0241139	0.247114	GABA-B-R2	metabotropic GABA-B receptor subtype 2, isoform C [Drosophila melanogaster]
FBgn0032167	0.226651	0.0241485	0.247223	CG5853	--
FBgn0038165	0.911644	0.0242209	0.247719	Task6	TWIK-related acid-sensitive K[+] channel 6, isoform F [Drosophila melanogaster]
FBgn0001263	0.345156	0.0242723	0.247999	inaD	inactivation no afterpotential D, isoform B [Drosophila melanogaster]
FBgn0039031	-0.242575	0.0243564	0.248613	Gbp3	Growth-blocking peptide 3, isoform B [Drosophila melanogaster]
FBgn0003366	-0.238386	0.0244221	0.249038	sev	sevenless [Drosophila melanogaster]
FBgn0013750	0.215204	0.0244652	0.249231	Arf51F	ADP ribosylation factor at 51F, isoform A [Drosophila melanogaster]
FBgn0024991	-0.17903	0.0245097	0.24944	CG2694	uncharacterized protein Dmel_CG2694, isoform A [Drosophila melanogaster]
FBgn0085446	-0.152607	0.0246654	0.250777	CG34417	uncharacterized protein Dmel_CG34417, isoform T [Drosophila melanogaster]
FBgn0085413	0.604699	0.0247224	0.250901	CG34384	uncharacterized protein Dmel_CG34384, isoform E [Drosophila melanogaster]
FBgn0023512	0.259498	0.0247262	0.250901	eIF2Bepsilon	eukaryotic translation initiation factor 2B subunit epsilon, isoform A [Drosophila melanogaster]
FBgn0037288	0.340622	0.0247806	0.251016	CG14661	uncharacterized protein Dmel_CG14661, isoform B [Drosophila melanogaster]
FBgn0034736	-0.423038	0.024786	0.251016	gas	gasoline [Drosophila melanogaster]
FBgn0038436	2.06609	0.0250422	1	Gyc89Db	guanylyl cyclase at 89Db [Drosophila melanogaster]
FBgn0032809	1.13006	0.0250453	0.253394	CG13078	uncharacterized protein Dmel_CG13078 [Drosophila melanogaster]
MSTRG.10971	-0.605013	0.0251173	0.253874	--	--
FBgn0051207	-0.405156	0.0251527	0.253905	CG31207	uncharacterized protein Dmel_CG31207 [Drosophila melanogaster]
FBgn0039601	-0.208843	0.0251695	0.253905	CG1523	uncharacterized protein Dmel_CG1523 [Drosophila melanogaster]
FBgn0030400	-0.229864	0.0252242	0.253987	Pits	protein interacting with Ttk69 and Sin3A, isoform D [Drosophila melanogaster]
FBgn0052115	0.613483	0.0252267	0.253987	CG32115	uncharacterized protein Dmel_CG32115 [Drosophila melanogaster]
FBgn0000256	-0.227361	0.0253248	0.254726	capu	cappuccino, isoform F [Drosophila melanogaster]
FBgn0031389	0.377188	0.0253946	0.25518	CG4259	uncharacterized protein Dmel_CG4259, isoform B [Drosophila melanogaster]
FBgn0030519	-0.177024	0.0254876	0.255866	CG11151	uncharacterized protein Dmel_CG11151, isoform B [Drosophila melanogaster]
FBgn0031969	-0.150526	0.0255484	0.255988	pes	--
FBgn0261570	-0.229117	0.0255493	0.255988	raskol	uncharacterized protein Dmel_CG42684, isoform I [Drosophila melanogaster]
FBgn0003557	-0.147851	0.0255825	0.256049	Su(dx)	suppressor of deltex, isoform F [Drosophila melanogaster]
FBgn0000546	-0.250489	0.0256049	0.256049	EcR	ecdysone receptor, isoform G [Drosophila melanogaster]
FBgn0066084	-0.243393	0.0257621	0.257369	RpL41	***** No hits found *****
FBgn0033658	-1.10561	0.0257867	0.257369	Twdlbeta	tweedlebeta [Drosophila melanogaster]
FBgn0010504	-0.185838	0.0258228	0.257481	kermit	kermit, isoform E [Drosophila melanogaster]
FBgn0040099	0.348458	0.0259907	0.258905	lectin-28C	--
FBgn0027296	-0.252077	0.0260378	0.259125	temp	tempura, isoform B [Drosophila melanogaster]
FBgn0037870	0.735374	0.0262019	0.260493	CG18577	uncharacterized protein Dmel_CG18577 [Drosophila melanogaster]
FBgn0034706	0.334405	0.0262257	0.260493	CG11275	uncharacterized protein Dmel_CG11275 [Drosophila melanogaster]
FBgn0261990	-0.257754	0.026307	0.26105	CG42808	uncharacterized protein Dmel_CG42808 [Drosophila melanogaster]
FBgn0030748	-0.245199	0.0264355	0.262074	Traf-like	TNF-receptor-associated factor-like, isoform A [Drosophila melanogaster]
FBgn0027363	-0.21144	0.0264954	0.262265	Stam	signal transducing adaptor molecule [Drosophila melanogaster]
FBgn0004654	0.207237	0.0265193	0.262265	Pgd	phosphogluconate dehydrogenase, isoform B [Drosophila melanogaster]
FBgn0286213	-0.140904	0.0265466	0.262265	RpS12	40S ribosomal protein S12, partial [Drosophila melanogaster]
FBgn0011280	0.303008	0.0265562	0.262265	Obp19d	FI09202p, partial [Drosophila melanogaster]
FBgn0264975	-0.164364	0.0268121	0.264539	Nrg	neuroglian, isoform G [Drosophila melanogaster]
FBgn0050020	-0.25036	0.0269546	0.265692	CG30020	uncharacterized protein Dmel_CG30020, isoform A [Drosophila melanogaster]
FBgn0026160	-0.296017	0.02706	0.26641	tna	AT07790p [Drosophila melanogaster]
FBgn0039452	0.314032	0.027079	0.26641	CG14245	uncharacterized protein Dmel_CG14245, isoform B [Drosophila melanogaster]
FBgn0039472	0.403851	0.0274152	0.269461	CG17192	uncharacterized protein Dmel_CG17192 [Drosophila melanogaster]
FBgn0037941	0.722015	0.027491	0.269928	CG12594	IP13133p [Drosophila melanogaster]
FBgn0031745	-0.272049	0.0275149	0.269928	rau	--
FBgn0259227	-0.200403	0.0275789	0.270299	CG42327	uncharacterized protein Dmel_CG42327 [Drosophila melanogaster]
FBgn0052369	-0.202464	0.0276604	0.270842	CG32369	uncharacterized protein Dmel_CG32369, isoform C [Drosophila melanogaster]
FBgn0023407	-0.15327	0.0277034	0.271006	B4	B4, isoform C [Drosophila melanogaster]
FBgn0035087	-0.161809	0.0278816	0.272462	CG2765	RE58929p [Drosophila melanogaster]
FBgn0052282	-1.53605	0.0279049	0.272462	Drsl4	IP20720p, partial [Drosophila melanogaster]
FBgn0000559	-0.143159	0.028025	0.273376	eEF2	eukaryotic translation elongation factor 2, isoform A [Drosophila melanogaster]
FBgn0035343	0.291383	0.0280578	0.273438	CG16762	uncharacterized protein Dmel_CG16762 [Drosophila melanogaster]
FBgn0260660	-0.340755	0.0280851	0.273446	Mp	multiplexin, isoform R [Drosophila melanogaster]
FBgn0034733	-0.199182	0.0281163	0.273492	CG4752	uncharacterized protein Dmel_CG4752 [Drosophila melanogaster]
FBgn0002789	0.212165	0.0281714	0.273771	Mp20	muscle protein 20, isoform C [Drosophila melanogaster]
FBgn0030711	0.268327	0.0282885	0.274487	Rrp47	ribosomal RNA processing 47, isoform B [Drosophila melanogaster]
FBgn0029903	-0.218531	0.0282982	0.274487	pod1	pod1, isoform G [Drosophila melanogaster]
FBgn0041111	-0.224265	0.028418	0.27539	lilli	lilliputian, isoform D [Drosophila melanogaster]
FBgn0004832	0.347051	0.0284784	0.275718	Xpac	xeroderma pigmentosum group A-like [Drosophila melanogaster]
FBgn0031435	-0.250931	0.028559	0.276228	Elba2	early boundary activity 2 [Drosophila melanogaster]
FBgn0037433	-0.326991	0.0285845	0.276228	CG17919	uncharacterized protein Dmel_CG17919 [Drosophila melanogaster]
FBgn0032014	-0.174928	0.0286688	0.276783	CG7840	--
FBgn0260004	-0.348638	0.0289197	0.278946	Snmp1	sensory neuron membrane protein 1, isoform B [Drosophila melanogaster]
FBgn0086558	-0.13695	0.0289942	0.279404	Ubi-p5E	polyubiquitin-C-like [Drosophila mauritiana]
FBgn0050273	0.376191	0.0291609	0.280629	CG30273	uncharacterized protein Dmel_CG30273 [Drosophila melanogaster]
FBgn0035877	0.27694	0.0291756	0.280629	CG7083	uncharacterized protein Dmel_CG7083 [Drosophila melanogaster]
FBgn0030766	-0.302337	0.0293149	0.281706	mthl1	methuselah-like 1, isoform B [Drosophila melanogaster]
FBgn0015622	-0.164702	0.0294133	0.282128	Cnx99A	calnexin 99A, isoform D [Drosophila melanogaster]
FBgn0032805	0.33014	0.0294134	0.282128	CG10337	uncharacterized protein Dmel_CG10337 [Drosophila melanogaster]
FBgn0259834	-0.187257	0.02952	0.282773	out	outsiders, isoform B [Drosophila melanogaster]
FBgn0010812	-0.19013	0.0295353	0.282773	unc-45	uncoordinated 45, isoform B [Drosophila melanogaster]
FBgn0002521	0.232723	0.0296399	0.283407	pho	pleiohomeotic, isoform A [Drosophila melanogaster]
FBgn0036816	-0.172014	0.0296563	0.283407	Indy	I'm not dead yet, isoform B [Drosophila melanogaster]
FBgn0032138	-0.124077	0.0296867	0.283435	CG4364	--
FBgn0031414	0.419714	0.0297748	0.284014	eys	eyes shut, isoform F [Drosophila melanogaster]
FBgn0051665	0.382699	0.0298363	0.284339	wry	weary, isoform B [Drosophila melanogaster]
FBgn0263456	0.417011	0.0299187	0.284861	nwk	nervous wreck, isoform I [Drosophila melanogaster]
FBgn0031064	0.486213	0.0299936	0.285311	CG12531	uncharacterized protein Dmel_CG12531, isoform A [Drosophila melanogaster]
FBgn0037676	0.58419	0.0300875	0.285942	CG8861	uncharacterized protein Dmel_CG8861, isoform C [Drosophila melanogaster]
FBgn0021760	-0.179715	0.0302038	0.286784	chb	chromosome bows, isoform A [Drosophila melanogaster]
FBgn0031959	0.661266	0.0303312	0.287729	spz3	--
FBgn0004401	-0.168674	0.0305208	0.289262	Pep	protein on ecdysone puffs, isoform B [Drosophila melanogaster]
FBgn0052311	-0.168398	0.0306825	0.290133	zormin	zormin, isoform J [Drosophila melanogaster]
FBgn0033292	0.363305	0.0307228	0.290133	Cyp4ad1	Cyp4ad1, isoform A [Drosophila melanogaster]
FBgn0038460	0.507652	0.0307279	0.290133	CG18622	uncharacterized protein Dmel_CG18622, isoform B [Drosophila melanogaster]
FBgn0261800	-0.177898	0.0307461	0.290133	LanB1	LanB1, isoform A [Drosophila melanogaster]
FBgn0028948	0.75182	0.030753	0.290133	CG15253	uncharacterized protein Dmel_CG15253 [Drosophila melanogaster]
FBgn0019686	-0.145841	0.0307886	0.290204	lok	loki, isoform A [Drosophila melanogaster]
FBgn0000108	0.308501	0.0310145	0.292068	Appl	beta amyloid protein precursor-like, isoform B [Drosophila melanogaster]
FBgn0023479	-0.155917	0.0312005	0.293118	teq	tequila, isoform G [Drosophila melanogaster]
FBgn0260486	-0.199609	0.0312159	0.293118	Ziz	zizimin, isoform K [Drosophila melanogaster]
FBgn0265178	0.200621	0.0312387	0.293118	CG44243	uncharacterized protein Dmel_CG44243, isoform A [Drosophila melanogaster]
FBgn0001078	-0.204103	0.0312561	0.293118	ftz-f1	ftz transcription factor 1, isoform B [Drosophila melanogaster]
FBgn0259699	-0.211212	0.0312678	0.293118	CG42353	uncharacterized protein Dmel_CG42353, isoform B [Drosophila melanogaster]
FBgn0052681	-0.624275	0.0312998	0.293152	CG32681	uncharacterized protein Dmel_CG32681 [Drosophila melanogaster]
FBgn0262656	0.118709	0.0314343	0.294145	Myc	Myc, isoform B [Drosophila melanogaster]
FBgn0086446	0.327468	0.0315255	0.294255	DCTN6-p27	dynactin 6, p27 subunit [Drosophila melanogaster]
FBgn0033095	-0.220217	0.0315415	0.294255	chk	chaski, isoform B [Drosophila melanogaster]
FBgn0266525	-0.220217	0.0315415	0.294255	CG45092	uncharacterized protein Dmel_CG45092, isoform D [Drosophila melanogaster]
FBgn0035873	1.80418	0.0315599	0.294255	CG13670	uncharacterized protein Dmel_CG13670 [Drosophila melanogaster]
FBgn0029696	3.07759	0.0316569	0.294894	CG15571	MIP16731p, partial [Drosophila melanogaster]
FBgn0266491	0.758308	0.0317335	0.295341	SclA	***** No hits found *****
FBgn0032850	-0.396274	0.031854	0.296196	Kua	Kua, isoform B [Drosophila melanogaster]
FBgn0034837	3	0.0319286	1	RpL22-like	ribosomal protein L22-like [Drosophila melanogaster]
FBgn0000037	0.537522	0.0319516	0.296608	mAChR-A	muscarinic acetylcholine Receptor, A-type, isoform B [Drosophila melanogaster]
FBgn0037796	0.313841	0.0319562	0.296608	CG12814	uncharacterized protein Dmel_CG12814, isoform E [Drosophila melanogaster]
FBgn0284245	-0.14168	0.0319884	0.296608	eEF1alpha1	eukaryotic translation elongation factor 1 alpha 1, isoform D [Drosophila melanogaster]
FBgn0031118	-0.223711	0.032013	0.296608	RhoGAP19D	Rho GTPase activating protein at 19D, isoform D [Drosophila melanogaster]
FBgn0032699	-0.158037	0.0322232	0.298049	CG10383	uncharacterized protein Dmel_CG10383, isoform B [Drosophila melanogaster]
FBgn0261596	-0.142517	0.0322262	0.298049	RpS24	ribosomal protein S24 [Drosophila melanogaster]
FBgn0038415	-0.596867	0.0323157	0.29861	CG17929	uncharacterized protein Dmel_CG17929 [Drosophila melanogaster]
FBgn0004880	0.537657	0.0324874	0.299928	scrt	scratch, isoform B [Drosophila melanogaster]
FBgn0004828	0.16373	0.0327601	0.302176	His3.3B	histone H3.3 [Diachasma alloeum]
FBgn0034643	-0.210157	0.0329078	0.302587	CG10321	uncharacterized protein Dmel_CG10321, isoform B [Drosophila melanogaster]
FBgn0038221	-0.495919	0.0329375	0.302587	IFT54	intraflagellar transport 54 [Drosophila melanogaster]
FBgn0033304	-0.218637	0.0329508	0.302587	Cyp6a13	Cyp6a13 [Drosophila melanogaster]
FBgn0039637	-0.22746	0.032951	0.302587	Ctl2	choline transporter-like 2, isoform A [Drosophila melanogaster]
FBgn0265262	0.2633	0.0329905	0.302587	Vha68-1	vacuolar H[+] ATPase 68kD subunit 1, isoform B [Drosophila melanogaster]
FBgn0033873	0.414114	0.0330191	0.302587	CG6337	uncharacterized protein Dmel_CG6337, isoform B [Drosophila melanogaster]
FBgn0032223	-0.205531	0.0330729	0.302587	GATAd	--
FBgn0032456	-0.160227	0.033084	0.302587	MRP	--
FBgn0030343	-0.19287	0.033103	0.302587	ATP7	ATP7, isoform C [Drosophila melanogaster]
FBgn0039089	0.658532	0.0331297	0.302587	beat-IV	beaten path IV, isoform B [Drosophila melanogaster]
MSTRG.11609	0.410862	0.0331448	0.302587	Tf2-12	--
FBgn0267429	0.429118	0.0331558	0.302587	CG45782	uncharacterized protein Dmel_CG45782 [Drosophila melanogaster]
FBgn0036202	0.584963	0.0332127	0.302838	CG6024	uncharacterized protein Dmel_CG6024, isoform C [Drosophila melanogaster]
FBgn0267650	1.12286	0.033284	0.303222	pre-mod(mdg4)-AA	modifier of mdg4, isoform AA [Drosophila melanogaster]
FBgn0040964	-0.338496	0.0333273	0.303348	CG18661	uncharacterized protein Dmel_CG18661, isoform A [Drosophila melanogaster]
FBgn0261534	-0.469676	0.0333746	0.303438	l(2)34Fc	lethal (2) 34Fc, isoform B [Drosophila melanogaster]
FBgn0033434	0.233316	0.0333958	0.303438	CG1902	uncharacterized protein Dmel_CG1902, isoform A [Drosophila melanogaster]
FBgn0010247	0.215828	0.0334512	0.303675	Parp	Poly-(ADP-ribose) polymerase [Drosophila melanogaster]
FBgn0034199	-0.358247	0.0335197	0.303879	Gbp1	Growth-blocking peptide 1 [Drosophila melanogaster]
FBgn0038286	-0.163359	0.0335325	0.303879	CG6966	uncharacterized protein Dmel_CG6966, isoform B [Drosophila melanogaster]
FBgn0003507	-0.17251	0.0335635	0.303893	srp	serpent, isoform A [Drosophila melanogaster]
FBgn0085232	0.598373	0.0336105	0.304053	CG34203	IP17152p, partial [Drosophila melanogaster]
FBgn0031753	1.48938	0.0336466	0.304113	CG13999	--
FBgn0038595	-0.301104	0.0337554	0.304741	CG7142	uncharacterized protein Dmel_CG7142 [Drosophila melanogaster]
FBgn0016053	0.237467	0.033775	0.304741	pgc	polar granule component, isoform C [Drosophila melanogaster]
FBgn0038292	-0.144588	0.033853	0.304993	CG3987	uncharacterized protein Dmel_CG3987 [Drosophila melanogaster]
FBgn0037518	-0.335714	0.0338639	0.304993	CG2641	uncharacterized protein Dmel_CG2641 [Drosophila melanogaster]
FBgn0027578	-0.229473	0.0338914	0.304993	Nepl21	Neprilysin-like 21 [Drosophila melanogaster]
FBgn0033813	0.357604	0.0339661	0.305399	fsd	FI08524p, partial [Drosophila melanogaster]
FBgn0039696	-0.301313	0.0340247	0.305661	Rnb	R and B [Drosophila melanogaster]
FBgn0262357	-0.839387	0.0342652	0.307423	CG43055	uncharacterized protein Dmel_CG43055 [Drosophila melanogaster]
FBgn0003996	-1.51847	0.0343039	0.307423	w	white [Drosophila melanogaster]
FBgn0038160	0.426921	0.0343101	0.307423	CG9759	RH68384p, partial [Drosophila melanogaster]
FBgn0000500	0.53806	0.0343779	0.307594	Dsk	drosulfakinin [Drosophila melanogaster]
FBgn0037727	-0.382573	0.0343887	0.307594	Nepl12	Neprilysin-like 12 [Drosophila melanogaster]
FBgn0034731	0.703607	0.0344685	0.308042	CG10384	uncharacterized protein Dmel_CG10384, isoform E [Drosophila melanogaster]
FBgn0026756	-1	0.0345371	0.308388	Ugt37A1	UDP-glycosyltransferase family 37 member A1 [Drosophila melanogaster]
FBgn0031975	-0.272871	0.0347147	0.309707	Tg	--
FBgn0026199	0.244745	0.0347571	0.309818	myo	myoglianin, isoform A [Drosophila melanogaster]
FBgn0039026	-0.150018	0.0348975	0.310337	CG7029	uncharacterized protein Dmel_CG7029, isoform A [Drosophila melanogaster]
FBgn0033876	0.492844	0.0349289	0.310337	Syngr	synaptogyrin [Drosophila melanogaster]
FBgn0035666	0.656768	0.0349302	0.310337	Jon65Aii	jonah 65Aii [Drosophila melanogaster]
FBgn0034021	-0.201212	0.0349354	0.310337	CG8180	uncharacterized protein Dmel_CG8180, isoform B [Drosophila melanogaster]
FBgn0030559	1.40881	0.0350773	0.31133	CG13404	uncharacterized protein Dmel_CG13404 [Drosophila melanogaster]
FBgn0041004	0.26443	0.0352445	0.312546	CG17715	uncharacterized protein Dmel_CG17715, isoform D [Drosophila melanogaster]
FBgn0035726	-0.158061	0.0352876	0.312659	CG9953	uncharacterized protein Dmel_CG9953 [Drosophila melanogaster]
FBgn0265296	0.559696	0.0353457	0.312906	Dscam2	down syndrome cell adhesion molecule 2, isoform J [Drosophila melanogaster]
FBgn0053182	-0.250902	0.0354668	0.31371	Kdm4B	lysine (K)-specific demethylase 4B, isoform E [Drosophila melanogaster]
FBgn0037520	0.453646	0.0356152	0.314731	CG18268	uncharacterized protein Dmel_CG18268 [Drosophila melanogaster]
FBgn0085353	0.290082	0.0356555	0.314731	CG34324	uncharacterized protein Dmel_CG34324 [Drosophila melanogaster]
FBgn0052137	-0.211662	0.0357025	0.314731	CG32137	uncharacterized protein Dmel_CG32137, isoform B [Drosophila melanogaster]
FBgn0029629	-0.134242	0.035704	0.314731	eIF3g1	eukaryotic translation initiation factor 3 subunit g1 [Drosophila melanogaster]
FBgn0050339	-0.341109	0.0359072	0.316253	CG30339	uncharacterized protein Dmel_CG30339 [Drosophila melanogaster]
FBgn0039911	0.409473	0.0359959	0.316764	CG1909	uncharacterized protein Dmel_CG1909, isoform A [Drosophila melanogaster]
FBgn0039109	0.213893	0.0360763	0.317201	CG10365	uncharacterized protein Dmel_CG10365, isoform A [Drosophila melanogaster]
FBgn0035176	0.315782	0.0361534	0.317609	CG13905	uncharacterized protein Dmel_CG13905 [Drosophila melanogaster]
FBgn0261552	-0.224228	0.0363165	0.318698	ps	pasilla, isoform R [Drosophila melanogaster]
FBgn0031791	-0.369867	0.036339	0.318698	AANATL2	--
FBgn0261545	-0.249643	0.0364803	0.319666	CG42663	uncharacterized protein Dmel_CG42663, isoform B [Drosophila melanogaster]
FBgn0036997	0.724993	0.0365174	0.31972	CG5955	uncharacterized protein Dmel_CG5955 [Drosophila melanogaster]
FBgn0000719	-0.226383	0.0367472	0.32146	fog	folded gastrulation, isoform B [Drosophila melanogaster]
FBgn0020642	1.83218	0.0368004	0.321654	Lcp65Ac	Lcp65Ac [Drosophila melanogaster]
FBgn0032715	0.237571	0.0368321	0.321659	CG17597	uncharacterized protein Dmel_CG17597, isoform B [Drosophila melanogaster]
FBgn0010225	-0.136701	0.0370019	0.322635	Gel	RE15339p [Drosophila melanogaster]
FBgn0039311	0.251515	0.0370063	0.322635	CG10513	uncharacterized protein Dmel_CG10513 [Drosophila melanogaster]
FBgn0025360	0.688056	0.037126	0.323406	Optix	optix, isoform A [Drosophila melanogaster]
MSTRG.6760	0.338976	0.0371765	0.323542	GIP	--
FBgn0039050	0.329139	0.0372042	0.323542	CG17110	uncharacterized protein Dmel_CG17110, isoform B [Drosophila melanogaster]
FBgn0000038	0.446468	0.0373045	0.323555	nAChRbeta1	nicotinic acetylcholine receptor beta1, isoform A [Drosophila melanogaster]
FBgn0025686	-0.489805	0.0373201	0.323555	Amnionless	amnionless, isoform B [Drosophila melanogaster]
FBgn0040010	0.221835	0.0373443	0.323555	CG17493	uncharacterized protein Dmel_CG17493, isoform C [Drosophila melanogaster]
FBgn0085450	-0.254911	0.0373575	0.323555	Snoo	Sno oncogene, isoform B [Drosophila melanogaster]
FBgn0032614	-0.22362	0.0373719	0.323555	CG13284	--
FBgn0036948	0.364723	0.037396	0.323555	CG7298	LD26327p, partial [Drosophila melanogaster]
FBgn0259876	-0.256205	0.0374247	0.323555	Cap-G	chromosome associated protein G, isoform F [Drosophila melanogaster]
FBgn0038134	2.12928	0.037573	1	wntD	wnt inhibitor of dorsal [Drosophila melanogaster]
FBgn0052483	-0.394756	0.0376578	0.325145	CG32483	uncharacterized protein Dmel_CG32483 [Drosophila melanogaster]
FBgn0050105	0.346248	0.0377228	0.325145	CG30105	RE11282p, partial [Drosophila melanogaster]
FBgn0036271	0.258457	0.0377494	0.325145	Pbgs	porphobilinogen synthase, isoform B [Drosophila melanogaster]
FBgn0260747	-0.127256	0.0377574	0.325145	Chchd2	Coiled-coil-helix-coiled-coil-helix domain containing 2, isoform A [Drosophila melanogaster]
FBgn0043535	-0.285713	0.0377905	0.325145	Obp57a	Odorant-binding protein 57a [Drosophila melanogaster]
FBgn0003892	-0.35178	0.0377974	0.325145	ptc	patched [Drosophila melanogaster]
FBgn0053481	0.463898	0.037887	0.325646	dpr7	defective proboscis extension response 7, isoform F [Drosophila melanogaster]
FBgn0034542	0.221624	0.0381237	0.327408	Fem-1	Fem-1, isoform A [Drosophila melanogaster]
FBgn0036279	-0.163046	0.0383181	0.328589	Ncc69	sodium chloride cotransporter 69, isoform E [Drosophila melanogaster]
FBgn0038440	-0.548437	0.0383264	0.328589	Gr89a	gustatory receptor 89a [Drosophila melanogaster]
FBgn0040398	-0.138133	0.0383565	0.328589	CG14629	uncharacterized protein Dmel_CG14629 [Drosophila melanogaster]
FBgn0040388	-0.150523	0.0385734	0.329753	boi	brother of ihog, isoform G [Drosophila melanogaster]
FBgn0284229	-0.538518	0.0385803	0.329753	CG46313	***** No hits found *****
FBgn0003008	0.349657	0.0385882	0.329753	or	AP-3 complex subunit sigma-2 [Drosophila sechellia]
FBgn0035710	-0.21186	0.0386563	0.330063	SP1173	SP1173, isoform B [Drosophila melanogaster]
FBgn0039293	-0.232257	0.0387116	0.330262	Alg9	ALG9, alpha-1,2-mannosyltransferase [Drosophila melanogaster]
FBgn0267821	-0.170945	0.0387552	0.330362	da	daughterless, isoform B [Drosophila melanogaster]
FBgn0035603	0.266165	0.0387967	0.330443	Pfdn4	prefoldin 4 [Drosophila melanogaster]
FBgn0016926	-0.136501	0.0388659	0.33076	Pino	uncharacterized protein Dyak_GE15777, isoform A [Drosophila yakuba]
FBgn0013749	0.249144	0.0389211	0.330957	Arf102F	ADP ribosylation factor at 102F, isoform B [Drosophila melanogaster]
FBgn0039617	0.786719	0.0390752	0.331743	DIP-gamma	Dpr-interacting protein gamma [Drosophila melanogaster]
FBgn0036728	-0.156241	0.0390777	0.331743	UQCR-Q	Ubiquinol-cytochrome c reductase ubiquinone-binding protein, isoform B [Drosophila melanogaster]
FBgn0004607	-0.309392	0.0391207	0.331836	zfh2	Zn finger homeodomain 2, isoform A [Drosophila melanogaster]
FBgn0039537	0.199075	0.0392242	0.332441	CG5590	uncharacterized protein Dmel_CG5590 [Drosophila melanogaster]
FBgn0052750	0.299047	0.0393456	0.333197	CG32750	uncharacterized protein Dmel_CG32750 [Drosophila melanogaster]
FBgn0028717	0.290454	0.0393814	0.333227	Lnk	Lnk, isoform D [Drosophila melanogaster]
FBgn0261385	-0.191728	0.0394513	0.333546	scra	scraps, isoform B [Drosophila melanogaster]
FBgn0035186	-0.224807	0.0395109	0.333658	CG13912	uncharacterized protein Dmel_CG13912 [Drosophila melanogaster]
FBgn0259735	-0.205584	0.0395291	0.333658	mtgo	miles to go, isoform E [Drosophila melanogaster]
FBgn0038135	0.233114	0.0396707	0.33458	CG8773	uncharacterized protein Dmel_CG8773 [Drosophila melanogaster]
FBgn0259715	-0.15146	0.0398674	0.335965	CG42369	uncharacterized protein Dmel_CG42369 [Drosophila melanogaster]
FBgn0039495	0.498074	0.0400993	0.337644	CG5909	uncharacterized protein Dmel_CG5909 [Drosophila melanogaster]
FBgn0286508	-0.16825	0.0402254	0.33843	Had1	beta hydroxy acid dehydrogenase 1, isoform B [Drosophila melanogaster]
FBgn0034389	-0.244586	0.0402835	0.338644	Mctp	multiple C2 domain and transmembrane region protein, isoform E [Drosophila melanogaster]
FBgn0032615	-0.984636	0.0403891	0.339255	CG6012	--
FBgn0029765	-0.300872	0.0406299	0.341001	CG16756	uncharacterized protein Dmel_CG16756 [Drosophila melanogaster]
FBgn0030894	-0.200886	0.0407377	0.341488	Mvb12	multivesicular body subunit 12, isoform D [Drosophila melanogaster]
FBgn0010399	0.598259	0.040754	0.341488	Nmdar1	NMDA receptor 1 [Drosophila melanogaster]
FBgn0085452	-0.361418	0.0408262	0.341816	CG34423	uncharacterized protein Dmel_CG34423, isoform B [Drosophila melanogaster]
FBgn0030884	0.372868	0.0409268	0.342381	CG6847	uncharacterized protein Dmel_CG6847, isoform B [Drosophila melanogaster]
MSTRG.2305	-0.355297	0.0411212	0.342993	--	--
FBgn0000541	-0.205095	0.0411378	0.342993	E(bx)	enhancer of bithorax, isoform H [Drosophila melanogaster]
FBgn0037798	1.33106	0.0411683	0.342993	CG12817	uncharacterized protein Dmel_CG12817 [Drosophila melanogaster]
FBgn0024177	-0.234359	0.041177	0.342993	zpg	zero population growth, isoform B [Drosophila melanogaster]
FBgn0085404	-1.35819	0.0412028	0.342993	CG34375	uncharacterized protein Dmel_CG34375, isoform B [Drosophila melanogaster]
FBgn0020912	0.304393	0.0412103	0.342993	Ptx1	Ptx1, isoform C [Drosophila melanogaster]
FBgn0029835	-0.195316	0.0412321	0.342993	CG5921	uncharacterized protein Dmel_CG5921, isoform D [Drosophila melanogaster]
FBgn0052694	0.327914	0.0413882	0.343606	CG32694	uncharacterized protein Dmel_CG32694, isoform B [Drosophila melanogaster]
FBgn0263257	0.462035	0.041395	0.343606	Cngl	cyclic nucleotide-gated ion channel-like, isoform E [Drosophila melanogaster]
FBgn0259236	-0.304243	0.041431	0.343606	comm3	comm3, isoform E [Drosophila melanogaster]
FBgn0267651	0.797662	0.0414387	0.343606	pre-mod(mdg4)-O	modifier of mdg4, isoform O [Drosophila melanogaster]
FBgn0264492	0.236648	0.0414792	0.343666	CkIIalpha	PREDICTED: casein kinase II subunit alpha isoform X1 [Drosophila biarmipes]
FBgn0020270	-0.238193	0.0415129	0.34367	mre11	meiotic recombination 11 [Drosophila melanogaster]
FBgn0037135	-0.115103	0.0416983	0.344928	CG7414	uncharacterized protein Dmel_CG7414, isoform D [Drosophila melanogaster]
FBgn0037230	-0.178055	0.0418537	0.345937	Nepl11	Neprilysin-like 11 [Drosophila melanogaster]
FBgn0035041	0.789867	0.0420785	0.347345	CG13594	uncharacterized protein Dmel_CG13594, isoform B [Drosophila melanogaster]
FBgn0001228	-0.674173	0.0420912	0.347345	CG4456	uncharacterized protein Dmel_CG4456, isoform B [Drosophila melanogaster]
FBgn0044510	0.218797	0.0421422	0.347488	mRpS5	mitochondrial ribosomal protein S5, isoform C [Drosophila melanogaster]
MSTRG.2126	0.460246	0.0422092	0.347573	--	--
FBgn0010238	-0.164887	0.0422197	0.347573	Lac	lachesin [Drosophila melanogaster]
FBgn0015926	-0.172787	0.0424188	0.348934	dah	discontinuous actin hexagon, isoform A [Drosophila melanogaster]
FBgn0038414	-0.557764	0.0424637	0.349026	CG6901	MIP24784p, partial [Drosophila melanogaster]
FBgn0000042	-0.12895	0.0425054	0.349091	Act5C	hypothetical protein DOY81_000649, partial [Sarcophaga bullata]
FBgn0036046	0.605721	0.0426014	0.349602	Ilp2	Insulin-like peptide 2 [Drosophila melanogaster]
FBgn0039709	0.298762	0.0429175	0.351655	Cad99C	cadherin 99C, isoform B [Drosophila melanogaster]
FBgn0010877	-0.112295	0.0429195	0.351655	l(3)05822	lethal (3) 05822, isoform C [Drosophila melanogaster]
FBgn0286932	-0.193217	0.042962	0.351724	CG46429	GD11790 [Drosophila simulans]
FBgn0011227	-0.272683	0.0431064	0.352627	ox	oxen [Drosophila melanogaster]
FBgn0027287	-0.140703	0.0432182	0.353262	Gmap	golgi microtubule-associated protein, isoform D [Drosophila melanogaster]
FBgn0032120	-0.166948	0.0432709	0.353323	CG33298	--
FBgn0250839	0.541469	0.0432941	0.353323	CG2016	uncharacterized protein Dmel_CG2016, isoform E [Drosophila melanogaster]
FBgn0051089	-1.558	0.0433321	0.353355	CG31089	uncharacterized protein Dmel_CG31089 [Drosophila melanogaster]
FBgn0038923	0.252942	0.0434365	0.353927	mRpL35	mitochondrial ribosomal protein L35 [Drosophila melanogaster]
FBgn0031298	-0.165424	0.0434709	0.353929	Atg4a	Autophagy-related 4a, isoform A [Drosophila melanogaster]
FBgn0034742	0.282825	0.0435308	0.354137	CG4294	uncharacterized protein Dmel_CG4294, isoform B [Drosophila melanogaster]
FBgn0036668	-0.260873	0.0435987	0.354411	Zcchc7	zinc finger CCHC-type containing 7 [Drosophila melanogaster]
FBgn0261053	-0.373368	0.0439247	0.356781	Cad86C	cadherin 86C, isoform F [Drosophila melanogaster]
FBgn0259174	-0.115056	0.044166	0.358459	Nedd4	Nedd4, isoform J [Drosophila melanogaster]
MSTRG.10766	-0.444756	0.0442528	0.358708	--	--
FBgn0032731	-0.170551	0.044266	0.358708	Swip-1	Swiprosin-1, isoform B [Drosophila melanogaster]
FBgn0284228	-0.245414	0.0443403	0.359028	CG46312	uncharacterized protein Dmel_CG46312 [Drosophila melanogaster]
FBgn0035023	0.212594	0.0444251	0.359179	ITP	PREDICTED: ion transport peptide-like isoform X1 [Drosophila elegans]
FBgn0024963	0.315074	0.0444815	0.359179	GluClalpha	GluClalpha, isoform N [Drosophila melanogaster]
FBgn0034288	-1.71049	0.0444862	0.359179	CG5084	uncharacterized protein Dmel_CG5084, isoform B [Drosophila melanogaster]
FBgn0261848	0.436191	0.0444979	0.359179	CG42780	uncharacterized protein Dmel_CG42780, isoform B [Drosophila melanogaster]
FBgn0035849	0.280473	0.0445337	0.359187	ERR	estrogen-related receptor, isoform B [Drosophila melanogaster]
FBgn0038957	-0.622736	0.0446078	0.359505	CG7059	uncharacterized protein Dmel_CG7059, isoform A [Drosophila melanogaster]
FBgn0002940	0.219436	0.0446756	0.359771	ninaE	neither inactivation nor afterpotential E [Drosophila melanogaster]
FBgn0038966	-0.223438	0.0448038	0.360522	pinta	prolonged depolarization afterpotential (PDA) is not apparent, isoform B [Drosophila melanogaster]
FBgn0034049	-0.197619	0.0448514	0.360625	bdg	bedraggled, isoform A [Drosophila melanogaster]
FBgn0035359	0.370563	0.0449976	0.361519	CG1143	uncharacterized protein Dmel_CG1143, isoform B [Drosophila melanogaster]
FBgn0034740	2.96963	0.0450314	1	nsr	novel spermatogenesis regulator, isoform B [Drosophila melanogaster]
FBgn0032789	1.27215	0.0451474	0.362191	CG13083	IP19511p, partial [Drosophila melanogaster]
FBgn0085360	-0.265928	0.0451512	0.362191	CG34331	uncharacterized protein Dmel_CG34331, isoform C [Drosophila melanogaster]
FBgn0013733	-0.0940746	0.0454463	0.364275	shot	short stop, isoform H [Drosophila melanogaster]
FBgn0003502	-0.172999	0.0455094	0.364498	Btk29A	Btk family kinase at 29A, isoform E [Drosophila melanogaster]
FBgn0001404	-0.132752	0.0455693	0.364695	egh	egghead, isoform D [Drosophila melanogaster]
FBgn0038002	0.560203	0.0456462	0.365029	CG12256	uncharacterized protein Dmel_CG12256 [Drosophila melanogaster]
FBgn0032422	-0.220665	0.0457018	0.365141	atilla	--
FBgn0263111	0.405095	0.0457309	0.365141	cac	cacophony, isoform N [Drosophila melanogaster]
FBgn0037330	0.259281	0.0458499	0.365809	mRpL44	LD10028p, partial [Drosophila melanogaster]
FBgn0004666	0.39486	0.0458872	0.365824	sim	single-minded, isoform A [Drosophila melanogaster]
FBgn0015766	-0.114379	0.0460009	0.366448	Msr-110	Msr-110, isoform C [Drosophila melanogaster]
FBgn0266758	-0.170355	0.0462829	0.36841	Esyt2	extended synaptotagmin-like protein 2, isoform C [Drosophila melanogaster]
FBgn0004428	-0.237801	0.0463939	0.36901	LysE	lysozyme E [Drosophila melanogaster]
FBgn0050083	-1.81359	0.046495	0.36953	CG30083	uncharacterized protein Dmel_CG30083 [Drosophila melanogaster]
FBgn0030005	0.58674	0.0466347	0.370355	CG2120	uncharacterized protein Dmel_CG2120 [Drosophila melanogaster]
FBgn0261270	0.197561	0.0466951	0.37055	SelD	Selenide,water dikinase, isoform A [Drosophila melanogaster]
FBgn0261986	-0.148198	0.0468705	0.371547	RASSF8	Ras association domain family member 8 [Drosophila melanogaster]
FBgn0086855	-0.206905	0.0469468	0.371547	CG17078	uncharacterized protein Dmel_CG17078, isoform E [Drosophila melanogaster]
FBgn0037633	-0.252766	0.0469692	0.371547	CG9839	uncharacterized protein Dmel_CG9839, isoform B [Drosophila melanogaster]
FBgn0031275	0.794886	0.0469908	0.371547	GABA-B-R3	metabotropic GABA-B receptor subtype 3, isoform D [Drosophila melanogaster]
MSTRG.10293	0.857981	0.0470004	0.371547	--	--
FBgn0025885	0.184831	0.0471714	0.372614	Inos	myo-inositol-1-phosphate synthase [Drosophila melanogaster]
FBgn0027581	-0.16934	0.0472248	0.372751	CG6191	uncharacterized protein Dmel_CG6191, isoform B [Drosophila melanogaster]
FBgn0031632	0.219903	0.0472723	0.372842	CG15628	uncharacterized protein Dmel_CG15628, isoform B [Drosophila melanogaster]
FBgn0036896	-0.194789	0.0473653	0.373291	wnd	wallenda, isoform A [Drosophila melanogaster]
FBgn0016794	-0.142755	0.0474484	0.373661	dos	daughter of sevenless, isoform A [Drosophila melanogaster]
FBgn0036411	0.76517	0.0476391	0.374877	Sox21a	Sox21a, isoform A [Drosophila melanogaster]
FBgn0015591	0.328672	0.0476837	0.374943	AstA	allatostatin A, isoform B [Drosophila melanogaster]
FBgn0265191	-0.135988	0.0478282	0.37577	Gyg	glycogenin, isoform E [Drosophila melanogaster]
FBgn0050096	0.393006	0.0478616	0.37577	CG30096	uncharacterized protein Dmel_CG30096 [Drosophila melanogaster]
FBgn0031560	-0.305071	0.0481365	0.377487	CG16713	uncharacterized protein Dmel_CG16713 [Drosophila melanogaster]
FBgn0031533	-0.320907	0.0481689	0.377487	CG2772	uncharacterized protein Dmel_CG2772 [Drosophila melanogaster]
FBgn0038198	-0.208332	0.0481898	0.377487	Npc2b	Niemann-Pick type C-2b, isoform B [Drosophila melanogaster]
FBgn0024806	-0.177442	0.0482549	0.377557	DIP2	DISCO interacting protein 2, isoform A [Drosophila melanogaster]
FBgn0052656	0.235794	0.0483032	0.377557	Muc11A	mucin 11A [Drosophila melanogaster]
FBgn0030057	-0.260359	0.0483083	0.377557	Ppt1	Palmitoyl-protein thioesterase 1, isoform B [Drosophila melanogaster]
FBgn0052984	-0.31295	0.04839	0.37791	CG32984	uncharacterized protein Dmel_CG32984 [Drosophila melanogaster]
FBgn0085453	-0.231125	0.0487206	0.379759	Mthfs	methenyltetrahydrofolate synthetase, isoform A [Drosophila melanogaster]
FBgn0000277	-2.10102	0.0487288	0.379759	CecA2	cecropin A1 [Drosophila melanogaster]
FBgn0032512	0.268926	0.048737	0.379759	Bdp1	--
FBgn0033792	-0.387116	0.0488726	0.380529	CG13325	uncharacterized protein Dmel_CG13325, isoform B [Drosophila melanogaster]
FBgn0037894	-0.188934	0.04896	0.380832	Ranbp9	Ranbp9, isoform D [Drosophila melanogaster]
FBgn0033520	-0.244991	0.0489852	0.380832	Prx2540-1	peroxiredoxin 2540-1 [Drosophila melanogaster]
FBgn0037556	-0.182494	0.0494899	0.38418	CG9636	uncharacterized protein Dmel_CG9636, isoform C [Drosophila melanogaster]
FBgn0000395	-0.260315	0.0494901	0.38418	cv-2	crossveinless 2 [Drosophila melanogaster]
FBgn0028663	0.200236	0.0495591	0.384427	VhaM9.7-b	vacuolar H[+] ATPase M9.7 subunit b, isoform B [Drosophila melanogaster]
FBgn0000427	1.47531	0.0496462	0.384814	2021-12-01	defective chorion 1, isoform A [Drosophila melanogaster]
FBgn0026737	0.256789	0.0497177	0.385079	CG6171	uncharacterized protein Dmel_CG6171, isoform B [Drosophila melanogaster]
FBgn0013953	-0.219766	0.0497589	0.38511	Esp	epidermal stripes and patches, isoform B [Drosophila melanogaster]
FBgn0003710	0.667763	0.0498521	0.385472	tipE	temperature-induced paralytic E, isoform A [Drosophila melanogaster]
FBgn0264357	-0.132846	0.0498803	0.385472	SNF4Agamma	SNF4/AMP-activated protein kinase gamma subunit, isoform R [Drosophila melanogaster]
FBgn0052409	0.216394	0.0499453	0.385687	CG32409	LD45683p, partial [Drosophila melanogaster]
FBgn0011822	0.254106	0.0500081	0.385699	Pgcl	pepsinogen C-like [Drosophila melanogaster]
FBgn0041604	-0.226907	0.0500381	0.385699	dlp	dally-like, isoform A [Drosophila melanogaster]
FBgn0035978	-0.12884	0.0500588	0.385699	UGP	GD12937 [Drosophila simulans]
FBgn0004066	0.207196	0.0501021	0.385745	Prosalpha4	proteasome alpha4 subunit [Drosophila melanogaster]
FBgn0050476	0.342401	0.050186	0.386103	ave	aveugle [Drosophila melanogaster]
FBgn0039259	0.30757	0.0502386	0.386211	CG11781	uncharacterized protein Dmel_CG11781 [Drosophila melanogaster]
FBgn0032078	0.242935	0.0502746	0.386211	C1GalTA	--
FBgn0265630	-0.207879	0.0504334	0.38693	sno	strawberry notch, isoform B [Drosophila melanogaster]
FBgn0029006	-0.204093	0.0504431	0.38693	Smurf	SMAD specific E3 ubiquitin protein ligase, isoform B [Drosophila melanogaster]
FBgn0029685	-0.163489	0.0506351	0.387953	CG2938	uncharacterized protein Dmel_CG2938, isoform C [Drosophila melanogaster]
FBgn0039475	-0.483248	0.0506515	0.387953	CG6277	uncharacterized protein Dmel_CG6277 [Drosophila melanogaster]
FBgn0029941	-0.190969	0.0507536	0.388447	CG1677	hypothetical protein [Drosophila melanogaster]
FBgn0032008	0.520742	0.0508522	0.388666	CG14277	--
FBgn0283545	-1.09668	0.0508648	0.388666	vilya	vilya [Drosophila melanogaster]
FBgn0036877	0.546906	0.0508949	0.388666	CG9452	uncharacterized protein Dmel_CG9452 [Drosophila melanogaster]
FBgn0260450	-0.225685	0.0509873	0.389084	CalpC	calpain C [Drosophila melanogaster]
FBgn0034249	-0.275672	0.0510523	0.389098	RhoGAP54D	Rho GTPase activating protein at 54D, isoform C [Drosophila melanogaster]
FBgn0036775	0.233393	0.0510645	0.389098	RpIIIC53	RNA polymerase III subunit C53 [Drosophila melanogaster]
FBgn0035501	-0.261228	0.0514758	0.391944	CG1299	uncharacterized protein Dmel_CG1299, isoform A [Drosophila melanogaster]
FBgn0051163	-0.200574	0.0515217	0.392004	SKIP	shal K[+] channel interacting protein, isoform E [Drosophila melanogaster]
FBgn0031514	-0.230089	0.0515922	0.392079	OtopLb	Otopetrin-like b, isoform A [Drosophila melanogaster]
FBgn0039776	0.249766	0.0516375	0.392079	PH4alphaEFB	prolyl-4-hydroxylase-alpha EFB [Drosophila melanogaster]
FBgn0039085	-0.217446	0.0516739	0.392079	Ugt303B3	UDP-glycosyltransferase family 303 member B3 [Drosophila melanogaster]
FBgn0032068	-0.267546	0.0516831	0.392079	LManV	--
FBgn0051642	0.876068	0.0517753	0.39249	CG31642	FI22112p1, partial [Drosophila melanogaster]
FBgn0032187	-0.13045	0.0518623	0.392861	CG4839	--
FBgn0032752	-0.23935	0.0519208	0.392869	CG10702	uncharacterized protein Dmel_CG10702, isoform D [Drosophila melanogaster]
FBgn0036574	-0.235488	0.0519395	0.392869	elg1	enhanced level of genomic instability 1, isoform C [Drosophila melanogaster]
FBgn0032400	-0.151221	0.0519773	0.392869	CG6770	--
FBgn0015036	-0.325352	0.0520771	0.393336	Cyp4ae1	cytochrome P450-4ae1 [Drosophila melanogaster]
FBgn0050502	-0.253262	0.0521471	0.393577	fa2h	fatty acid 2-hydroylase [Drosophila melanogaster]
FBgn0040237	0.21238	0.0522589	0.393812	bor	belphegor, isoform B [Drosophila melanogaster]
FBgn0266174	0.588715	0.0522883	0.393812	pre-mod(mdg4)-L	modifier of mdg4, isoform L [Drosophila melanogaster]
FBgn0263072	0.601738	0.0523283	0.393812	CG43347	uncharacterized protein Dmel_CG43347, isoform C [Drosophila melanogaster]
FBgn0263232	-0.226072	0.0523305	0.393812	Nxf3	nuclear export factor 3, isoform C [Drosophila melanogaster]
FBgn0038246	0.320463	0.0525458	0.39501	CG14853	uncharacterized protein Dmel_CG14853, isoform C [Drosophila melanogaster]
FBgn0044324	-0.173386	0.0525661	0.39501	Chro	chromator, isoform D [Drosophila melanogaster]
FBgn0050052	0.490017	0.0526417	0.395176	Obp49a	Odorant-binding protein 49a [Drosophila melanogaster]
FBgn0034215	-0.149167	0.0526646	0.395176	Mtap	methylthioadenosine phosphorylase, isoform C [Drosophila melanogaster]
FBgn0264542	0.482393	0.0527213	0.395226	hwt	heavyweight, isoform A [Drosophila melanogaster]
FBgn0053109	0.243969	0.0527478	0.395226	CG33109	uncharacterized protein Dmel_CG33109 [Drosophila melanogaster]
FBgn0000303	0.544032	0.0531434	0.397774	ChAT	choline acetyltransferase, isoform A [Drosophila melanogaster]
FBgn0004885	-0.199973	0.0531888	0.397774	tok	tolkin, isoform C [Drosophila melanogaster]
FBgn0085478	-0.284681	0.0532032	0.397774	Zdhhc8	uncharacterized protein Dmel_CG34449, isoform A [Drosophila melanogaster]
FBgn0035266	-0.163797	0.053352	0.398369	Gk2	glycerol kinase 2, isoform F [Drosophila melanogaster]
FBgn0004419	0.202295	0.0533599	0.398369	me31B	maternal expression at 31B, isoform A [Drosophila melanogaster]
MSTRG.5669	-2.00856	0.0534387	1	--	--
FBgn0036827	0.231467	0.0534834	0.399003	CG6843	IP14752p, partial [Drosophila melanogaster]
FBgn0013672	0.276596	0.0535448	0.399173	mt:ATPase6	--
FBgn0261985	-0.131741	0.053743	0.400215	Ptpmeg	protein tyrosine phosphatase Meg, isoform I [Drosophila melanogaster]
FBgn0040271	-0.208674	0.0537619	0.400215	Sulf1	sulfated, isoform B [Drosophila melanogaster]
FBgn0034959	0.40024	0.053934	0.401029	Xxylt	xyloside xylosyltransferase [Drosophila melanogaster]
FBgn0038147	-0.206163	0.0539676	0.401029	CCHa2	CCHamide-2, isoform B [Drosophila melanogaster]
FBgn0051269	0.722539	0.0539877	0.401029	CG31269	uncharacterized protein Dmel_CG31269 [Drosophila melanogaster]
FBgn0050295	-0.196835	0.054027	0.401033	Ipk1	Ipk1, isoform B [Drosophila melanogaster]
FBgn0035941	0.455478	0.0541071	0.40134	CG13313	uncharacterized protein Dmel_CG13313 [Drosophila melanogaster]
FBgn0011556	0.271235	0.0545886	0.404563	zetaTry	zetaTrypsin [Drosophila melanogaster]
FBgn0000017	-0.230209	0.0546199	0.404563	Abl	Abl tyrosine kinase, isoform F [Drosophila melanogaster]
FBgn0039015	0.448513	0.0548121	0.405535	Takl2	Tak1-like 2 [Drosophila melanogaster]
FBgn0025628	0.212317	0.0548296	0.405535	CG4199	uncharacterized protein Dmel_CG4199, isoform I [Drosophila melanogaster]
FBgn0025827	-0.369263	0.0551681	0.407747	CG6421	FI09201p, partial [Drosophila melanogaster]
FBgn0261722	0.173646	0.0552911	0.408128	fwe	flower, isoform A [Drosophila melanogaster]
FBgn0024361	0.201835	0.0552986	0.408128	Tsp2A	tetraspanin 2A, isoform B [Drosophila melanogaster]
FBgn0052708	0.321147	0.0553824	0.408455	CG32708	IP08630p1, partial [Drosophila melanogaster]
FBgn0036837	-0.121449	0.0554698	0.408516	CG18135	uncharacterized protein Dmel_CG18135, isoform D [Drosophila melanogaster]
FBgn0003733	-0.232187	0.0554844	0.408516	tor	torso, isoform A [Drosophila melanogaster]
FBgn0031373	-0.306689	0.0555092	0.408516	CG15358	uncharacterized protein Dmel_CG15358, isoform E [Drosophila melanogaster]
FBgn0042092	0.236593	0.0556327	0.409133	CG13773	uncharacterized protein Dmel_CG13773 [Drosophila melanogaster]
FBgn0046687	-0.201071	0.0557823	0.409942	Tre1	trapped in endoderm 1, isoform C [Drosophila melanogaster]
FBgn0050503	-0.234136	0.0559905	0.411098	CG30503	uncharacterized protein Dmel_CG30503, isoform B [Drosophila melanogaster]
FBgn0052564	1.38642	0.0560191	0.411098	CG32564	uncharacterized protein Dsimw501_GD17335 [Drosophila simulans]
FBgn0261041	0.4397	0.0561438	0.411721	stj	straightjacket, isoform C [Drosophila melanogaster]
FBgn0039429	3.62449	0.0563639	1	CG14238	uncharacterized protein Dmel_CG14238 [Drosophila melanogaster]
FBgn0036814	-0.204769	0.0564807	0.413573	CG14073	uncharacterized protein Dmel_CG14073, isoform C [Drosophila melanogaster]
FBgn0037100	0.402644	0.0565216	0.413573	CapaR	capability receptor, isoform B [Drosophila melanogaster]
FBgn0051956	0.281113	0.0565539	0.413573	Pgant4	UDP-GalNAc:polypeptide N-acetylgalactosaminyltransferase [Drosophila melanogaster]
FBgn0004435	0.241446	0.056562	0.413573	Galphaq	G protein alpha q subunit, isoform J [Drosophila melanogaster]
FBgn0034782	1.20704	0.0565962	0.413573	CG12490	uncharacterized protein Dmel_CG12490 [Drosophila melanogaster]
FBgn0002576	0.916477	0.0566671	0.413798	lz	lozenge, isoform A [Drosophila melanogaster]
FBgn0023178	0.33033	0.0569852	0.415827	Pdf	Pigment-dispersing factor [Drosophila melanogaster]
FBgn0032415	0.854661	0.0571915	0.417038	rho-6	--
FBgn0035983	-0.198759	0.0572616	0.417078	CG4080	uncharacterized protein Dmel_CG4080, isoform B [Drosophila melanogaster]
FBgn0039492	-0.171608	0.0572855	0.417078	CG6051	uncharacterized protein Dmel_CG6051, isoform B [Drosophila melanogaster]
FBgn0260965	0.293966	0.0573265	0.417078	CG42588	uncharacterized protein Dmel_CG42588, isoform A [Drosophila melanogaster]
FBgn0032231	0.242253	0.0573832	0.417078	CG5056	--
FBgn0058178	0.243172	0.0574062	0.417078	CG40178	uncharacterized protein Dmel_CG40178, isoform A [Drosophila melanogaster]
FBgn0030574	0.251144	0.0574925	0.417078	sbm	sobremesa, isoform B [Drosophila melanogaster]
FBgn0029525	-0.17455	0.0575319	0.417078	CG18273	uncharacterized protein Dmel_CG18273 [Drosophila melanogaster]
FBgn0041789	-0.0945461	0.0575597	0.417078	Pax	paxillin, isoform K [Drosophila melanogaster]
FBgn0267488	-0.154332	0.0575946	0.417078	Mcr	macroglobulin complement-related [Drosophila melanogaster]
FBgn0028482	-0.201321	0.0576003	0.417078	bdl	borderless [Drosophila melanogaster]
FBgn0050042	-0.232952	0.0576577	0.417202	Cpr49Ab	cuticular protein 49Ab [Drosophila melanogaster]
FBgn0036931	1.08489	0.0577605	0.417502	CG14183	uncharacterized protein Dmel_CG14183 [Drosophila melanogaster]
FBgn0035725	0.362686	0.05778	0.417502	Mis12	Mis12 [Drosophila melanogaster]
FBgn0034198	-0.184973	0.0578686	0.41785	CG11400	uncharacterized protein Dmel_CG11400, isoform B [Drosophila melanogaster]
FBgn0053144	-0.182159	0.0579981	0.418122	CG33144	uncharacterized protein Dmel_CG33144, isoform B [Drosophila melanogaster]
FBgn0263083	-0.643159	0.0580163	0.418122	CG43351	uncharacterized protein Dmel_CG43351 [Drosophila melanogaster]
FBgn0004872	-0.162794	0.0580276	0.418122	piwi	FI04411p, partial [Drosophila melanogaster]
FBgn0000308	0.162273	0.0581177	0.41848	chic	chickadee, isoform E [Drosophila melanogaster]
FBgn0016917	-0.117804	0.0582208	0.418656	Stat92E	Signal-transducer and activator of transcription protein at 92E, isoform K [Drosophila melanogaster]
FBgn0036278	0.358013	0.0582231	0.418656	CrzR	corazonin receptor, isoform B [Drosophila melanogaster]
FBgn0036254	0.253319	0.0583097	0.418724	CG5645	uncharacterized protein Dmel_CG5645 [Drosophila melanogaster]
FBgn0034237	-0.143606	0.0583135	0.418724	eIF3b	eukaryotic translation initiation factor 3 subunit b, isoform B [Drosophila melanogaster]
FBgn0260753	-0.322551	0.0586257	0.420673	Pdfr	Pigment-dispersing factor receptor, isoform B [Drosophila melanogaster]
FBgn0259482	0.236295	0.0588758	0.421898	Mob3	MOB kinase activator 3 [Drosophila melanogaster]
FBgn0051233	0.206536	0.0588892	0.421898	CG31233	uncharacterized protein Dmel_CG31233, isoform B [Drosophila melanogaster]
FBgn0046706	0.242794	0.0589188	0.421898	Haspin	haspin [Drosophila melanogaster]
FBgn0032198	0.180259	0.059062	0.421912	eEF1delta	--
FBgn0050479	-0.218248	0.0590682	0.421912	CG30479	uncharacterized protein Dmel_CG30479, isoform B [Drosophila melanogaster]
FBgn0260632	-0.187237	0.0590732	0.421912	dl	dorsal, isoform F [Drosophila melanogaster]
FBgn0063485	-0.209994	0.0590839	0.421912	Lasp	lasp, isoform B [Drosophila melanogaster]
FBgn0266369	-0.184178	0.0592828	0.423039	Mtp	microsomal triacylglycerol transfer protein [Drosophila melanogaster]
FBgn0038011	1.54916	0.0594019	0.423597	CG4066	uncharacterized protein Dmel_CG4066 [Drosophila melanogaster]
FBgn0035915	2.87447	0.0596546	1	S-Lap1	Sperm-Leucylaminopeptidase 1 [Drosophila melanogaster]
FBgn0038145	-0.118754	0.0599464	0.427107	Droj2	DnaJ-like-2, isoform A [Drosophila melanogaster]
FBgn0052944	0.814968	0.0599768	0.427107	CG32944	uncharacterized protein Dmel_CG32944, isoform F [Drosophila melanogaster]
FBgn0031321	0.279822	0.0600534	0.427359	Tgt	tRNA-guanine transglycosylase [Drosophila melanogaster]
FBgn0011224	-0.213012	0.0601602	0.427571	heph	hephaestus, isoform Y [Drosophila melanogaster]
FBgn0050046	-0.291691	0.0601673	0.427571	CG30046	uncharacterized protein Dmel_CG30046, isoform C [Drosophila melanogaster]
FBgn0283659	0.378674	0.0602142	0.427571	THG	tRNA-histidine guanylyltransferase, isoform B [Drosophila melanogaster]
FBgn0016672	0.276524	0.0602487	0.427571	Ipp	inositol polyphosphate 1-phosphatase [Drosophila melanogaster]
FBgn0035763	-0.139753	0.0602995	0.427638	mrva	uncharacterized protein Dmel_CG8602, isoform B [Drosophila melanogaster]
FBgn0031374	-0.148565	0.0604952	0.428732	Wdr62	WD repeat domain 62, isoform G [Drosophila melanogaster]
FBgn0040778	0.51543	0.0606664	0.429651	CG17977	uncharacterized protein Dmel_CG17977 [Drosophila melanogaster]
FBgn0033540	0.250331	0.0608392	0.43058	Elp2	elongator complex protein 2 [Drosophila melanogaster]
FBgn0039736	-0.353954	0.0610191	0.430885	CG7912	uncharacterized protein Dmel_CG7912 [Drosophila melanogaster]
FBgn0024179	-0.218278	0.061025	0.430885	wit	wishful thinking, isoform B [Drosophila melanogaster]
FBgn0024352	-0.104324	0.0610304	0.430885	Stip1	stress induced phosphoprotein 1 [Drosophila melanogaster]
FBgn0266172	1.08659	0.061049	0.430885	pre-mod(mdg4)-E	modifier of mdg4, isoform E [Drosophila melanogaster]
FBgn0028970	0.278209	0.0612134	0.431751	betaggt-II	beta subunit of type II geranylgeranyl transferase [Drosophila melanogaster]
FBgn0034936	0.200906	0.0613793	0.432594	Stoml2	stomatin like 2, isoform B [Drosophila melanogaster]
FBgn0030630	-0.179748	0.0614166	0.432594	CG12608	uncharacterized protein Dmel_CG12608 [Drosophila melanogaster]
FBgn0051523	-0.131132	0.0614657	0.432645	CG31523	uncharacterized protein Dmel_CG31523, isoform E [Drosophila melanogaster]
FBgn0031836	-0.121139	0.0615082	0.432649	CG11050	--
FBgn0035781	0.246691	0.0616489	0.433344	CG8560	uncharacterized protein Dmel_CG8560, isoform B [Drosophila melanogaster]
FBgn0051104	-0.311377	0.0617916	0.434052	CG31104	uncharacterized protein Dmel_CG31104 [Drosophila melanogaster]
FBgn0002121	-0.110532	0.0619401	0.4348	l(2)gl	lethal (2) giant larvae, isoform G [Drosophila melanogaster]
FBgn0052195	0.258378	0.0620228	0.435086	CG32195	uncharacterized protein Dmel_CG32195, isoform B [Drosophila melanogaster]
FBgn0083968	0.23407	0.0622824	0.43661	CG34132	uncharacterized protein Dmel_CG34132 [Drosophila melanogaster]
FBgn0259685	-0.151403	0.0623764	0.436973	crb	crumbs, isoform C [Drosophila melanogaster]
FBgn0036745	0.282525	0.0626826	0.438818	CG7484	uncharacterized protein Dmel_CG7484 [Drosophila melanogaster]
FBgn0033205	0.266525	0.0627246	0.438818	CG2064	FI07747p, partial [Drosophila melanogaster]
FBgn0030834	0.236088	0.0629792	0.440301	CG8675	uncharacterized protein Dsimw501_GD15685 [Drosophila simulans]
FBgn0004782	1.72031	0.0630413	1	Ccp84Ab	Ccp84Ab [Drosophila melanogaster]
FBgn0035811	-0.106134	0.0630771	0.440479	Mcad	Medium-chain acyl-CoA dehydrogenase [Drosophila melanogaster]
FBgn0010409	-0.129097	0.0631267	0.440479	RpL18A	ribosomal protein L18A [Drosophila melanogaster]
FBgn0035999	-0.208812	0.0631325	0.440479	CG3552	uncharacterized protein Dmel_CG3552, isoform D [Drosophila melanogaster]
FBgn0031907	-0.171647	0.0634779	0.442591	CG5171	--
FBgn0032330	-0.230236	0.0636027	0.443162	Samuel	--
FBgn0043457	0.378783	0.0637394	0.443815	CG5180	uncharacterized protein Dmel_CG5180, isoform B [Drosophila melanogaster]
FBgn0000463	-0.336397	0.0637896	0.443866	Dl	delta protein [Drosophila melanogaster]
FBgn0025455	-0.249992	0.0640759	0.444618	CycT	cyclin T, isoform C [Drosophila melanogaster]
FBgn0039945	0.479564	0.0640769	0.444618	CG17159	uncharacterized protein Dmel_CG17159, isoform B [Drosophila melanogaster]
FBgn0052085	0.691878	0.0640937	0.444618	CG32085	uncharacterized protein Dmel_CG32085 [Drosophila melanogaster]
FBgn0264389	0.263572	0.0641397	0.444618	opm	opossum, isoform A [Drosophila melanogaster]
FBgn0033926	-0.159148	0.0641829	0.444618	Arc1	Activity-regulated cytoskeleton associated protein 1 [Drosophila melanogaster]
FBgn0027556	0.188377	0.0641882	0.444618	CG4928	uncharacterized protein Dyak_GE17635, isoform A [Drosophila yakuba]
FBgn0029114	-0.244254	0.0641988	0.444618	Tollo	tollo [Drosophila melanogaster]
FBgn0034093	-0.243562	0.0643162	0.444912	CG15706	uncharacterized protein Dmel_CG15706, isoform B [Drosophila melanogaster]
FBgn0037906	-0.210879	0.0643273	0.444912	PGRP-LB	peptidoglycan recognition protein LB, isoform D [Drosophila melanogaster]
FBgn0032839	-0.417506	0.0644708	0.445607	AANATL3	arylalkylamine N-acetyltransferase-like 3 [Drosophila melanogaster]
FBgn0263316	-0.165211	0.064516	0.445622	Mrp4	multidrug resistance protein 4 [Drosophila melanogaster]
FBgn0039227	-0.211083	0.0646941	0.446554	polybromo	polybromo [Drosophila melanogaster]
FBgn0038140	1.13289	0.0648927	0.447615	PK2-R1	pyrokinin 2 receptor 1 [Drosophila melanogaster]
FBgn0040347	-0.197161	0.0649345	0.447615	mus81	mus81 [Drosophila melanogaster]
FBgn0015400	0.598383	0.0651765	0.448984	kek2	kekkon 2 [Drosophila melanogaster]
FBgn0033341	0.248702	0.0652818	0.449316	MrgBP	MRG/MORF4L binding protein [Drosophila melanogaster]
FBgn0004611	0.172215	0.0653116	0.449316	Plc21C	phospholipase C at 21C, isoform D [Drosophila melanogaster]
FBgn0029714	0.269026	0.0654924	0.450261	CG3527	uncharacterized protein Dmel_CG3527 [Drosophila melanogaster]
FBgn0034082	3.29278	0.0656432	1	CG10734	uncharacterized protein Dmel_CG10734 [Drosophila melanogaster]
FBgn0038261	-0.872244	0.0658114	0.452153	CG14856	uncharacterized protein Dmel_CG14856 [Drosophila melanogaster]
FBgn0051712	0.220556	0.0658818	0.45227	CG31712	***** No hits found *****
FBgn0004394	0.550077	0.065916	0.45227	pdm2	POU domain protein 2, isoform C [Drosophila melanogaster]
FBgn0262115	0.187439	0.0660908	0.452743	CG17683	uncharacterized protein Dmel_CG17683, isoform A [Drosophila melanogaster]
FBgn0041164	-0.175188	0.0661313	0.452743	armi	armitage, isoform B [Drosophila melanogaster]
FBgn0013469	-0.450661	0.0661484	0.452743	klu	klumpfuss, isoform C [Drosophila melanogaster]
FBgn0051550	-0.184437	0.06616	0.452743	CG31550	uncharacterized protein Dmel_CG31550, isoform D [Drosophila melanogaster]
FBgn0010246	-0.116786	0.0663315	0.453617	Myo61F	myosin 61F, isoform D [Drosophila melanogaster]
FBgn0041182	-0.182456	0.066527	0.454304	Tep2	Thioester-containing protein 2, isoform A [Drosophila melanogaster]
FBgn0027547	-0.126227	0.0665599	0.454304	CG1927	uncharacterized protein Dmel_CG1927, isoform A [Drosophila melanogaster]
FBgn0085491	-1.43812	0.0665639	0.454304	CG34462	uncharacterized protein Dmel_CG34462 [Drosophila melanogaster]
FBgn0028504	-0.45344	0.066701	0.454939	CG12182	uncharacterized protein Dmel_CG12182, isoform C [Drosophila melanogaster]
FBgn0041709	1.5375	0.0667615	0.455052	yellow-g	yellow-g [Drosophila melanogaster]
FBgn0259896	-0.194146	0.0668175	0.455134	NimC1	nimrod C1, isoform B [Drosophila melanogaster]
FBgn0039683	2.926	0.066834	1	dmrt99B	doublesex-Mab related 99B [Drosophila melanogaster]
FBgn0053526	0.245908	0.0670072	0.456125	PNUTS	PNUTSDm protein [Drosophila melanogaster]
FBgn0260446	0.572579	0.0671028	0.456475	GABA-B-R1	metabotropic GABA-B receptor subtype 1, isoform C [Drosophila melanogaster]
FBgn0034073	-0.223535	0.0672221	0.456987	CG8414	uncharacterized protein Dmel_CG8414 [Drosophila melanogaster]
FBgn0011591	0.286626	0.0673233	0.457374	fng	fringe [Drosophila melanogaster]
FBgn0015577	-0.165255	0.0674144	0.457692	alpha-Est9	alpha-Esterase-9, isoform D [Drosophila melanogaster]
FBgn0266084	-0.135733	0.0675548	0.458157	Fhos	formin homology 2 domain containing, isoform J [Drosophila melanogaster]
FBgn0039920	0.124354	0.0675715	0.458157	CG11360	uncharacterized protein Dmel_CG11360, isoform C [Drosophila melanogaster]
FBgn0034158	-0.243489	0.0676172	0.458166	CG5522	uncharacterized protein Dmel_CG5522, isoform A [Drosophila melanogaster]
FBgn0033551	0.194734	0.0677172	0.458543	CG7222	uncharacterized protein Dmel_CG7222, isoform B [Drosophila melanogaster]
FBgn0028543	0.240008	0.067769	0.458594	NimB2	nimrod B2 [Drosophila melanogaster]
FBgn0039580	0.210693	0.0680222	0.459893	Gfat2	Glutamine:fructose-6-phosphate aminotransferase 2 [Drosophila melanogaster]
FBgn0037835	0.262656	0.0680499	0.459893	CG14687	uncharacterized protein Dmel_CG14687 [Drosophila melanogaster]
FBgn0051663	0.256631	0.0681969	0.460435	CG31663	uncharacterized protein Dmel_CG31663, isoform C [Drosophila melanogaster]
FBgn0014863	0.198748	0.0682192	0.460435	Mlp84B	muscle LIM protein at 84B, isoform C [Drosophila melanogaster]
FBgn0030912	-0.355659	0.0682944	0.460502	CG6023	uncharacterized protein Dmel_CG6023, isoform C [Drosophila melanogaster]
FBgn0264699	0.622559	0.0683594	0.460502	CG43968	uncharacterized protein Dmel_CG43968 [Drosophila melanogaster]
FBgn0034985	-0.229026	0.0683627	0.460502	CG3328	uncharacterized protein Dmel_CG3328, isoform B [Drosophila melanogaster]
FBgn0265523	-0.177085	0.0684734	0.460947	Smr	smrter, isoform D [Drosophila melanogaster]
FBgn0037228	-0.291962	0.0687488	0.4625	CG1092	uncharacterized protein Dmel_CG1092, isoform D [Drosophila melanogaster]
FBgn0027521	-0.217795	0.068832	0.462759	CG3679	uncharacterized protein Dmel_CG3679, isoform B [Drosophila melanogaster]
FBgn0034187	-0.187078	0.0689509	0.463088	CG6967	LD34829p [Drosophila melanogaster]
FBgn0033649	-0.27684	0.0689705	0.463088	pyr	pyramus [Drosophila melanogaster]
FBgn0030349	0.215583	0.0690599	0.463387	CG10353	uncharacterized protein Dmel_CG10353, isoform E [Drosophila melanogaster]
FBgn0262519	-0.17271	0.0691406	0.463627	Mi-2	Mi-2, isoform C [Drosophila melanogaster]
FBgn0039914	-0.138208	0.0691949	0.463691	mav	maverick [Drosophila melanogaster]
FBgn0035541	0.207982	0.0694015	0.464775	CG15019	uncharacterized protein Dmel_CG15019, isoform B [Drosophila melanogaster]
FBgn0267689	-2.5025	0.0697632	1	CG46025	uncharacterized protein Dmel_CG46025, isoform D [Drosophila melanogaster]
FBgn0005658	0.755895	0.069787	0.466977	Ets65A	Ets at 65A, isoform D [Drosophila melanogaster]
FBgn0026401	0.187394	0.0698208	0.466977	Nipped-B	Nipped-B, isoform F [Drosophila melanogaster]
FBgn0036157	0.368604	0.0699058	0.467243	CG7560	uncharacterized protein Dmel_CG7560 [Drosophila melanogaster]
FBgn0038191	-0.165513	0.0700429	0.467683	CG9925	uncharacterized protein Dmel_CG9925 [Drosophila melanogaster]
FBgn0028381	-0.136665	0.0701089	0.467683	Decay	death executioner caspase related to Apopain/Yama [Drosophila melanogaster]
FBgn0041096	-0.207038	0.070119	0.467683	rols	rolling pebbles, isoform B [Drosophila melanogaster]
FBgn0035238	-0.240044	0.0702052	0.467683	CG12104	uncharacterized protein Dmel_CG12104, isoform B [Drosophila melanogaster]
FBgn0039483	-0.320922	0.0702118	0.467683	CG14259	uncharacterized protein Dmel_CG14259 [Drosophila melanogaster]
FBgn0285955	-0.128117	0.0702428	0.467683	cv-c	crossveinless c, isoform C [Drosophila melanogaster]
FBgn0033982	-0.315385	0.0704255	0.468509	Cyp317a1	Cyp317a1, isoform B [Drosophila melanogaster]
FBgn0020521	0.252585	0.0704576	0.468509	pio	piopio, isoform D [Drosophila melanogaster]
FBgn0025382	0.616671	0.0706237	0.469312	Rab27	ras-related protein Rab-27A isoform X2 [Drosophila mauritiana]
FBgn0083962	-0.183505	0.0707976	0.470165	CG34126	uncharacterized protein Dmel_CG34126, isoform F [Drosophila melanogaster]
FBgn0286833	-1.15692	0.0708482	0.470199	CG46387	uncharacterized protein Dmel_CG46387 [Drosophila melanogaster]
FBgn0001114	-0.127947	0.0712097	0.471923	Glt	glutactin, isoform D [Drosophila melanogaster]
FBgn0033724	-0.801454	0.0712261	0.471923	CG8501	uncharacterized protein Dmel_CG8501, isoform B [Drosophila melanogaster]
FBgn0023172	-0.131652	0.0712449	0.471923	RhoGEF2	Rho guanine nucleotide exchange factor 2, isoform D [Drosophila melanogaster]
FBgn0266101	-0.175663	0.0713672	0.472229	CG44838	uncharacterized protein Dmel_CG44838, isoform I [Drosophila melanogaster]
FBgn0039774	-0.194733	0.0713824	0.472229	CDase	ceramidase, isoform F [Drosophila melanogaster]
FBgn0032421	0.254831	0.0714743	0.472535	crok	--
FBgn0015010	0.204627	0.0715367	0.472645	Ag5r	antigen 5-related, isoform B [Drosophila melanogaster]
FBgn0003189	-0.160312	0.0717196	0.473446	r	rudimentary, isoform D [Drosophila melanogaster]
FBgn0036212	0.589937	0.0717648	0.473446	CG11597	uncharacterized protein Dmel_CG11597, isoform B [Drosophila melanogaster]
FBgn0038842	-0.164425	0.0717954	0.473446	hdly	hadley, isoform B [Drosophila melanogaster]
FBgn0260756	0.322693	0.0718441	0.473466	CG42554	uncharacterized protein Dmel_CG42554 [Drosophila melanogaster]
FBgn0034878	-0.162783	0.0719214	0.473673	pita	pita, isoform A [Drosophila melanogaster]
FBgn0040104	-0.256155	0.0721824	0.47509	lectin-24A	lectin-24A [Drosophila melanogaster]
FBgn0030151	-0.116493	0.072441	0.476489	CG1354	uncharacterized protein Dmel_CG1354, isoform E [Drosophila melanogaster]
FBgn0038092	0.932886	0.0725106	0.476507	beat-Vb	beaten path Vb, isoform B [Drosophila melanogaster]
FBgn0032505	0.156653	0.0726425	0.476507	CG16826	--
FBgn0027550	-0.249504	0.0726755	0.476507	CG6495	uncharacterized protein Dmel_CG6495 [Drosophila melanogaster]
FBgn0266489	-0.186578	0.0726822	0.476507	CG45088	***** No hits found *****
FBgn0004864	-0.202999	0.0726976	0.476507	hop	hopscotch [Drosophila melanogaster]
FBgn0032523	1.45595	0.0727204	0.476507	CG16956	--
FBgn0036921	0.191691	0.0728615	0.47713	RhoGDI	RhoGDI, isoform B [Drosophila melanogaster]
FBgn0032706	0.213121	0.0729583	0.477461	Irk3	inwardly rectifying potassium channel 3, isoform D [Drosophila melanogaster]
FBgn0028374	0.39482	0.0731753	0.478578	Hug	hugin [Drosophila melanogaster]
FBgn0050345	-0.19112	0.0735918	0.480685	CG30345	uncharacterized protein Dmel_CG30345 [Drosophila melanogaster]
FBgn0026593	-0.156752	0.0736198	0.480685	CG5707	uncharacterized protein Dmel_CG5707, isoform B [Drosophila melanogaster]
FBgn0003598	-0.237775	0.0736571	0.480685	Su(var)3-7	suppressor of variegation 3-7, isoform A [Drosophila melanogaster]
FBgn0038878	-0.310148	0.0736833	0.480685	CG3301	uncharacterized protein Dmel_CG3301, isoform C [Drosophila melanogaster]
FBgn0036367	-0.165709	0.0738969	0.481531	CG10116	uncharacterized protein Dmel_CG10116 [Drosophila melanogaster]
FBgn0036765	-0.193168	0.073999	0.481531	CG7408	uncharacterized protein Dmel_CG7408, isoform C [Drosophila melanogaster]
FBgn0085391	0.525461	0.0740445	0.481531	trv	trivet, isoform I [Drosophila melanogaster]
FBgn0039768	-0.366334	0.0740703	0.481531	CG15533	uncharacterized protein Dmel_CG15533 [Drosophila melanogaster]
FBgn0034060	-0.165531	0.0740783	0.481531	CG8370	uncharacterized protein Dmel_CG8370, isoform B [Drosophila melanogaster]
FBgn0050109	0.264987	0.0740925	0.481531	CG30109	uncharacterized protein Dmel_CG30109 [Drosophila melanogaster]
FBgn0038718	0.199285	0.0742451	0.48222	CG17752	uncharacterized protein Dmel_CG17752 [Drosophila melanogaster]
FBgn0263607	-0.227852	0.0742985	0.482264	l(3)72Dp	lethal (3) 72Dp [Drosophila melanogaster]
FBgn0003124	-0.124504	0.0745326	0.483316	polo	polo, isoform B [Drosophila melanogaster]
FBgn0051674	-0.289902	0.074554	0.483316	CG31674	uncharacterized protein Dmel_CG31674, isoform B [Drosophila melanogaster]
FBgn0085405	-0.176757	0.0748847	0.485155	CG34376	uncharacterized protein Dmel_CG34376, isoform A [Drosophila melanogaster]
FBgn0262613	3.5025	0.0751012	1	CG43139	uncharacterized protein Dmel_CG43139, isoform A [Drosophila melanogaster]
FBgn0052201	3.16993	0.0751413	1	CG32201	uncharacterized protein Dmel_CG32201 [Drosophila melanogaster]
FBgn0000535	0.807355	0.0751791	0.486758	eag	ether a go-go, isoform B [Drosophila melanogaster]
FBgn0031305	0.201834	0.0752495	0.486908	Iris	iris [Drosophila melanogaster]
FBgn0039977	0.222187	0.0753332	0.487145	CG17454	uncharacterized protein Dmel_CG17454, isoform A [Drosophila melanogaster]
FBgn0015602	0.198869	0.0755099	0.487983	BEAF-32	boundary element-associated factor of 32kD, isoform A [Drosophila melanogaster]
FBgn0260775	-0.226297	0.0756498	0.488234	DnaJ-60	DnaJ-like-60, isoform A [Drosophila melanogaster]
FBgn0000406	-0.128962	0.0756781	0.488234	Cyt-b5-r	cytochrome b5-related, isoform B [Drosophila melanogaster]
FBgn0014865	-2.13704	0.0757319	0.488234	Mtk	metchnikowin [Drosophila melanogaster]
FBgn0085201	-0.434916	0.0757376	0.488234	CG34172	uncharacterized protein Dmel_CG34172, isoform A [Drosophila melanogaster]
FBgn0003965	-0.246138	0.0758047	0.488362	v	vermilion [Drosophila melanogaster]
FBgn0024811	0.204615	0.0758864	0.488584	Crk	Crk oncogene, isoform A [Drosophila melanogaster]
FBgn0261797	0.179262	0.0761087	0.48971	Dhc64C	dynein heavy chain 64C, isoform I [Drosophila melanogaster]
FBgn0285917	-0.245154	0.076181	0.48987	sbb	scribbler, isoform J [Drosophila melanogaster]
FBgn0028533	-0.160862	0.0762759	0.490176	CG7953	uncharacterized protein Dmel_CG7953, isoform B [Drosophila melanogaster]
FBgn0033005	0.20817	0.0763926	0.490621	CG3107	uncharacterized protein Dmel_CG3107, isoform C [Drosophila melanogaster]
FBgn0030425	0.203349	0.0764793	0.490873	Nep6	neprilysin 6, isoform B [Drosophila melanogaster]
FBgn0038381	-0.223126	0.0766027	0.491235	EndoU	endoribonuclease U-specific [Drosophila melanogaster]
FBgn0002931	0.477249	0.0766807	0.491235	net	DNA-binding transcription factor NET [Drosophila melanogaster]
FBgn0025366	-0.101283	0.0767086	0.491235	Ip259	intronic protein 259, isoform B [Drosophila melanogaster]
FBgn0261955	0.17656	0.0767258	0.491235	kdn	knockdown, isoform B [Drosophila melanogaster]
FBgn0029994	-0.145831	0.0768721	0.491867	Ldsdh1	lipid droplet subset dehydrogenase 1 [Drosophila melanogaster]
FBgn0021764	-0.148057	0.0770338	0.492597	sdk	--
FBgn0259216	0.412383	0.0772904	0.493832	RhoGAP102A	Rho GTPase activating protein at 102A, isoform D [Drosophila melanogaster]
FBgn0022355	0.228997	0.0773225	0.493832	Tsf1	LP08340p, partial [Drosophila melanogaster]
FBgn0034390	0.179364	0.0773826	0.493911	CG15093	uncharacterized protein Dmel_CG15093, isoform E [Drosophila melanogaster]
FBgn0000355	1.90439	0.0774842	0.494116	Cp15	chorion protein 15 [Drosophila melanogaster]
FBgn0038416	-0.259867	0.0775103	0.494116	CG17930	uncharacterized protein Dmel_CG17930 [Drosophila melanogaster]
FBgn0035779	0.206994	0.0775584	0.494118	CG8562	uncharacterized protein Dmel_CG8562 [Drosophila melanogaster]
FBgn0013678	0.223038	0.0776577	0.494134	mt:Cyt-b	--
FBgn0001258	-0.216902	0.0776714	0.494134	Ldh	lactate dehydrogenase, isoform B [Drosophila melanogaster]
FBgn0024232	0.672959	0.0777043	0.494134	gprs	gprs, isoform A [Drosophila melanogaster]
FBgn0010583	-0.187791	0.07778	0.494244	dock	dreadlocks, isoform D [Drosophila melanogaster]
FBgn0263977	0.192801	0.0778171	0.494244	Tim17b	translocase of the inner mitochondrial membrane 17b, isoform A [Drosophila melanogaster]
FBgn0053178	-0.234983	0.0779685	0.494897	CG33178	uncharacterized protein Dmel_CG33178, isoform B [Drosophila melanogaster]
FBgn0262582	-0.150029	0.0780463	0.494897	cic	capicua, isoform G [Drosophila melanogaster]
FBgn0052191	-0.245074	0.0780884	0.494897	CG32191	uncharacterized protein Dmel_CG32191, isoform C [Drosophila melanogaster]
FBgn0034950	0.664297	0.0781282	0.494897	Pask	PAS kinase [Drosophila melanogaster]
FBgn0037750	-0.174018	0.0781593	0.494897	Whamy	WHAMM and JMY related, isoform B [Drosophila melanogaster]
FBgn0030991	-0.147146	0.0783576	0.495849	CG7453	LD05845p, partial [Drosophila melanogaster]
FBgn0039403	0.399171	0.0784727	0.495888	Sld5	Sld5 [Drosophila melanogaster]
FBgn0037993	0.925038	0.0784884	0.495888	dpr15	defective proboscis extension response 15, isoform B [Drosophila melanogaster]
FBgn0039818	-0.311648	0.0785076	0.495888	CG11318	uncharacterized protein Dmel_CG11318 [Drosophila melanogaster]
FBgn0261274	-0.174139	0.0786791	0.496668	Ero1L	endoplasmic reticulum oxidoreductin-1-like [Drosophila melanogaster]
FBgn0053965	-0.38446	0.0788029	0.497146	CG33965	uncharacterized protein Dmel_CG33965 [Drosophila melanogaster]
FBgn0004513	0.300746	0.0788765	0.497152	Mdr65	multi drug resistance 65 [Drosophila melanogaster]
FBgn0039900	0.330775	0.0789	0.497152	Syt7	synaptotagmin 7, isoform A [Drosophila melanogaster]
FBgn0032685	0.401302	0.0790115	0.497358	CG10211	--
FBgn0267796	0.493246	0.0790289	0.497358	Tmc	transmembrane channel-like, isoform C [Drosophila melanogaster]
FBgn0038234	0.293942	0.0790854	0.49741	mRpL11	mitochondrial ribosomal protein L11 [Drosophila melanogaster]
FBgn0004898	3.58496	0.0791874	1	fd96Cb	forkhead domain 96Cb [Drosophila melanogaster]
FBgn0259231	1.29373	0.0793076	0.498505	CCKLR-17D1	Cholecystokinin-like receptor at 17D1 [Drosophila melanogaster]
FBgn0030926	-0.256289	0.0794189	0.498901	psh	persephone [Drosophila melanogaster]
FBgn0040005	0.232614	0.0797246	0.500518	CG17883	uncharacterized protein Dmel_CG17883, isoform A [Drosophila melanogaster]
FBgn0029676	0.172493	0.0797817	0.500572	HIP-R	LD06637p, partial [Drosophila melanogaster]
FBgn0003089	0.745322	0.0798506	0.500701	pip	pipe, isoform L [Drosophila melanogaster]
FBgn0032233	0.52337	0.0800571	0.501513	dpr19	--
FBgn0030158	0.254104	0.0800772	0.501513	CG9686	uncharacterized protein Dmel_CG9686 [Drosophila melanogaster]
FBgn0038100	0.116693	0.0801965	0.50189	Paip2	uncharacterized protein Dere_GG19302, isoform A [Drosophila erecta]
FBgn0031694	-0.417797	0.0802345	0.50189	Cyp4ac2	Cyp4ac2 [Drosophila melanogaster]
FBgn0051391	2.61471	0.0803304	1	CG31391	uncharacterized protein Dmel_CG31391 [Drosophila melanogaster]
FBgn0036447	6.73697	0.0804229	1	CG17173	uncharacterized protein Dmel_CG17173 [Drosophila melanogaster]
FBgn0051719	-0.243292	0.0804263	0.502786	RluA-1	RluA pseudouridine synthase 1, isoform A [Drosophila melanogaster]
FBgn0031821	-0.461158	0.0804954	0.502914	KFase	--
FBgn0032895	0.645838	0.0806895	0.503822	twit	target of wit [Drosophila melanogaster]
FBgn0029094	0.188007	0.0807843	0.504109	asf1	anti-silencing factor 1, isoform B [Drosophila melanogaster]
FBgn0041156	0.448758	0.0811385	0.505741	exex	extra-extra [Drosophila melanogaster]
FBgn0000358	1.70674	0.0811436	0.505741	Cp19	chorion protein 19 [Drosophila melanogaster]
FBgn0030629	-0.254039	0.0814599	0.506889	CG9123	uncharacterized protein Dmel_CG9123 [Drosophila melanogaster]
FBgn0037565	-0.160218	0.081463	0.506889	CG9626	uncharacterized protein Dmel_CG9626, isoform B [Drosophila melanogaster]
MSTRG.2140	1	0.0814964	0.506889	--	--
FBgn0010406	-0.134728	0.0815238	0.506889	RNaseX25	RE50319p [Drosophila melanogaster]
FBgn0033911	0.470666	0.0816425	0.507014	VGAT	vesicular GABA transporter [Drosophila melanogaster]
FBgn0043791	-0.995211	0.0816901	0.507014	phu	phurba tashi [Drosophila melanogaster]
FBgn0027108	-0.151456	0.0816924	0.507014	Inx2	innexin 2, isoform C [Drosophila melanogaster]
FBgn0051343	-0.134943	0.0817401	0.507014	CG31343	uncharacterized protein Dmel_CG31343 [Drosophila melanogaster]
FBgn0035120	0.288099	0.0820197	0.50836	wac	wee augmin, isoform D [Drosophila melanogaster]
FBgn0261983	-0.15306	0.0820554	0.50836	l(2)gd1	lethal (2) giant discs 1, isoform B [Drosophila melanogaster]
FBgn0035918	-0.207453	0.0821384	0.508569	Cdc6	Cdc6 [Drosophila melanogaster]
FBgn0031986	2.71272	0.0824459	1	CG8673	--
FBgn0003074	-0.0985125	0.0824719	0.510329	Pgi	phosphoglucose isomerase, isoform A [Drosophila melanogaster]
FBgn0033289	-0.472852	0.082574	0.510655	CG2121	uncharacterized protein Dmel_CG2121, isoform B [Drosophila melanogaster]
FBgn0283724	-0.201769	0.0827792	0.511618	Girdin	girdin, isoform A [Drosophila melanogaster]
FBgn0013684	0.432376	0.0831631	0.513529	mt:ND5	--
FBgn0038564	0.255737	0.0832	0.513529	CG7785	uncharacterized protein Dmel_CG7785 [Drosophila melanogaster]
FBgn0013323	-0.362716	0.0832374	0.513529	Ptth	prothoracicotropic hormone, isoform F [Drosophila melanogaster]
FBgn0027784	0.245842	0.0834022	0.513826	Prp18	Prp18 [Drosophila melanogaster]
FBgn0034909	0.208849	0.0834222	0.513826	CG4797	uncharacterized protein Dmel_CG4797 [Drosophila melanogaster]
FBgn0085421	0.196555	0.0834346	0.513826	Epac	exchange protein directly activated by cAMP, isoform E [Drosophila melanogaster]
FBgn0039749	-1.94753	0.0835444	1	CG11498	uncharacterized protein Dmel_CG11498, isoform D [Drosophila melanogaster]
FBgn0040759	0.658233	0.0837445	0.515301	CG13177	uncharacterized protein Dmel_CG13177, isoform A [Drosophila melanogaster]
FBgn0034722	-0.159208	0.0838138	0.515301	Rtf1	Rtf1, isoform B [Drosophila melanogaster]
FBgn0259918	0.334262	0.0839045	0.515301	inaF-B	inaF-B [Drosophila melanogaster]
FBgn0027086	0.195588	0.0839147	0.515301	IleRS	Isoleucyl-tRNA synthetase, isoform C [Drosophila melanogaster]
FBgn0013679	0.418231	0.0839596	0.515301	mt:ND1	--
FBgn0029147	-0.207705	0.0839866	0.515301	NtR	FI19009p1, partial [Drosophila melanogaster]
FBgn0034067	-0.150942	0.0840229	0.515301	CG8399	uncharacterized protein Dmel_CG8399, isoform B [Drosophila melanogaster]
FBgn0261673	0.20841	0.0841072	0.515512	nemy	no extended memory, isoform A [Drosophila melanogaster]
FBgn0020372	0.4103	0.0842581	0.51613	TM4SF	transmembrane 4 superfamily, isoform A [Drosophila melanogaster]
FBgn0035434	-0.372727	0.0844493	0.516866	Drsl5	Drosomycin-like 5 [Drosophila melanogaster]
FBgn0284246	0.185185	0.0844781	0.516866	l(2)k09848	lethal (2) k09848, isoform B [Drosophila melanogaster]
FBgn0001316	-0.112522	0.0846187	0.516917	klar	klarsicht, isoform E [Drosophila melanogaster]
FBgn0083975	0.75409	0.0847109	0.516917	Nlg4	neuroligin 4, isoform D [Drosophila melanogaster]
FBgn0035170	0.654225	0.0847257	0.516917	dpr20	defective proboscis extension response 20 [Drosophila melanogaster]
FBgn0085320	-0.435785	0.0848178	0.516917	CG34291	uncharacterized protein Dmel_CG34291 [Drosophila melanogaster]
FBgn0043362	-0.189233	0.0848774	0.516917	bchs	blue cheese [Drosophila melanogaster]
FBgn0030157	-0.117037	0.0848787	0.516917	CG1468	uncharacterized protein Dmel_CG1468 [Drosophila melanogaster]
FBgn0038037	-0.116461	0.0849134	0.516917	Cyp9f2	Cyp9f2 [Drosophila melanogaster]
FBgn0020620	-0.156738	0.0849435	0.516917	RN-tre	related to the N terminus of tre oncogene, isoform A [Drosophila melanogaster]
FBgn0032205	0.255636	0.0849765	0.516917	CG4957	--
FBgn0263776	-0.124772	0.0850221	0.516917	CG43693	uncharacterized protein Dmel_CG43693, isoform G [Drosophila melanogaster]
FBgn0039308	0.177686	0.0850363	0.516917	CG11889	uncharacterized protein Dmel_CG11889, isoform B [Drosophila melanogaster]
FBgn0037166	-0.165143	0.0851519	0.517315	CG11426	uncharacterized protein Dmel_CG11426 [Drosophila melanogaster]
FBgn0036193	0.334951	0.0853529	0.518232	CG14135	uncharacterized protein Dmel_CG14135, isoform C [Drosophila melanogaster]
FBgn0036285	0.576192	0.085492	0.518772	toe	twin of eyg, isoform A [Drosophila melanogaster]
FBgn0032848	0.275166	0.0856374	0.519175	nesd	nessun dorma, isoform A [Drosophila melanogaster]
FBgn0052029	-0.37894	0.0857388	0.519175	Cpr66D	alpha-protein kinase 1 [Drosophila sechellia]
FBgn0038020	0.245649	0.0857673	0.519175	GstD9	AT21115p, partial [Drosophila melanogaster]
FBgn0034070	0.391534	0.0857977	0.519175	SP2353	SP2353, isoform B [Drosophila melanogaster]
FBgn0020257	-0.188782	0.0858584	0.519175	Ppa	partner of paired, isoform C [Drosophila melanogaster]
FBgn0010638	0.173681	0.0858597	0.519175	Sec61beta	uncharacterized protein Dpse_GA10096 [Drosophila pseudoobscura pseudoobscura]
MSTRG.2158	0.219448	0.0859553	0.519415	pol	--
FBgn0036360	1.1964	0.0860341	0.519415	CG10713	uncharacterized protein Dmel_CG10713 [Drosophila melanogaster]
FBgn0264296	0.20005	0.0860502	0.519415	CG43774	uncharacterized protein Dmel_CG43774 [Drosophila melanogaster]
FBgn0030262	-0.196857	0.0861619	0.519786	Vago	GH22911p, partial [Drosophila melanogaster]
FBgn0085241	-0.180864	0.086213	0.519792	CG34212	uncharacterized protein Dmel_CG34212, isoform A [Drosophila melanogaster]
FBgn0031069	-0.0996148	0.0863004	0.520015	Pmp70	peroxisomal membrane protein 70 kDa, isoform B [Drosophila melanogaster]
FBgn0001086	-0.197981	0.0864278	0.52048	fzy	fizzy [Drosophila melanogaster]
FBgn0036853	0.234264	0.0865425	0.520867	mRpL21	mitochondrial ribosomal protein L21, isoform B [Drosophila melanogaster]
FBgn0038491	0.2288	0.0866007	0.520914	CG5292	uncharacterized protein Dmel_CG5292, isoform B [Drosophila melanogaster]
FBgn0031033	-0.676923	0.0867797	0.521546	CG14219	uncharacterized protein Dmel_CG14219 [Drosophila melanogaster]
FBgn0038420	0.260364	0.0868371	0.521546	CG10311	uncharacterized protein Dmel_CG10311, isoform B [Drosophila melanogaster]
FBgn0052250	-0.15634	0.086857	0.521546	PMP34	peroxisomal membrane protein 34, isoform B [Drosophila melanogaster]
FBgn0001105	0.0888901	0.0869496	0.521799	Gbeta13F	G protein beta-subunit 13F, isoform H [Drosophila melanogaster]
FBgn0033627	-0.37479	0.0870244	0.521945	CG13204	uncharacterized protein Dmel_CG13204, isoform A [Drosophila melanogaster]
FBgn0034940	0.275681	0.0871214	0.522223	CG16787	uncharacterized protein Dmel_CG16787 [Drosophila melanogaster]
FBgn0000377	-0.197083	0.0874303	0.523771	crn	crn [Drosophila melanogaster]
FBgn0051915	-0.235344	0.087608	0.524532	CG31915	LD07116p, partial [Drosophila melanogaster]
FBgn0030245	-0.128812	0.0876681	0.524588	CG1637	uncharacterized protein Dmel_CG1637, isoform D [Drosophila melanogaster]
FBgn0035588	0.236138	0.0877762	0.524784	CG10672	uncharacterized protein Dmel_CG10672 [Drosophila melanogaster]
FBgn0030660	0.242092	0.0878023	0.524784	CG8097	uncharacterized protein Dmel_CG8097, isoform B [Drosophila melanogaster]
FBgn0283439	-1.9386	0.0879441	1	CG46281	IP17475p [Drosophila melanogaster]
FBgn0037712	0.626711	0.0879619	0.525156	CG16789	uncharacterized protein Dmel_CG16789, isoform A [Drosophila melanogaster]
FBgn0040687	0.217312	0.0879662	0.525156	CG14645	uncharacterized protein Dmel_CG14645 [Drosophila melanogaster]
FBgn0030484	-0.154163	0.08806	0.525413	GstT4	glutathione S transferase T4 [Drosophila melanogaster]
FBgn0011740	-0.169245	0.0882324	0.526131	alpha-Man-IIa	alpha-Mannosidase class II a, isoform B [Drosophila melanogaster]
FBgn0010197	1.09954	0.0883402	0.526131	Gyc32E	guanylyl cyclase at 32E, isoform B [Drosophila melanogaster]
FBgn0264959	-0.108585	0.0883587	0.526131	Src42A	Src oncogene at 42A, isoform B [Drosophila melanogaster]
FBgn0032923	-0.145139	0.0883839	0.526131	CG9248	uncharacterized protein Dmel_CG9248, isoform C [Drosophila melanogaster]
FBgn0038845	0.237714	0.0884916	0.526469	Alp5	alkaline phosphatase 5 [Drosophila melanogaster]
FBgn0261836	-0.0245526	0.0886176	0.526807	Msp300	Muscle-specific protein 300 kDa, isoform G [Drosophila melanogaster]
FBgn0034943	-0.359081	0.0886503	0.526807	Fmo-1	Flavin-containing monooxygenase 1 [Drosophila melanogaster]
FBgn0020906	0.273924	0.0888301	0.527269	Jon25Bi	RE01906p [Drosophila melanogaster]
FBgn0261086	0.4468	0.0888457	0.527269	Syt14	synaptotagmin 14, isoform C [Drosophila melanogaster]
FBgn0036927	0.172082	0.088881	0.527269	Gabat	gamma-aminobutyric acid transaminase, isoform C [Drosophila melanogaster]
FBgn0036126	0.278915	0.0889556	0.527409	Irbp18	inverted repeat binding protein 18 kDa, isoform B [Drosophila melanogaster]
FBgn0003862	-0.155633	0.0891578	0.528063	trx	trithorax, isoform D [Drosophila melanogaster]
FBgn0032338	0.709221	0.0891681	0.528063	CG16854	--
FBgn0031759	-0.196198	0.0893087	0.528581	lid	--
FBgn0260234	0.457142	0.089359	0.528581	Xport-B	exit protein of rhodopsin and TRP B, isoform A [Drosophila melanogaster]
FBgn0013674	0.208199	0.0894089	0.528581	mt:CoI	--
FBgn0027091	0.180989	0.0895223	0.528949	CysRS	Cysteinyl-tRNA synthetase [Drosophila melanogaster]
FBgn0030234	0.222333	0.0896826	0.529446	CG15211	uncharacterized protein Dmel_CG15211, isoform B [Drosophila melanogaster]
FBgn0013432	0.226206	0.0897088	0.529446	bcn92	bcn92 [Drosophila melanogaster]
FBgn0259238	0.204469	0.08988	0.530095	CG42336	uncharacterized protein Dmel_CG42336, isoform D [Drosophila melanogaster]
FBgn0033558	0.466085	0.0899334	0.530095	CG12344	uncharacterized protein Dmel_CG12344, isoform C [Drosophila melanogaster]
FBgn0033603	0.487938	0.0900364	0.530095	Cpr47Ef	cuticular protein 47Ef, isoform D [Drosophila melanogaster]
FBgn0015714	-0.1416	0.0900385	0.530095	Cyp6a17	cytochrome P450-6a17, isoform B [Drosophila melanogaster]
FBgn0051199	-0.276602	0.0900751	0.530095	CG31199	uncharacterized protein Dmel_CG31199 [Drosophila melanogaster]
FBgn0031832	-0.196345	0.0903896	0.531643	CG9596	--
FBgn0038498	0.5025	0.0905809	0.532215	beat-IIa	beaten path IIa, isoform B [Drosophila melanogaster]
FBgn0042185	-0.184954	0.0906062	0.532215	MCU	mitochondrial calcium uniporter, isoform H [Drosophila melanogaster]
FBgn0262150	-0.657851	0.090727	0.532215	CG42876	MIP06948p, partial [Drosophila melanogaster]
FBgn0028703	-0.117541	0.090744	0.532215	Nhe3	FI01553p [Drosophila melanogaster]
FBgn0027070	-0.151891	0.0907442	0.532215	Ugt36E1	UDP-glycosyltransferase family 36 member E1, isoform D [Drosophila melanogaster]
FBgn0031657	0.251648	0.0908555	0.532566	CG3756	uncharacterized protein Dmel_CG3756 [Drosophila melanogaster]
FBgn0041711	-0.281149	0.0910015	0.532775	yellow-e	yellow-e [Drosophila melanogaster]
FBgn0034474	0.427636	0.0910179	0.532775	Obp56g	Odorant-binding protein 56g, isoform B [Drosophila melanogaster]
FBgn0032345	2.09954	0.0910597	1	CG14921	--
FBgn0031981	0.26168	0.0910856	0.532775	Megf8	--
FBgn0032744	-0.185115	0.0911196	0.532775	Ttc19	tetratricopeptide repeat domain 19 [Drosophila melanogaster]
FBgn0262614	-0.151956	0.0911488	0.532775	pyd	polychaetoid, isoform O [Drosophila melanogaster]
FBgn0003028	-0.124212	0.0913224	0.533183	ovo	ovo, isoform E [Drosophila melanogaster]
FBgn0015520	-0.160215	0.0913502	0.533183	nonA-l	nonA-like, isoform B [Drosophila melanogaster]
FBgn0031948	0.267471	0.0914476	0.533183	CG7149	--
FBgn0023129	0.178107	0.091464	0.533183	aay	astray [Drosophila melanogaster]
FBgn0030026	-0.0708157	0.0915073	0.533183	sni	sniffer, isoform B [Drosophila melanogaster]
FBgn0046692	0.208392	0.091528	0.533183	Stlk	Ste20-like kinase, isoform A [Drosophila melanogaster]
FBgn0038974	0.257921	0.091657	0.533633	CG5377	uncharacterized protein Dmel_CG5377 [Drosophila melanogaster]
FBgn0039611	-0.187655	0.091845	0.534427	Nepl18	Neprilysin-like 18 [Drosophila melanogaster]
FBgn0037217	-0.622996	0.0919937	0.534992	CG14636	uncharacterized protein Dmel_CG14636, isoform B [Drosophila melanogaster]
FBgn0003169	0.18595	0.0920983	0.535257	put	LP03259p, partial [Drosophila melanogaster]
FBgn0032640	0.170446	0.0921428	0.535257	Sgt	--
FBgn0023549	-0.147679	0.0922495	0.535576	Mct1	monocarboxylate transporter 1, isoform B [Drosophila melanogaster]
FBgn0000299	-0.129465	0.092392	0.536101	Col4a1	collagen type IV alpha 1, isoform A [Drosophila melanogaster]
FBgn0265784	-0.129808	0.0925324	0.536615	CrebB	RT01110p, partial [Drosophila melanogaster]
FBgn0264598	0.28746	0.0927605	0.537636	PsGEF	Protostome-specific GEF, isoform E [Drosophila melanogaster]
FBgn0005672	-0.119634	0.0931724	0.539518	spi	spitz, isoform G [Drosophila melanogaster]
FBgn0039566	-0.148599	0.0931895	0.539518	CG4849	uncharacterized protein Dmel_CG4849 [Drosophila melanogaster]
FBgn0250907	-0.548437	0.0932765	0.53971	Cht10	chitinase 10, isoform A [Drosophila melanogaster]
FBgn0260634	-0.211573	0.093327	0.53971	eIF4G2	eukaryotic translation initiation factor 4G2, isoform C [Drosophila melanogaster]
FBgn0001942	-0.0890143	0.09341	0.539888	eIF4A	eukaryotic translation initiation factor 4A, isoform E [Drosophila melanogaster]
FBgn0029962	0.713287	0.0935344	0.540305	CARPA	carbonic anhydrase-related protein A, isoform C [Drosophila melanogaster]
FBgn0032292	0.198339	0.0937494	0.54115	EMC3	--
FBgn0030196	0.131155	0.0938084	0.54115	Psf3	Psf3, isoform B [Drosophila melanogaster]
FBgn0260793	0.48375	0.0938377	0.54115	2mit	2mit, isoform C [Drosophila melanogaster]
FBgn0262624	0.339124	0.0939274	0.541365	Tmhs	tetraspan membrane protein in hair cell stereocilia, isoform A [Drosophila melanogaster]
FBgn0003517	-0.0820335	0.0940761	0.541921	sta	stubarista, isoform F [Drosophila melanogaster]
FBgn0037141	-0.165156	0.0944664	0.543866	DNApol-eta	DNApol-eta [Drosophila melanogaster]
FBgn0014037	-0.13378	0.0946454	0.544593	Su(Tpl)	Su(Tpl), isoform B [Drosophila melanogaster]
FBgn0001222	-0.125613	0.0948278	0.545205	Hsf	heat shock factor, isoform D [Drosophila melanogaster]
FBgn0014184	0.16822	0.0948571	0.545205	Oda	--
FBgn0261822	0.152255	0.0949121	0.545218	Bsg	basigin, isoform G [Drosophila melanogaster]
FBgn0051097	0.476492	0.0952352	0.546058	CG31097	uncharacterized protein Dmel_CG31097 [Drosophila melanogaster]
FBgn0040383	-0.176355	0.0952426	0.546058	CG5254	uncharacterized protein Dmel_CG5254, isoform A [Drosophila melanogaster]
FBgn0032229	-0.142136	0.0952482	0.546058	CG5045	--
FBgn0029697	1.14803	0.0952698	0.546058	CG15570	uncharacterized protein Dmel_CG15570 [Drosophila melanogaster]
FBgn0004244	0.576925	0.0953464	0.546195	Rdl	resistant to dieldrin, isoform G [Drosophila melanogaster]
FBgn0037678	-0.153398	0.0956025	0.547339	CG16749	uncharacterized protein Dmel_CG16749 [Drosophila melanogaster]
FBgn0033638	0.188484	0.0956519	0.547339	CG9005	uncharacterized protein Dmel_CG9005, isoform B [Drosophila melanogaster]
FBgn0028646	0.160454	0.0957632	0.5475	aralar1	GH21613p, partial [Drosophila melanogaster]
FBgn0039857	-0.0880899	0.0957861	0.5475	RpL6	ribosomal protein L6, isoform B [Drosophila melanogaster]
FBgn0020309	-0.104597	0.0960889	0.548928	crol	crooked legs, isoform B [Drosophila melanogaster]
FBgn0037751	-0.695145	0.0963467	0.549857	topi	matotopetli [Drosophila melanogaster]
FBgn0259234	-0.160998	0.0963579	0.549857	Camta	Calmodulin-binding transcription activator, isoform F [Drosophila melanogaster]
FBgn0052626	-0.142866	0.0964486	0.549977	AMPdeam	AMP deaminase, isoform K [Drosophila melanogaster]
FBgn0015299	0.226691	0.0964854	0.549977	Ssb-c31a	single stranded-binding protein c31A [Drosophila melanogaster]
FBgn0033443	-0.23881	0.0965975	0.550313	CG1698	uncharacterized protein Dmel_CG1698, isoform B [Drosophila melanogaster]
FBgn0051814	0.809569	0.0970013	0.552309	DIP-kappa	Dpr-interacting protein kappa, isoform A [Drosophila melanogaster]
FBgn0003512	0.225366	0.0970756	0.552428	Sry-delta	serendipity delta [Drosophila melanogaster]
FBgn0036032	-0.212721	0.0972049	0.552776	CG16711	uncharacterized protein Dmel_CG16711, isoform C [Drosophila melanogaster]
FBgn0061492	0.214671	0.0972437	0.552776	loj	logjam, isoform E [Drosophila melanogaster]
FBgn0030347	-0.165308	0.0975654	0.554148	CG15739	uncharacterized protein Dmel_CG15739, isoform B [Drosophila melanogaster]
FBgn0031375	1.34104	0.0977427	0.554148	erm	earmuff, isoform A [Drosophila melanogaster]
FBgn0261538	-1.62061	0.0977814	0.554148	CG42662	uncharacterized protein Dmel_CG42662, isoform A [Drosophila melanogaster]
FBgn0029733	-0.135144	0.0978347	0.554148	CG6927	uncharacterized protein Dmel_CG6927 [Drosophila melanogaster]
FBgn0051475	0.789103	0.0978506	0.554148	CG31475	uncharacterized protein Dmel_CG31475, isoform B [Drosophila melanogaster]
FBgn0034408	-0.316234	0.0978694	0.554148	sano	serrano protein [Drosophila melanogaster]
FBgn0058045	0.209909	0.0978895	0.554148	CG40045	uncharacterized protein Dmel_CG40045, isoform A [Drosophila melanogaster]
FBgn0032884	0.168404	0.097946	0.554148	Pomp	pomp [Drosophila melanogaster]
FBgn0004635	0.40732	0.0980264	0.554148	rho	rhomboid, isoform B [Drosophila melanogaster]
FBgn0035557	-0.402586	0.0980353	0.554148	CG11353	uncharacterized protein Dmel_CG11353, isoform B [Drosophila melanogaster]
FBgn0038980	0.805088	0.0980746	0.554148	Octbeta1R	octopamine beta1 receptor, isoform E [Drosophila melanogaster]
FBgn0029789	-0.222522	0.0982898	0.554774	PGAP1	Post-GPI attachment to proteins 1 [Drosophila melanogaster]
FBgn0002524	-0.110952	0.0982926	0.554774	lace	lace, isoform B [Drosophila melanogaster]
FBgn0039172	0.162854	0.0984032	0.555095	Spase22-23	spase 22/23-subunit, isoform B [Drosophila melanogaster]
FBgn0042094	0.209284	0.0986023	0.555915	Adk3	adenylate kinase 3, isoform C [Drosophila melanogaster]
FBgn0261588	-0.287524	0.0987491	0.556439	pdm3	pou domain motif 3, isoform F [Drosophila melanogaster]
FBgn0026433	-0.182502	0.0988461	0.556463	Grip128	Grip128 [Drosophila melanogaster]
FBgn0039064	0.338169	0.098908	0.556463	CG4467	uncharacterized protein Dmel_CG4467, isoform B [Drosophila melanogaster]
FBgn0033485	0.187482	0.0989149	0.556463	RpLP0-like	ribosomal protein LP0-like [Drosophila melanogaster]
FBgn0264895	-0.142677	0.0990575	0.556963	RapGAP1	Rap GTPase activating protein 1, isoform H [Drosophila melanogaster]
FBgn0086346	-0.0954506	0.0993508	0.558198	ALiX	ALG-2 interacting protein X [Drosophila melanogaster]
FBgn0040281	0.388225	0.0994873	0.558198	Aplip1	APP-like protein interacting protein 1, isoform B [Drosophila melanogaster]
FBgn0026371	-0.179415	0.0994949	0.558198	SAK	Sak kinase [Drosophila melanogaster]
FBgn0039006	-0.187312	0.0995019	0.558198	Cyp6d4	Cyp6d4 [Drosophila melanogaster]
FBgn0030777	-0.167559	0.099586	0.558198	CG9672	uncharacterized protein Dmel_CG9672 [Drosophila melanogaster]
FBgn0051157	-0.47552	0.0996012	0.558198	CG31157	uncharacterized protein Dmel_CG31157, isoform C [Drosophila melanogaster]
FBgn0286778	-0.143555	0.0997443	0.558316	CG46385	uncharacterized protein Dmel_CG46385, isoform A [Drosophila melanogaster]
FBgn0278604	-0.189361	0.0997878	0.558316	dmt	dalmatian [Drosophila melanogaster]
FBgn0050069	-0.115528	0.0997996	0.558316	CG30069	uncharacterized protein Dmel_CG30069 [Drosophila melanogaster]
FBgn0039152	0.201095	0.0998381	0.558316	Root	rootletin, isoform E [Drosophila melanogaster]
FBgn0037643	-0.0934252	0.0999724	0.558536	ScsbetaA	Succinyl-coenzyme A synthetase beta subunit, ADP-forming, isoform C [Drosophila melanogaster]
FBgn0036306	-0.17416	0.100003	0.558536	CG10973	uncharacterized protein Dmel_CG10973 [Drosophila melanogaster]
FBgn0051710	-0.312996	0.100126	0.558536	CG31710	uncharacterized protein Dmel_CG31710, isoform D [Drosophila melanogaster]
FBgn0036321	-0.126853	0.100171	0.558536	CG14120	uncharacterized protein Dmel_CG14120 [Drosophila melanogaster]
FBgn0026324	0.272681	0.10025	0.558536	Taf10b	TBP-associated factor 10b [Drosophila melanogaster]
FBgn0263864	-0.164034	0.100325	0.558536	Dark	Death-associated APAF1-related killer, isoform B [Drosophila melanogaster]
FBgn0000416	-0.102064	0.10033	0.558536	Sap-r	Saposin-related, isoform A [Drosophila melanogaster]
FBgn0030137	0.317261	0.100338	0.558536	CG15317	uncharacterized protein Dmel_CG15317 [Drosophila melanogaster]
FBgn0014464	1.79913	0.100364	0.558536	Cp7Fa	chorion protein a at 7F [Drosophila melanogaster]
FBgn0038469	1.3123	0.10047	0.5588	CG4009	uncharacterized protein Dmel_CG4009, isoform C [Drosophila melanogaster]
FBgn0005642	-0.154156	0.100569	0.5588	wdn	wings down [Drosophila melanogaster]
FBgn0035951	0.200763	0.100621	0.5588	CG5068	uncharacterized protein Dmel_CG5068, isoform B [Drosophila melanogaster]
FBgn0016059	-0.152633	0.100679	0.5588	Sema1b	semaphorin 1b, isoform C [Drosophila melanogaster]
FBgn0036534	-0.177354	0.100696	0.5588	DCP2	decapping protein 2, isoform E [Drosophila melanogaster]
FBgn0033395	0.255568	0.100891	0.5588	Cyp4p2	Cyp4p2 [Drosophila melanogaster]
FBgn0021765	0.163205	0.10093	0.5588	scu	AT02390p1, partial [Drosophila melanogaster]
FBgn0026179	-0.127524	0.100947	0.5588	siz	schizo, isoform B [Drosophila melanogaster]
FBgn0036229	-2.87447	0.101034	1	CG7248	uncharacterized protein Dmel_CG7248 [Drosophila melanogaster]
FBgn0034086	0.252542	0.101046	0.5588	CG8441	uncharacterized protein Dmel_CG8441, isoform B [Drosophila melanogaster]
FBgn0029825	0.242194	0.101068	0.5588	CG12728	uncharacterized protein Dmel_CG12728, isoform B [Drosophila melanogaster]
FBgn0031988	-0.11251	0.101104	0.5588	CG8668	--
FBgn0027655	-0.163681	0.101107	0.5588	htt	huntingtin, isoform B [Drosophila melanogaster]
FBgn0263353	0.425926	0.101167	0.5588	CG11000	uncharacterized protein Dmel_CG11000, isoform B [Drosophila melanogaster]
FBgn0004915	0.169739	0.101321	0.5588	TfIIB	transcription factor IIB, isoform B [Drosophila melanogaster]
FBgn0036510	0.166612	0.101449	0.5588	SCCRO	squamous cell carcinoma-related oncogene, isoform C [Drosophila melanogaster]
FBgn0025582	-0.0901	0.101453	0.5588	eIF3e	eukaryotic translation initiation factor 3 subunit e [Drosophila melanogaster]
FBgn0051155	0.246311	0.101476	0.5588	Rpb7	Rpb7 [Drosophila melanogaster]
FBgn0034662	-0.12213	0.101498	0.5588	CG13492	uncharacterized protein Dmel_CG13492 [Drosophila melanogaster]
FBgn0053192	-0.466508	0.101521	0.5588	MtnD	--
FBgn0031881	0.239929	0.101522	0.5588	MME1	--
FBgn0028949	0.273469	0.101623	0.5588	CG15254	uncharacterized protein Dmel_CG15254, isoform B [Drosophila melanogaster]
FBgn0030685	-0.124425	0.101679	0.5588	Graf	GTPase regulator associated with FAK, isoform H [Drosophila melanogaster]
FBgn0035753	-0.0893636	0.101704	0.5588	RpL18	ribosomal protein L18, isoform B [Drosophila melanogaster]
FBgn0002643	-0.189052	0.101708	0.5588	mam	mastermind, isoform D [Drosophila melanogaster]
FBgn0039319	0.325259	0.102006	0.559184	CG13659	uncharacterized protein Dmel_CG13659 [Drosophila melanogaster]
FBgn0011725	-0.176445	0.102009	0.559184	twin	twin, isoform C [Drosophila melanogaster]
FBgn0002781	-0.133645	0.102013	0.559184	mod(mdg4)	modifier of mdg4, isoform E [Drosophila melanogaster]
FBgn0040375	0.276924	0.102044	0.559184	CG13760	uncharacterized protein Dmel_CG13760, isoform C [Drosophila melanogaster]
FBgn0030600	-0.158889	0.102099	0.559184	hiw	highwire, isoform B [Drosophila melanogaster]
FBgn0025186	-0.195672	0.102102	0.559184	ari-2	ariadne 2 [Drosophila melanogaster]
FBgn0015371	-0.124023	0.102158	0.559194	chn	charlatan, isoform F [Drosophila melanogaster]
FBgn0021767	0.734655	0.102418	0.559644	org-1	optomotor-blind-related-gene-1, isoform B [Drosophila melanogaster]
FBgn0036662	-0.165121	0.102425	0.559644	CG9706	uncharacterized protein Dmel_CG9706, isoform C [Drosophila melanogaster]
FBgn0031575	-0.163913	0.102432	0.559644	Cep97	centrosomal protein 97kDa, isoform B [Drosophila melanogaster]
FBgn0266441	-0.194316	0.102457	0.559644	CG45071	uncharacterized protein Dmel_CG45071, isoform A [Drosophila melanogaster]
FBgn0259714	0.481929	0.102585	0.559857	DIP-epsilon	Dpr-interacting protein epsilon [Drosophila melanogaster]
FBgn0010359	0.328646	0.102604	0.559857	gammaTry	deltaTrypsin [Drosophila melanogaster]
FBgn0030775	0.170501	0.102798	0.560552	CG9673	uncharacterized protein Dmel_CG9673, isoform B [Drosophila melanogaster]
FBgn0035357	-0.172563	0.102851	0.560552	MEP-1	MEP-1, isoform G [Drosophila melanogaster]
FBgn0037525	0.0859477	0.102894	0.560552	CG17816	uncharacterized protein Dmel_CG17816, isoform G [Drosophila melanogaster]
FBgn0026379	0.205354	0.103202	0.561208	Pten	phosphatase and tensin homolog, isoform G [Drosophila melanogaster]
FBgn0027866	-0.0943799	0.103208	0.561208	CG9776	uncharacterized protein Dmel_CG9776, isoform A [Drosophila melanogaster]
FBgn0000032	-0.136453	0.103215	0.561208	Acph-1	acid phosphatase 1, isoform B [Drosophila melanogaster]
FBgn0030148	0.203218	0.103232	0.561208	CG3106	uncharacterized protein Dmel_CG3106, isoform B [Drosophila melanogaster]
FBgn0034295	0.150375	0.103485	0.562286	CG10911	uncharacterized protein Dmel_CG10911 [Drosophila melanogaster]
FBgn0266354	0.346506	0.10368	0.563052	CG45002	uncharacterized protein Dmel_CG45002, isoform D [Drosophila melanogaster]
FBgn0015034	-0.228179	0.103778	0.563291	Cyp4e1	cytochrome P450-4e1 [Drosophila melanogaster]
FBgn0030551	0.157254	0.103976	0.564064	CG11674	uncharacterized protein Dmel_CG11674 [Drosophila melanogaster]
FBgn0039907	-0.147833	0.104032	0.564077	lgs	legless [Drosophila melanogaster]
FBgn0036287	0.49417	0.104199	0.564683	CG10663	uncharacterized protein Dmel_CG10663, isoform B [Drosophila melanogaster]
FBgn0041243	2.32193	0.104399	1	Gr43a	gustatory receptor 43a, isoform C [Drosophila melanogaster]
FBgn0003175	-0.181826	0.104611	0.56662	px	plexus, isoform A [Drosophila melanogaster]
FBgn0030895	0.715082	0.104786	0.567272	CG7135	uncharacterized protein Dmel_CG7135 [Drosophila melanogaster]
FBgn0031094	-0.167723	0.104959	0.567908	CG9578	uncharacterized protein Dmel_CG9578 [Drosophila melanogaster]
FBgn0036695	-0.192645	0.105144	0.568614	Papst2	PAPS transporter 2 [Drosophila melanogaster]
FBgn0039965	0.169803	0.105249	0.568884	Coa7	cytochrome c oxidase assembly factor 7, isoform A [Drosophila melanogaster]
FBgn0083960	2.58496	0.105295	1	CG34124	uncharacterized protein Dmel_CG34124 [Drosophila melanogaster]
FBgn0040697	1.11064	0.105391	0.569079	Teh3	tipE homolog 3 [Drosophila melanogaster]
FBgn0030670	0.159519	0.105395	0.569079	Pis	phosphatidylinositol synthase, isoform A [Drosophila melanogaster]
FBgn0027079	0.212551	0.10565	0.569802	ValRS	Valyl-tRNA synthetase, isoform C [Drosophila melanogaster]
FBgn0033998	-0.127074	0.105711	0.569802	row	relative of woc, isoform A [Drosophila melanogaster]
FBgn0036504	0.605968	0.10574	0.569802	yellow-k	yellow-k [Drosophila melanogaster]
FBgn0264291	0.272091	0.10575	0.569802	Det	deterin [Drosophila melanogaster]
FBgn0028509	0.190621	0.105872	0.569802	CenG1A	centaurin gamma 1A, isoform B [Drosophila melanogaster]
FBgn0003256	0.171181	0.105884	0.569802	rl	rolled, isoform C [Drosophila melanogaster]
FBgn0028563	-0.130163	0.105915	0.569802	sut1	sugar transporter 1 [Drosophila melanogaster]
FBgn0028644	0.528694	0.106034	0.570145	beat-Ic	beaten path Ic, isoform B [Drosophila melanogaster]
FBgn0052568	6.64386	0.106088	1	CG32568	uncharacterized protein Dmel_CG32568, isoform C [Drosophila melanogaster]
FBgn0052225	0.48635	0.106145	0.570445	CG32225	uncharacterized protein Dmel_CG32225 [Drosophila melanogaster]
FBgn0038466	-0.13691	0.106726	0.57327	CG8907	uncharacterized protein Dmel_CG8907, isoform B [Drosophila melanogaster]
FBgn0015024	0.132415	0.106884	0.573655	CkIalpha	casein kinase ialpha, isoform D [Drosophila melanogaster]
FBgn0040958	0.473556	0.106985	0.573655	Peritrophin-15b	Peritrophin-15b, isoform C [Drosophila melanogaster]
FBgn0035251	-0.132968	0.107117	0.573655	Vta1	vesicle trafficking 1 [Drosophila melanogaster]
FBgn0033019	0.223411	0.107118	0.573655	CG10395	uncharacterized protein Dmel_CG10395, isoform E [Drosophila melanogaster]
FBgn0042179	-0.237583	0.107143	0.573655	Ugt305A1	UDP-glycosyltransferase family 305 member A1, isoform B [Drosophila melanogaster]
FBgn0003380	0.46984	0.107268	0.573655	Sh	potassium voltage-gated channel protein Shaker isoform X2 [Drosophila mauritiana]
FBgn0033774	-0.168156	0.10727	0.573655	CG12374	uncharacterized protein Dmel_CG12374 [Drosophila melanogaster]
FBgn0050000	0.191884	0.107283	0.573655	GstT1	glutathione S transferase T1 [Drosophila melanogaster]
FBgn0032329	0.249349	0.107297	0.573655	Art8	--
MSTRG.4309	-1.48403	0.107312	1	--	--
FBgn0031057	-0.104016	0.107616	0.574884	Ubqn	ubiquilin, isoform B [Drosophila melanogaster]
FBgn0004395	0.116619	0.107639	0.574884	unk	unkempt, isoform G [Drosophila melanogaster]
FBgn0040813	-0.125357	0.107693	0.574884	Nplp2	Neuropeptide-like precursor 2, isoform C [Drosophila melanogaster]
FBgn0250904	6.49185	0.10777	1	CG34434	uncharacterized protein Dmel_CG34434 [Drosophila melanogaster]
FBgn0038300	-0.171774	0.107784	0.575072	Mau2	Mau2 sister chromatid cohesion factor [Drosophila melanogaster]
FBgn0039463	6.54432	0.107823	1	Spag1	Spag1 axonemal dynein assembly factor [Drosophila melanogaster]
FBgn0029603	-0.579629	0.107859	0.575095	CG14053	FI19337p1, partial [Drosophila melanogaster]
FBgn0033830	0.703383	0.1079	0.575095	CG10814	uncharacterized protein Dmel_CG10814 [Drosophila melanogaster]
FBgn0001229	0.247907	0.108052	0.575611	Hsp67Bc	heat shock gene 67Bc [Drosophila melanogaster]
FBgn0038380	-0.965784	0.108276	0.576508	CG14877	uncharacterized protein Dmel_CG14877 [Drosophila melanogaster]
FBgn0028988	-0.178669	0.108362	0.576665	Spn42Dd	serpin 42Dd [Drosophila melanogaster]
FBgn0024244	0.273939	0.108453	0.576854	drm	drumstick, isoform C [Drosophila melanogaster]
FBgn0032075	0.142964	0.108524	0.576936	Tsp29Fb	--
FBgn0011020	-0.182426	0.108724	0.577203	Sas-4	spindle assembly abnormal 4 [Drosophila melanogaster]
FBgn0027654	0.26179	0.108736	0.577203	jdp	jdp, isoform A [Drosophila melanogaster]
FBgn0000053	-0.0976188	0.108742	0.577203	Gart	GART trifunctional enzyme, isoform C [Drosophila melanogaster]
FBgn0026268	-0.637632	0.108888	0.577679	antdh	antdh [Drosophila melanogaster]
FBgn0265089	2.50901	0.109005	1	eIF4E3	eukaryotic translation initiation factor 4E3 [Drosophila melanogaster]
FBgn0260991	-0.149039	0.109069	0.578346	Incenp	inner centromere protein, isoform B [Drosophila melanogaster]
FBgn0033403	0.570749	0.109133	0.578387	CG13739	uncharacterized protein Dmel_CG13739 [Drosophila melanogaster]
FBgn0036493	-0.160636	0.109192	0.57839	CG7255	uncharacterized protein Dmel_CG7255, isoform F [Drosophila melanogaster]
FBgn0037746	-0.132636	0.109245	0.57839	CG8478	uncharacterized protein Dmel_CG8478, isoform D [Drosophila melanogaster]
FBgn0283666	0.216091	0.10943	0.579071	Rap2l	Ras-associated protein 2-like, isoform A [Drosophila melanogaster]
FBgn0004049	-0.176891	0.10953	0.579272	yrt	yurt, isoform A [Drosophila melanogaster]
FBgn0024804	0.183501	0.109654	0.579272	Dbp80	dead box protein 80, isoform E [Drosophila melanogaster]
FBgn0032940	0.162412	0.109678	0.579272	Mondo	mondo, isoform F [Drosophila melanogaster]
FBgn0027525	-0.0956457	0.109793	0.579272	LTV1	LTV1 ribosome biogenesis factor, isoform B [Drosophila melanogaster]
FBgn0014073	-0.252026	0.109794	0.579272	Tie	Tie-like receptor tyrosine kinase [Drosophila melanogaster]
FBgn0011836	-0.191568	0.10986	0.579272	Taf2	TBP-associated factor 2, isoform B [Drosophila melanogaster]
FBgn0286511	-0.14813	0.109927	0.579272	Pld	phospholipase D, isoform F [Drosophila melanogaster]
FBgn0013680	0.953057	0.109993	0.579272	mt:ND2	--
FBgn0028539	-0.185231	0.110011	0.579272	Eato	engulfment ABC transporter in the ovary, isoform B [Drosophila melanogaster]
FBgn0039261	-0.109177	0.110028	0.579272	Ythdf	YTH N6-methyladenosine RNA binding protein, isoform D [Drosophila melanogaster]
FBgn0259712	2.58496	0.110124	1	CG42366	uncharacterized protein Dmel_CG42366, isoform A [Drosophila melanogaster]
FBgn0029506	-0.0998938	0.110207	0.579917	Tsp42Ee	tetraspanin 42Ee, isoform B [Drosophila melanogaster]
FBgn0035379	-0.678072	0.110418	0.580734	spz5	spatzle 5 [Drosophila melanogaster]
FBgn0036857	0.20549	0.110519	0.580773	Aldh7A1	aldehyde dehydrogenase 7 family member A1 [Drosophila melanogaster]
[truncated: 12,060 more rows]

## Sheet: DEGs
id	log2(fc)	PValue	FDR	Symbol	Description
FBgn0014859	3.55963	3.96e-84	4.09e-80	Hr38	hormone receptor-like in 38, isoform B [Drosophila melanogaster]
FBgn0036381	1.04748	3.87e-36	1.33e-32	CG8745	uncharacterized protein Dmel_CG8745 [Drosophila melanogaster]
FBgn0042186	1.85357	1.45e-34	3.74e-31	CG17239	uncharacterized protein Dmel_CG17239, isoform B [Drosophila melanogaster]
FBgn0036992	-1.50495	2.58e-34	5.34e-31	Hpd	4-hydroxyphenylpyruvate dioxygenase, isoform A [Drosophila melanogaster]
FBgn0051324	1.66428	2.88e-33	4.96e-30	CG31324	uncharacterized protein Dmel_CG31324, isoform B [Drosophila melanogaster]
FBgn0033760	1.15395	1.04e-29	1.54e-26	CG8785	uncharacterized protein Dmel_CG8785, isoform A [Drosophila melanogaster]
FBgn0032055	-1.10838	6.01e-29	7.77e-26	Sgp	--
FBgn0003980	1.38977	4.42e-27	5.08e-24	Vm26Ab	vitelline membrane 26Ab, isoform B [Drosophila melanogaster]
FBgn0031406	1.75284	1.86e-24	1.75e-21	Send1	spermathecal endopeptidase 1 [Drosophila melanogaster]
FBgn0040069	1.25063	1.84e-23	1.46e-20	vanin-like	vanin-like [Drosophila melanogaster]
FBgn0036833	-1.12198	8.61e-23	5.94e-20	CG3819	uncharacterized protein Dmel_CG3819, isoform B [Drosophila melanogaster]
FBgn0040609	1.15788	9.88e-20	5.38e-17	CG3348	uncharacterized protein Dmel_CG3348, isoform B [Drosophila melanogaster]
FBgn0284233	-1.47699	1.32e-19	6.8e-17	CG46317	***** No hits found *****
FBgn0042187	3.53924	9.41e-19	4.63e-16	CG17234	MIP16537p, partial [Drosophila melanogaster]
FBgn0266430	-1.42283	9.01e-18	4.05e-15	CG45060	GD24557 [Drosophila simulans]
MSTRG.7684	1.4386	1.15e-15	4.58e-13	--	--
FBgn0039091	1.00891	1.93e-15	6.42e-13	CG10182	uncharacterized protein Dmel_CG10182 [Drosophila melanogaster]
FBgn0033981	-1.11363	6.29e-15	1.97e-12	Cyp6a21	Cyp6a21 [Drosophila melanogaster]
FBgn0038542	-1.10841	1.27e-14	3.66e-12	TyrR	tyramine receptor, isoform B [Drosophila melanogaster]
FBgn0259140	-1.28339	1.99e-14	5.55e-12	CG42255	uncharacterized protein Dmel_CG42255 [Drosophila melanogaster]
FBgn0034480	-1.14215	3.54e-14	9.64e-12	CG16898	uncharacterized protein Dmel_CG16898 [Drosophila melanogaster]
FBgn0051259	1.01693	4.36e-14	1.12e-11	CG31259	uncharacterized protein Dmel_CG31259, isoform B [Drosophila melanogaster]
FBgn0086265	1.83909	8.93e-14	2.01e-11	psd	palisade, isoform B [Drosophila melanogaster]
FBgn0036935	1.28347	1.41e-13	3.05e-11	CG14186	uncharacterized protein Dmel_CG14186 [Drosophila melanogaster]
FBgn0050360	-1.15503	2.31e-13	4.6e-11	Mal-A6	maltase A6, isoform D [Drosophila melanogaster]
FBgn0030596	1.84121	5.99e-13	1.13e-10	CG12398	FI24332p1, partial [Drosophila melanogaster]
FBgn0030558	-1.18427	6.56e-13	1.19e-10	CG1461	uncharacterized protein Dmel_CG1461, isoform B [Drosophila melanogaster]
FBgn0283437	-1.47312	1.26e-12	2.24e-10	PPO1	prophenoloxidase 1 [Drosophila melanogaster]
FBgn0265182	1.02774	4.42e-12	7.38e-10	CG44247	uncharacterized protein Dmel_CG44247, isoform B [Drosophila melanogaster]
FBgn0040211	-1.32321	1.63e-11	2.56e-09	hgo	homogentisate 1,2-dioxygenase [Drosophila melanogaster]
FBgn0286723	-1.80669	7.51e-11	1.04e-08	hll	heimdall [Drosophila melanogaster]
FBgn0040993	1.15808	9.53e-11	1.26e-08	CG17325	uncharacterized protein Dmel_CG17325, isoform B [Drosophila melanogaster]
FBgn0259201	1.15808	9.53e-11	1.26e-08	CG42305	uncharacterized protein Dmel_CG42305, isoform A [Drosophila melanogaster]
FBgn0264253	2.38429	1.11e-10	1.41e-08	Send2	MIP16540p, partial [Drosophila melanogaster]
FBgn0034741	1.12234	2.09e-09	2.2e-07	CG4269	uncharacterized protein Dmel_CG4269, isoform C [Drosophila melanogaster]
FBgn0025833	1.65322	6.66e-09	6.32e-07	CG8910	uncharacterized protein Dmel_CG8910 [Drosophila melanogaster]
FBgn0029966	2.46304	1.67e-08	1.5e-06	Ir7c	ionotropic receptor 7c, isoform B [Drosophila melanogaster]
FBgn0033367	-1.21315	1.9e-08	1.69e-06	PPO2	prophenoloxidase 2 [Drosophila melanogaster]
FBgn0031000	-1.07461	3.82e-08	3.18e-06	Muc18B	mucin 18B, isoform B [Drosophila melanogaster]
FBgn0002563	1.26447	1.63e-07	1.19e-05	Lsp1beta	larval serum protein 1 beta, isoform B [Drosophila melanogaster]
FBgn0033887	1.64224	1.64e-07	1.19e-05	St4	sulfotransferase 4, isoform B [Drosophila melanogaster]
FBgn0054040	-1.72386	2.6e-07	1.8e-05	CG34040	uncharacterized protein Dmel_CG34040 [Drosophila melanogaster]
FBgn0267964	7.22882	3.14e-07	2.13e-05	CG46244	uncharacterized protein Dmel_CG46244 [Drosophila melanogaster]
FBgn0034715	1.40234	6.83e-07	4.47e-05	Oatp58Db	organic anion transporting polypeptide 58Db [Drosophila melanogaster]
FBgn0038641	1.06895	2.87e-06	0.000168378	ChT	uncharacterized protein Dmel_CG7708, isoform A [Drosophila melanogaster]
FBgn0003979	1.83675	4.36e-06	0.000239509	Vm26Aa	vitelline membrane 26Aa, isoform B [Drosophila melanogaster]
FBgn0086677	1.16601	9.31e-06	0.000467387	jeb	jelly belly, isoform B [Drosophila melanogaster]
FBgn0037697	-1.08632	9.73e-06	0.000483595	GstZ2	GH17960p, partial [Drosophila melanogaster]
FBgn0037107	1.12959	2.23e-05	0.000978542	CG7166	uncharacterized protein Dmel_CG7166, isoform C [Drosophila melanogaster]
FBgn0033216	-1.04302	2.63e-05	0.00113702	CG1946	uncharacterized protein Dmel_CG1946 [Drosophila melanogaster]
FBgn0032283	1.06757	4.84e-05	0.00197611	CG7296	--
FBgn0085362	2.01134	5.39e-05	0.00217512	Vml	vitelline membrane-like, isoform A [Drosophila melanogaster]
FBgn0086266	2.93842	5.6e-05	0.00223729	Vm26Ac	vitelline membrane 26Aac [Drosophila melanogaster]
FBgn0028875	1.18521	0.000104913	0.00386049	nAChRalpha5	nicotinic acetylcholine receptor alpha5, isoform H [Drosophila melanogaster]
FBgn0036359	-1.06914	0.00018022	0.00629553	CG14105	uncharacterized protein Dmel_CG14105 [Drosophila melanogaster]
FBgn0284227	-1.15677	0.00025684	0.00851193	CG46311	uncharacterized protein Dmel_CG46311 [Drosophila melanogaster]
FBgn0051091	-1.14349	0.000341356	0.0107931	CG31091	uncharacterized protein Dmel_CG31091, isoform B [Drosophila melanogaster]
FBgn0263996	-1.04307	0.000350549	0.0109507	CG43739	***** No hits found *****
FBgn0051661	1.24994	0.000395413	0.0119899	CG31661	uncharacterized protein Dmel_CG31661 [Drosophila melanogaster]
FBgn0031697	1.25831	0.000458608	0.0135486	CG14024	uncharacterized protein Dmel_CG14024, isoform B [Drosophila melanogaster]
FBgn0019928	1.03554	0.00057038	0.0158531	Ser8	IP02555p, partial [Drosophila melanogaster]
FBgn0032835	1.33731	0.00064392	0.0175214	CG16772	uncharacterized protein Dmel_CG16772, isoform B [Drosophila melanogaster]
FBgn0051296	-1.20848	0.000645814	0.0175268	CG31296	uncharacterized protein Dmel_CG31296, isoform B [Drosophila melanogaster]
FBgn0026755	-1.24315	0.000752176	0.0197979	Ugt37B1	UDP-glycosyltransferase family 37 member B1 [Drosophila melanogaster]
FBgn0284435	1.20318	0.000896691	0.0227292	tyn	trynity, isoform A [Drosophila melanogaster]
FBgn0284223	1.18688	0.0010734	0.0261767	CG46307	uncharacterized protein Dmel_CG46307 [Drosophila melanogaster]
FBgn0003046	1.22456	0.00133851	0.0311717	Pcp	LP18565p [Drosophila melanogaster]
FBgn0037519	1.18796	0.00137889	0.0318253	CG3014	uncharacterized protein Dmel_CG3014, isoform C [Drosophila melanogaster]
FBgn0033296	-1.03246	0.00144066	0.0328801	Mal-A7	maltase A7, isoform B [Drosophila melanogaster]
FBgn0035929	1.10642	0.00156652	0.034834	CG13311	uncharacterized protein Dmel_CG13311 [Drosophila melanogaster]
FBgn0053983	-1.29862	0.00161799	0.0355203	obst-H	obstructor-H [Drosophila melanogaster]
FBgn0250908	1.08539	0.0017929	0.0384618	beat-VII	beaten path VII [Drosophila melanogaster]
FBgn0002565	4.3505	0.00238995	0.0478916	Lsp2	larval serum protein 2, isoform B [Drosophila melanogaster]

## Sheet: Axenic flies lifetable
	Antibiotic reared flies-lifespan assay
		CK	EGT
	Total flies	134	136
	Days	Ck	Days	EGT
	3	2	2	1
	6	1	5	1
	9	2	8	1
	15	1	11	2
	24	2	17	2
	30	1	23	2
	33	2	26	2
	36	4	35	1
	42	3	38	2
	45	2	41	1
	48	8	44	3
	51	2	47	6
	54	5	50	6
	57	16	53	8
	60	12	56	4
	63	13	59	12
	66	16	62	11
	69	15	65	17
	72	10	68	9
	75	11	71	9
	78	4	74	5
	81	1	77	10
			80	14
			83	7

## Sheet: Canton S life table
Canton S lifespan assay
Female	CK	EGT-10mM	EGT-1mM	EGT-100uM	EGT-10uM	EGT-1uM	EGT-100nM
Total flies	129	138	114	124	138	133	116
Days	Ck		Days	EGT-10mM
3	2		7	1		Days	EGT-1mM		Days	EGT-100uM		Days	EGT-10uM		Days	EGT-1uM		Days	EGT-100nM
19	1		9	1		3	2		20	2		24	1		39	2		6	1
26	2		13	2		6	1		29	1		27	1		43	3		29	1
47	1		18	2		13	2		35	1		33	2		48	2		54	1
55	2		25	1		16	1		38	1		36	4		58	2		66	1
58	2		29	1		18	1		54	4		39	3		61	5		69	1
60	2		31	1		20	1		60	2		43	1		64	1		72	3
66	4		35	3		37	2		63	1		49	1		67	1		75	2
70	11		38	2		41	2		66	2		52	3		70	5		78	12
73	7		41	3		44	3		72	1		58	3		73	5		81	10
76	9		44	5		46	1		75	1		61	1		76	5		84	25
79	14		46	2		49	1		78	1		64	2		79	10		87	22
82	7		49	1		57	2		84	7		70	2		82	19		90	13
85	17		52	1		59	3		87	7		73	2		85	23		93	11
88	13		56	2		63	2		90	6		76	2		88	12		96	9
91	11		62	4		65	1		93	9		79	2		91	11		99	2
94	12		65	1		69	3		96	16		82	8		94	13		102	2
96	5		68	3		72	3		99	25		85	6		97	7
99	6		71	4		75	3		102	19		88	9		99	6
102	1		77	1		78	1		105	10		91	12		103	1
			80	7		80	2		108	8		94	6
			82	4		84	4					97	34
			86	19		87	5					100	5
			88	12		89	2					103	19
			92	4		90	5					106	8
			95	10		93	4					109	1
			98	18		96	11
			101	9		99	13
			104	4		102	17
			107	6		105	15
			109	3		107	1
			113	1
Male	CK	EGT-10mM	EGT-1mM	EGT-100uM	EGT-10uM	EGT-1uM	EGT-100nM
Total flies	147	142	147	152	143	146	140
Days	Ck		Days	EGT-10mM		Days	EGT-1mM		Days	EGT-100uM		Days	EGT-10uM		Days	EGT-1uM		Days	EGT-100nM
9	1		3	1		5	1		12	1		3	2		4	2		3	1
12	1		6	5		8	3		17	1		6	1		8	3		6	1
15	1		9	2		14	3		24	2		12	1		14	1		12	4
18	1		12	1		17	1		42	4		15	3		17	1		18	3
21	2		15	1		20	3		47	5		18	1		20	2		21	4
24	1		18	3		23	1		50	6		21	3		23	1		24	1
27	1		21	1		26	6		54	3		24	1		26	5		27	3
30	2		24	1		29	3		57	3		27	2		29	4		30	1
33	4		27	4		32	2		60	8		30	2		32	7		33	2
36	4		30	4		35	2		63	5		33	5		35	3		36	2
39	2		33	1		38	2		66	2		36	3		38	4		39	7
42	7		36	6		41	3		69	7		39	3		41	1		42	3
45	3		39	7		44	3		72	17		42	4		44	3		45	4
51	5		42	4		47	3		75	18		45	4		47	5		48	1
54	7		45	2		50	3		78	33		48	3		50	2		51	1
57	1		48	3		53	1		81	19		51	3		53	1		54	5
60	1		51	5		59	2		84	17		54	2		56	4		57	7
63	7		57	4		62	5		87	1		57	1		59	1		60	3
66	9		60	3		65	4					60	5		62	16		63	7
69	12		63	14		68	4					63	12		65	20		66	20
72	5		66	10		71	10					66	1		68	17		69	6
75	34		69	6		74	8					69	7		71	3		72	3
78	17		72	8		77	19					72	10		74	13		75	20
81	13		75	12		80	12					75	29		77	12		78	23
84	1		78	1		83	41					78	19		80	13		81	6
			81	2		86	2					81	9		83	2		87	2
			84	7								87	7
			87	4
			90	7
			93	5
			96	13

## Sheet: YW life table
YW lifespan assay
Female	CK	EGT-10mM	EGT-1mM	EGT-100uM	EGT-10uM	EGT-1uM	EGT-100nM
Total flies	142	129	140	123	136	146	133
Days	Ck		Days	EGT-10mM		Days	EGT-1mM		Days	EGT-100uM		Days	EGT-10uM		Days	EGT-1uM		DAYs	EGT-100nM
4	2		5	1		2	1		3	1		9	1		8	2		2	5
6	1		12	1		17	1		9	3		13	1		23	1		8	2
9	1		15	1		23	1		12	1		19	2		26	1		11	1
39	1		21	1		35	1		15	1		22	2		29	1		17	1
42	1		30	1		41	1		18	1		25	1		35	1		26	1
45	2		33	1		51	1		24	1		28	6		38	1		29	1
48	2		42	3		60	2		33	1		31	2		41	2		32	1
51	2		45	1		63	1		39	2		34	3		44	2		35	1
52	2		48	1		66	6		46	2		37	3		47	5		41	1
54	1		51	3		69	12		55	1		40	5		50	2		47	2
58	10		54	3		72	8		58	2		43	4		53	8		50	2
61	4		57	10		75	14		61	1		46	1		56	7		53	8
64	8		60	8		78	15		64	4		49	2		59	4		56	1
67	9		63	11		81	21		67	1		52	5		62	8		59	5
70	23		66	17		84	16		70	3		55	3		65	7		62	8
73	10		69	19		87	8		73	2		61	12		68	8		65	20
76	20		72	13		90	16		76	8		64	13		71	11		68	13
79	31		75	11		93	12		79	14		70	10		74	20		71	18
81	3		78	10		96	3		82	12		73	29		77	15		74	18
84	4		81	10					85	11		76	9		80	30		77	2
88	4		84	1					88	28		79	3		83	2		80	15
90	1		87	1					91	12		82	5		86	5		83	4
			90	1					94	6		85	6		89	1		86	1
									97	4		88	4		92	2		89	2
									106	1		91	4
YW Male lifespan assay
Male	CK	EGT-10mM	EGT-1mM	EGT-100uM	EGT-10uM	EGT-1uM	EGT-100nM
Total flies	113	137	140	145	120	143	137
Days	Ck		Days	EGT-10mM		Days	EGT-1mM		Days	EGT-100uM		Days	EGT-10uM		Days	EGT-1uM		Days	EGT-100nM
2	1		3	2		3	2		12	1		4	1		2	1		2	2
5	1		6	3		9	1		21	1		44	2		12	1		6	1
18	1		15	2		18	1		24	1		47	1		15	1		8	1
24	1		18	1		21	1		27	1		50	3		18	4		11	2
27	1		21	1		24	1		30	1		53	2		20	1		14	3
30	3		24	1		27	2		42	4		56	5		24	2		17	1
34	1		27	1		30	2		48	3		58	3		27	3		23	3
37	3		30	3		36	2		51	2		59	5		30	2		27	7
42	1		33	1		39	2		54	2		62	5		33	2		29	5
45	3		36	1		42	4		57	3		68	7		36	3		36	2
48	8		39	2		45	2		60	3		71	15		39	12		39	20
52	3		45	3		48	2		63	7		74	15		42	6		42	2
55	3		48	2		51	4		66	5		77	10		45	2		48	3
58	6		51	6		54	3		69	16		80	17		48	3		51	6
60	4		54	7		57	4		72	12		83	10		51	3		53	1
63	4		57	6		60	5		75	11		86	8		54	9		57	7
66	9		60	5		63	7		78	10		88	1		57	12		60	5
70	17		63	6		66	10		81	22		89	1		60	5		63	9
73	19		66	8		69	7		84	13		92	5		63	11		66	6
76	9		69	16		72	42		87	7		95	3		66	5		69	5
78	8		72	11		75	31		90	5		98	1		69	5		72	8
81	7		75	10		78	5		93	2					72	14		75	8
			78	16					96	3					75	10		78	16
			81	14					102	4					78	7		81	7
			87	7					105	2					81	11		84	5
			90	2					108	4					84	5		87	1
															93	2		89	1
															96	1

## Sheet: Dietary restriction
	Total flies
	YW Female	1% Yeast	5% Yeast	10% Yeast	15% Yeast	20% Yeast
	CK	139	139	141	141	138
	EGT	148	143	136	149	136
	Days	CK-1% Yeast	Days	EGT-1% Yeast		Days	CK-5% Yeast	Days	EGT-5% Yeast		Days	CK-10% Yeast	Days	EGT-10% Yeast		Days	EGT-15% Yeast	Days	EGT-15% Yeast		Days	CK-20% Yeast	Days	EGT-20% Yeast
	4	2	30	1		3	3	3	4		6	1	4	1		3	2	2	1		3	1	6	5
	8	2	36	2		6	2	16	1		9	1	18	1		12	1	17	1		9	3	21	3
	14	1	42	4		9	2	22	1		26	1	34	2		18	1	23	5		18	1	36	2
	26	1	48	3		12	1	28	1		35	1	43	1		24	1	26	1		24	1	39	3
	29	1	51	1		15	4	31	1		40	1	53	1		27	2	29	3		30	2	42	4
	35	1	54	2		33	1	34	1		44	2	55	1		30	1	32	3		33	2	48	1
	38	3	57	7		36	1	37	1		47	2	65	2		39	2	41	2		36	1	51	5
	46	1	60	3		39	3	40	1		53	3	67	3		42	3	44	1		42	4	54	5
	50	2	63	13		48	2	43	2		56	3	70	5		45	3	47	1		45	2	57	4
	53	10	66	23		54	2	52	3		58	1	74	7		51	7	50	5		48	5	60	2
	56	11	69	13		60	5	55	1		61	1	77	10		54	4	53	1		51	3	63	4
	59	7	72	9		63	6	61	1		65	1	80	14		57	3	56	2		54	4	66	5
	62	7	75	17		66	6	64	8		68	11	83	18		60	7	60	1		57	9	69	10
	65	11	78	17		69	23	67	7		71	8	86	24		63	8	63	5		60	10	72	8
	68	14	81	27		72	10	70	4		74	7	88	30		66	7	65	2		63	16	75	16
	71	14	84	2		75	5	73	18		77	21	92	7		69	5	69	2		66	16	78	26
	74	12	90	4		78	15	76	15		80	14	94	2		72	15	72	10		69	20	81	10
	77	14				81	26	79	19		83	14	97	2		75	25	75	15		72	15	84	4
	80	23				84	5	82	14		86	15	100	2		78	10	78	15		78	6	87	7
	83	2				87	9	85	14		89	5	103	3		81	16	81	40		81	10	90	9
						90	7	88	14		92	7				87	10	84	28		84	5	94	3
						93	1	91	10		95	10				90	7	88	2		87	2
								94	1		97	5				93	1	92	2
								97	1		100	6						96	1

## Sheet: Fecundity
			Ck	EGT
		Days	eggs/fly/day	eggs/fly/day
		2	95	89
		4	91	83
		6	74	93
		10	85	74
		12	81	92
		14	80	81
		16	64	57
		18	45	66
		20	38	50
		22	38	44
		24	58	87
		26	40	68
		28	45	63
		30	44	65
		32	84	74
		34	58	63
		36	71	57
		38	74	57
		40	56	46
		42	33	32
		44	53	28
		46	39	31
		48	22	47
		50	16	31
		52	13	42
		54	24	52
		56	15	27
		58	5	3
		60	34	4
		62	18	1
		64	14	11
		66	5	6
		68	0	3
		72	3	3
		74	5	4
		76	0	1
